# Supplementary material for: Development of a novel highly anti-proliferative family of gold complexes: Au(i)-phosphonium-phosphines
Source: Royal Society of Chemistry journal article supplement (doi:10.1039/d0dt03708g), 2021-01-01

## Supporting Information

### Development of a novel highly anti-proliferative family of gold complexes: Au(I)-phosphonium-phosphines

Benjamin Rousselle,<sup>a</sup> Florence Bouyer,<sup>b</sup> Jérôme Bayardon,<sup>a</sup> Myriam Laly,<sup>a</sup> François Ghiringhelli,<sup>b</sup>  
Yoann Rousselin,<sup>a</sup> Ewen Bodio,<sup>\*a</sup> and Raluca Malacea-Kabbara<sup>\*a</sup>

<sup>a</sup> ICMUB UMR6302, CNRS, Univ. Bourgogne Franche-Comté, F-21000 Dijon, France

<sup>b</sup> INSERM UMR 1231, Dijon, France

ewen.bodio@u-bourgogne.fr, raluca.malacea@u-bourgogne.fr

#### Table of content

|                                                                                                                             |       |
|-----------------------------------------------------------------------------------------------------------------------------|-------|
| 1. <sup>1</sup> H, <sup>13</sup> C{ <sup>1</sup> H} and <sup>31</sup> P{ <sup>1</sup> H} NMR spectra of compound <b>2</b>   | p. 2  |
| 2. <sup>1</sup> H, <sup>13</sup> C{ <sup>1</sup> H} and <sup>31</sup> P{ <sup>1</sup> H} NMR spectra of compound <b>3</b>   | p. 4  |
| 3. <sup>1</sup> H, <sup>13</sup> C{ <sup>1</sup> H} and <sup>31</sup> P{ <sup>1</sup> H} NMR spectra of compound <b>4</b>   | p. 6  |
| 4. <sup>1</sup> H, <sup>13</sup> C{ <sup>1</sup> H} and <sup>31</sup> P{ <sup>1</sup> H} NMR spectra of compound <b>5a</b>  | p. 8  |
| 5. <sup>1</sup> H, <sup>13</sup> C{ <sup>1</sup> H} and <sup>31</sup> P{ <sup>1</sup> H} NMR spectra of compound <b>5b</b>  | p. 10 |
| 6. <sup>1</sup> H, <sup>13</sup> C{ <sup>1</sup> H} and <sup>31</sup> P{ <sup>1</sup> H} NMR spectra of compound <b>5c</b>  | p. 12 |
| 7. <sup>1</sup> H, <sup>13</sup> C{ <sup>1</sup> H} and <sup>31</sup> P{ <sup>1</sup> H} NMR spectra of compound <b>5d</b>  | p. 14 |
| 8. <sup>1</sup> H, <sup>13</sup> C{ <sup>1</sup> H} and <sup>31</sup> P{ <sup>1</sup> H} NMR spectra of compound <b>5e</b>  | p. 16 |
| 9. <sup>1</sup> H, <sup>13</sup> C{ <sup>1</sup> H} and <sup>31</sup> P{ <sup>1</sup> H} NMR spectra of compound <b>5f</b>  | p. 18 |
| 10. <sup>1</sup> H, <sup>13</sup> C{ <sup>1</sup> H} and <sup>31</sup> P{ <sup>1</sup> H} NMR spectra of compound <b>1a</b> | p. 20 |
| 11. <sup>1</sup> H, <sup>13</sup> C{ <sup>1</sup> H} and <sup>31</sup> P{ <sup>1</sup> H} NMR spectra of compound <b>1b</b> | p. 22 |
| 12. <sup>1</sup> H, <sup>13</sup> C{ <sup>1</sup> H} and <sup>31</sup> P{ <sup>1</sup> H} NMR spectra of compound <b>1c</b> | p. 24 |
| 13. <sup>1</sup> H, <sup>13</sup> C{ <sup>1</sup> H} and <sup>31</sup> P{ <sup>1</sup> H} NMR spectra of compound <b>1d</b> | p. 26 |
| 14. <sup>1</sup> H, <sup>13</sup> C{ <sup>1</sup> H} and <sup>31</sup> P{ <sup>1</sup> H} NMR spectra of compound <b>1e</b> | p. 28 |
| 15. <sup>1</sup> H, <sup>13</sup> C{ <sup>1</sup> H} and <sup>31</sup> P{ <sup>1</sup> H} NMR spectra of compound <b>1f</b> | p. 30 |
| 16. <sup>1</sup> H, <sup>13</sup> C{ <sup>1</sup> H} and <sup>31</sup> P{ <sup>1</sup> H} NMR spectra of compound <b>1g</b> | p. 32 |
| 17. Crystal structure and table of crystal data of compound <b>1e</b>                                                       | p. 33 |
| 18. Crystal structure and table of crystal data of compound <b>1f</b>                                                       | p. 43 |
| 19. Stability studies of compounds <b>1a-f</b> in DMSO and in presence of water                                             | p. 50 |
| 20. Water solubility evaluation of compounds <b>1a-g</b> determined by ICP-AES                                              | p. 64 |
| 21. Cells cytotoxicity curves of <b>1a-g</b> , DMSO, oxaliplatin, 5-FU, paclitaxel (A549)                                   | p. 65 |
| 22. Cells cytotoxicity curves of <b>1a-g</b> , DMSO, oxaliplatin, 5-FU, paclitaxel (MDA)                                    | p. 66 |
| 23. Cells cytotoxicity curves of <b>1a-g</b> , DMSO, oxaliplatin, 5-FU, paclitaxel (SW480)                                  | p. 67 |

1.  $^1\text{H}$ ,  $^{13}\text{C}\{^1\text{H}\}$  and  $^{31}\text{P}\{^1\text{H}\}$  NMR spectra of compound **2**

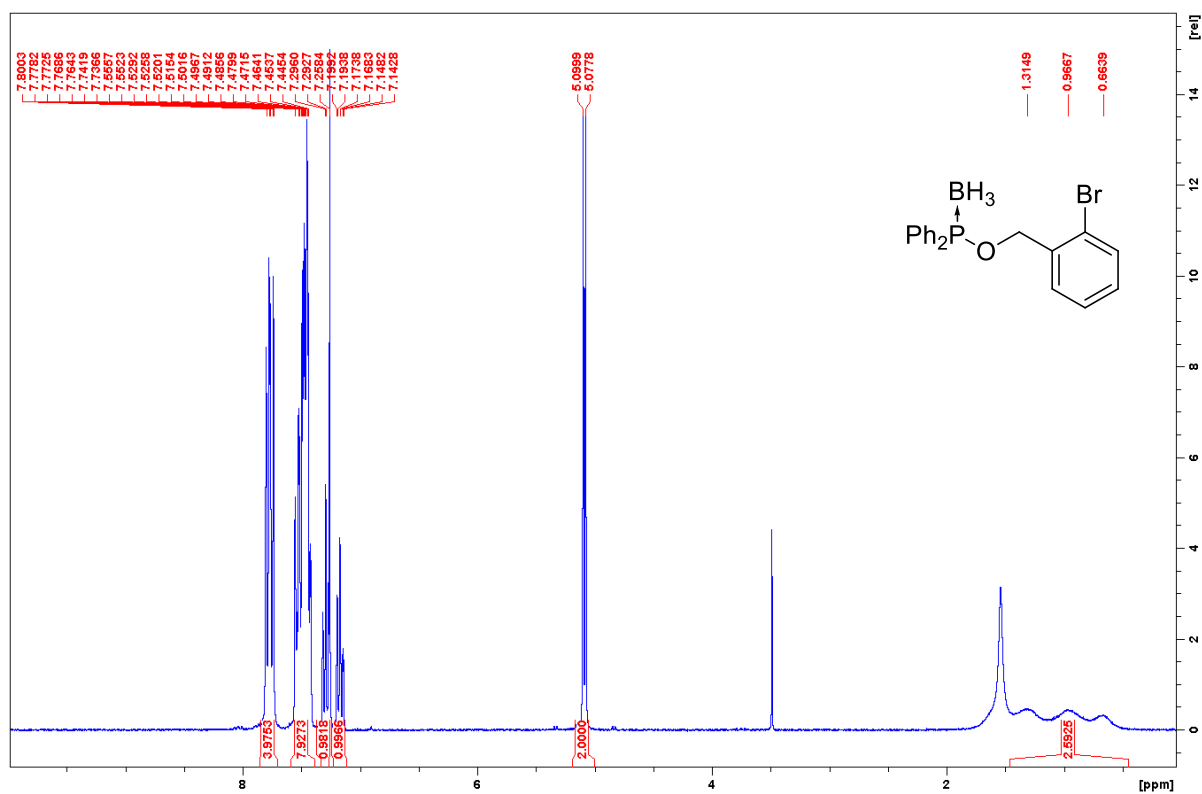

$^1\text{H}$  NMR (300 MHz, Chloroform-*d*)

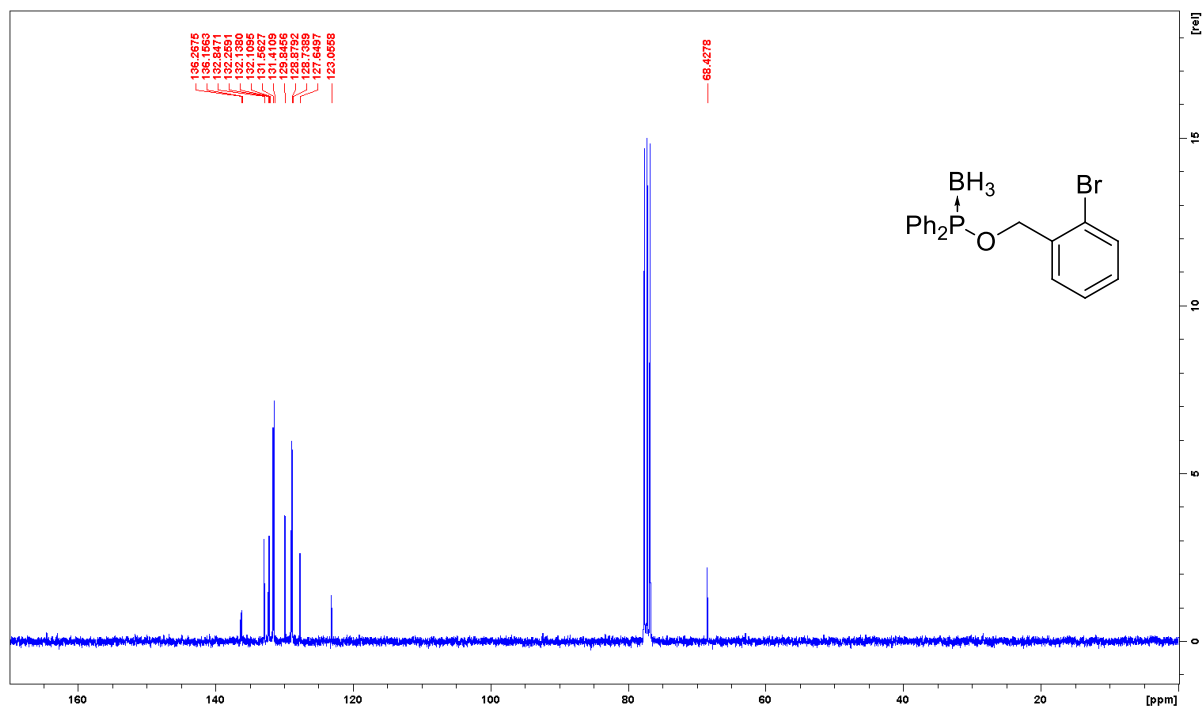

$^{13}\text{C}\{^1\text{H}\}$  NMR (75 MHz, Chloroform-*d*)

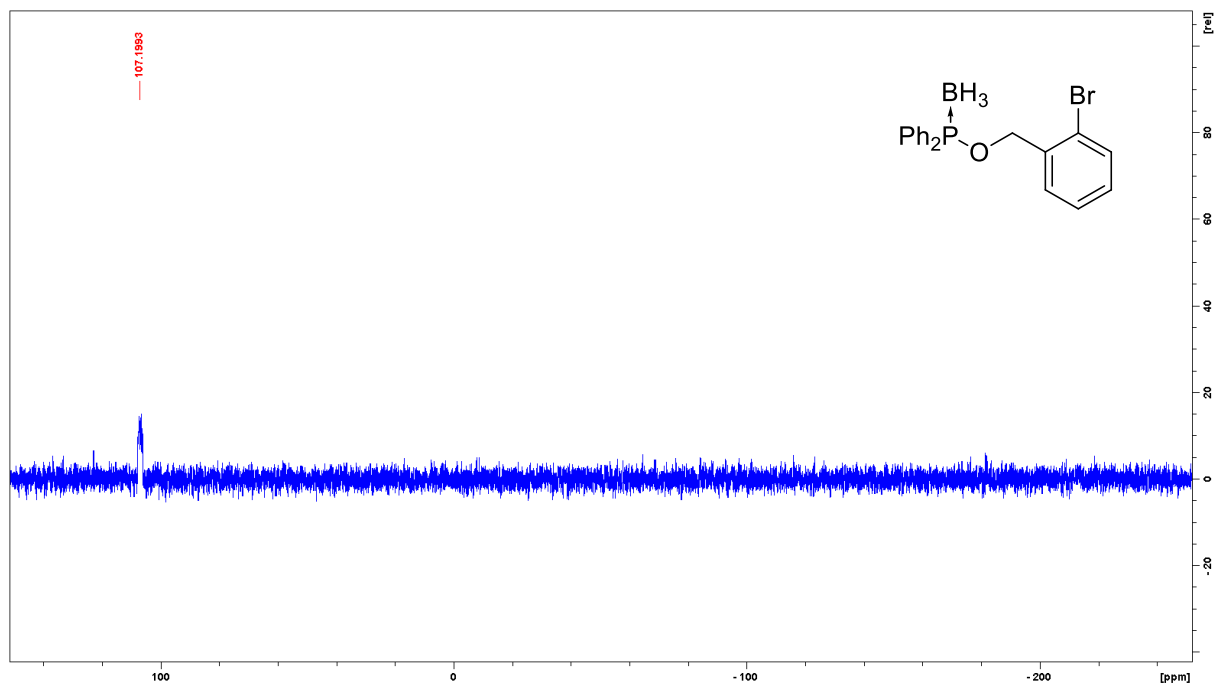

$^{31}\text{P}\{^1\text{H}\}$  NMR (202 MHz, Methylene Chloride- $d_2$ )

2.  $^1\text{H}$ ,  $^{13}\text{C}\{^1\text{H}\}$  and  $^{31}\text{P}\{^1\text{H}\}$  NMR spectra of compound **3**

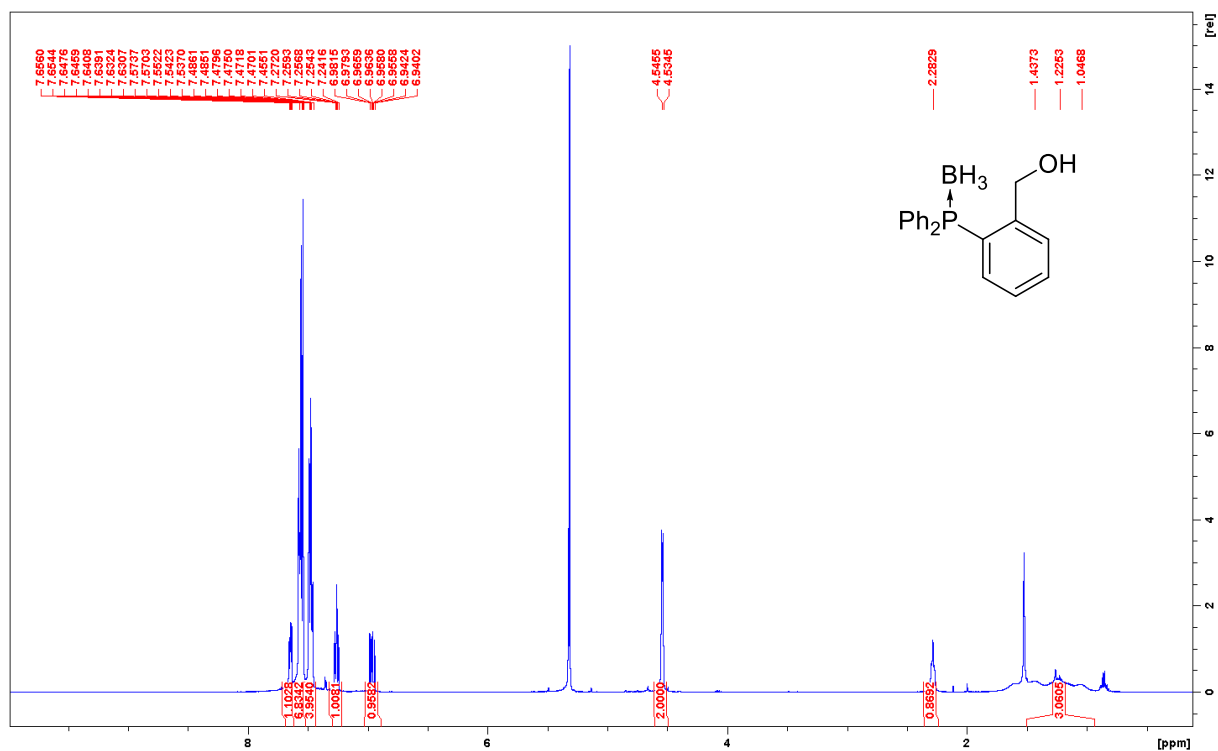

$^1\text{H}$  NMR (500 MHz, Methylene Chloride- $d_2$ )

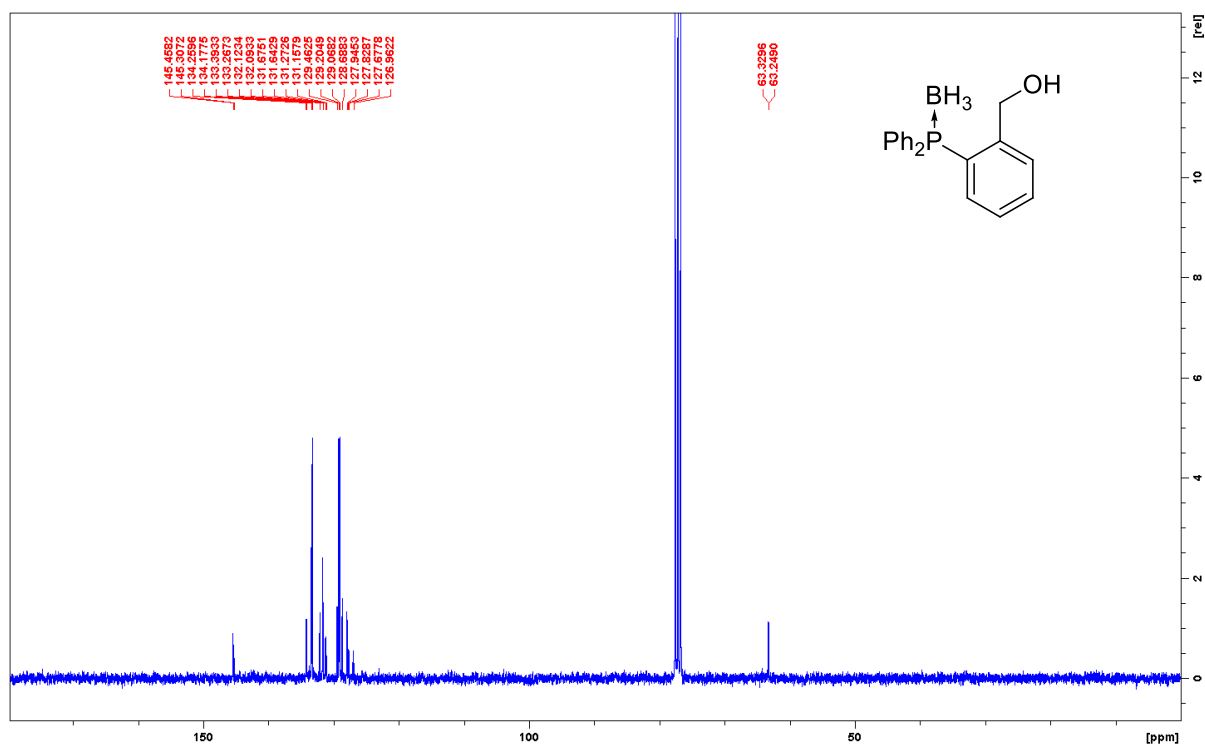

$^{13}\text{C}\{^1\text{H}\}$  NMR (75 MHz, Chloroform- $d$ )

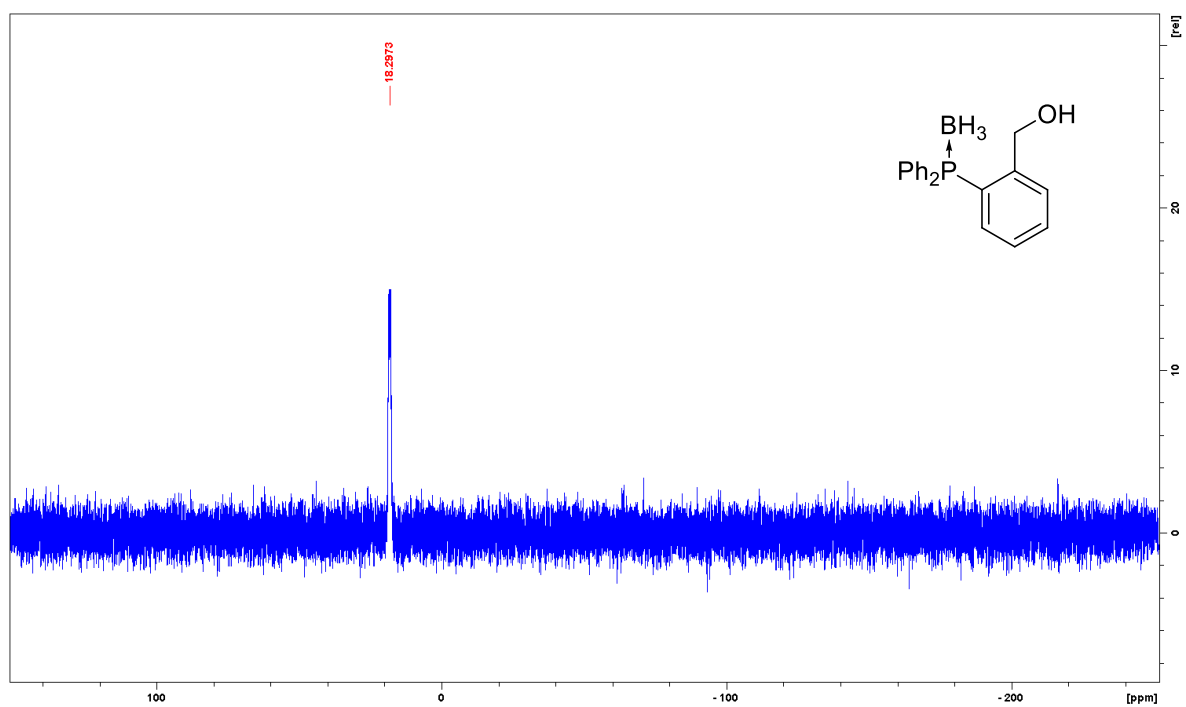

$^{31}\text{P}\{^1\text{H}\}$  NMR (202 MHz, Methylene Chloride- $d_2$ )

3.  $^1\text{H}$ ,  $^{13}\text{C}\{^1\text{H}\}$  and  $^{31}\text{P}\{^1\text{H}\}$  NMR spectra of compound **4**

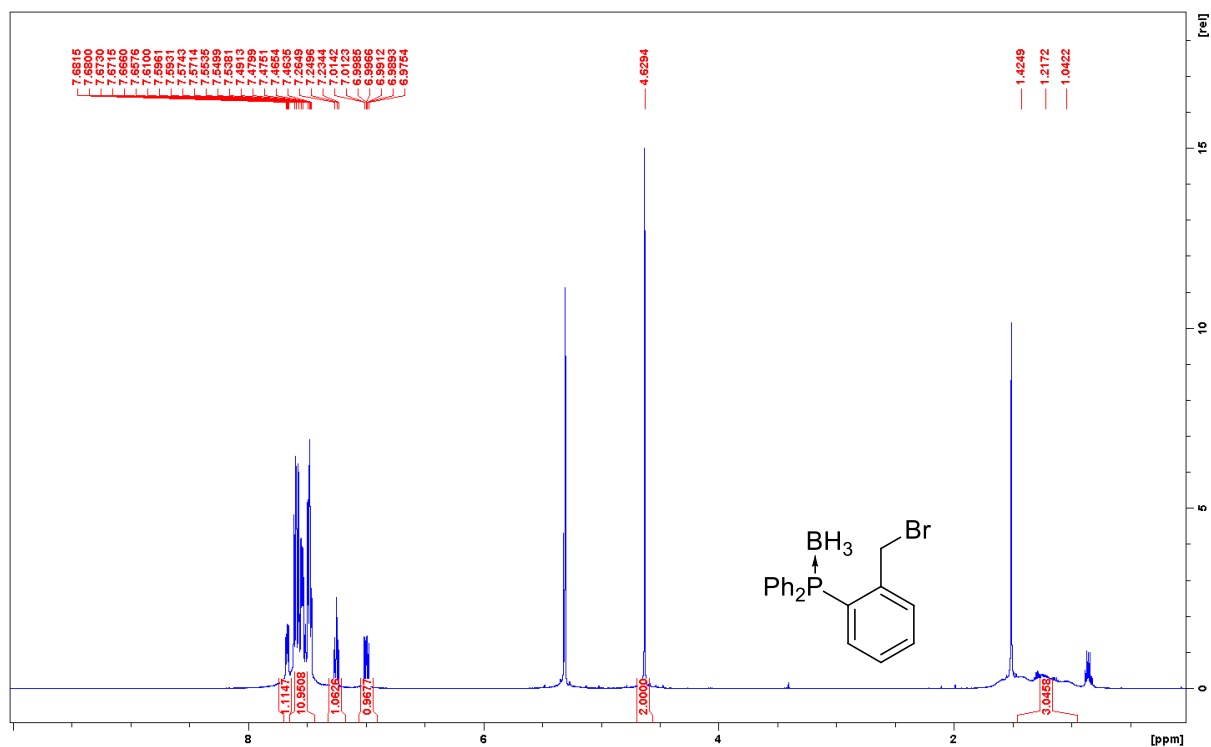

$^1\text{H}$  NMR (500 MHz, Methylenedichloride- $d_2$ )

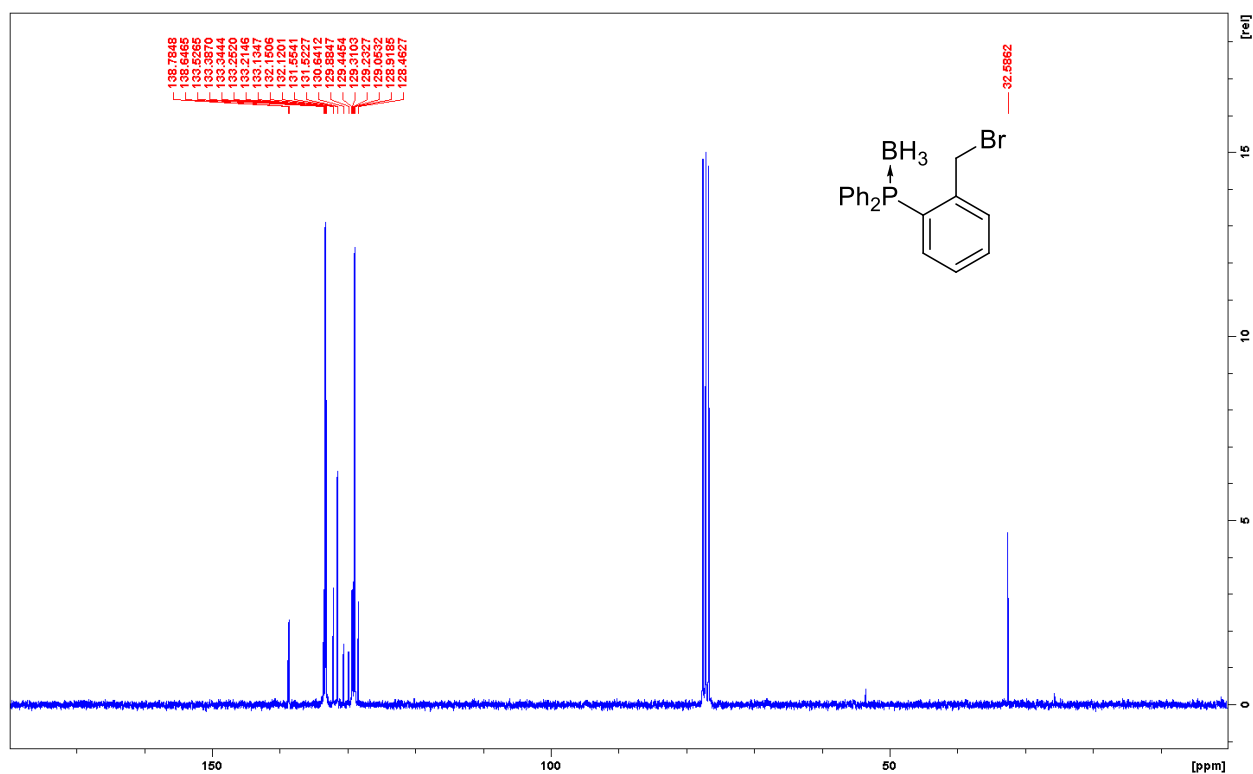

$^{13}\text{C}\{^1\text{H}\}$  NMR (75 MHz, Chloroform- $d$ )

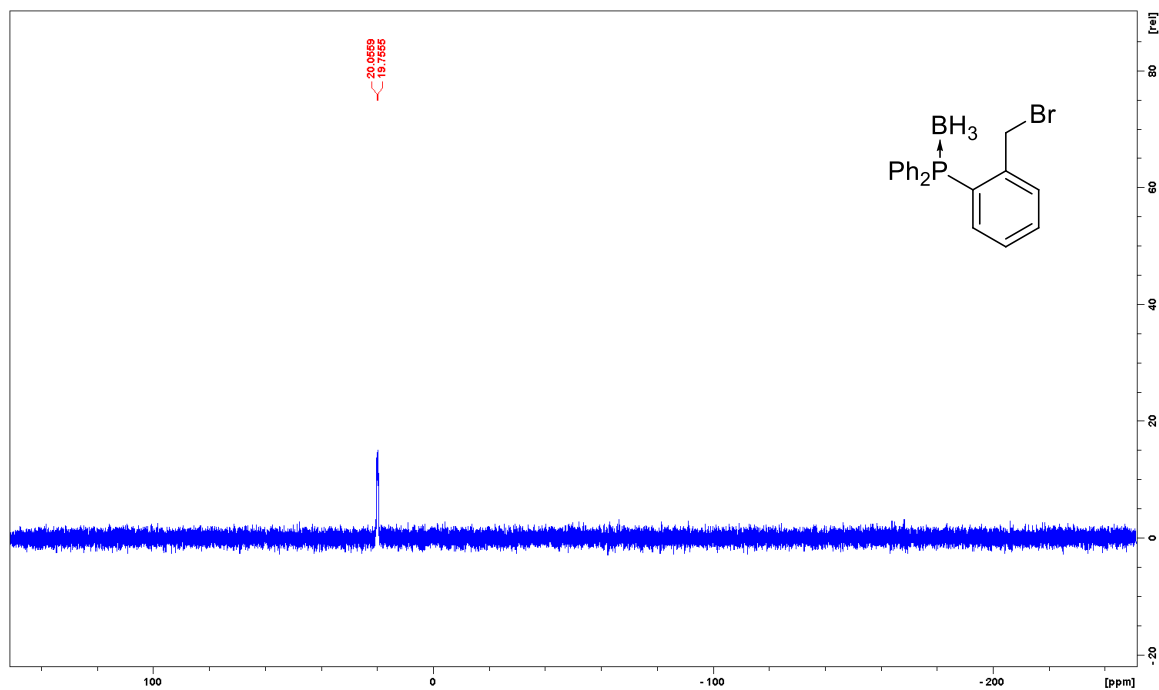

$^{31}\text{P}\{^1\text{H}\}$  NMR (202 MHz, Methylene Chloride- $d_2$ )

4.  $^1\text{H}$ ,  $^{13}\text{C}\{^1\text{H}\}$  and  $^{31}\text{P}\{^1\text{H}\}$  NMR spectra of compound **5a**

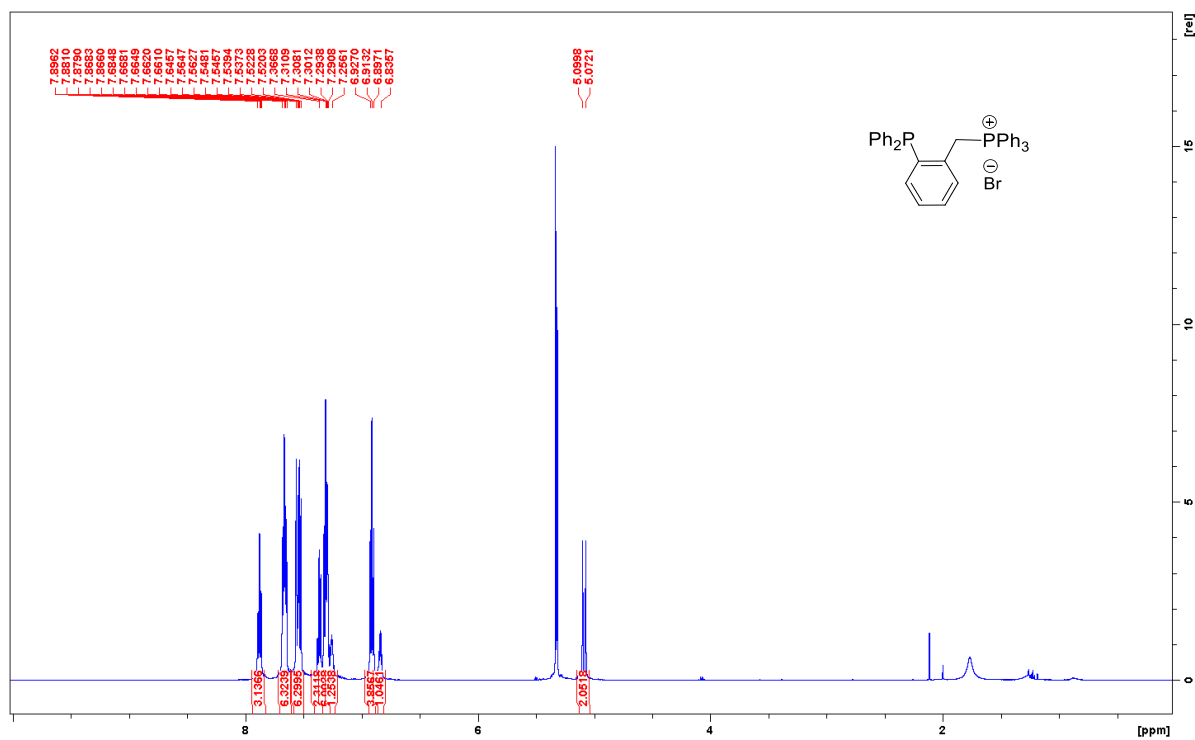<sup>1</sup>H NMR (500 MHz, Methylene Chloride-*d*<sub>2</sub>)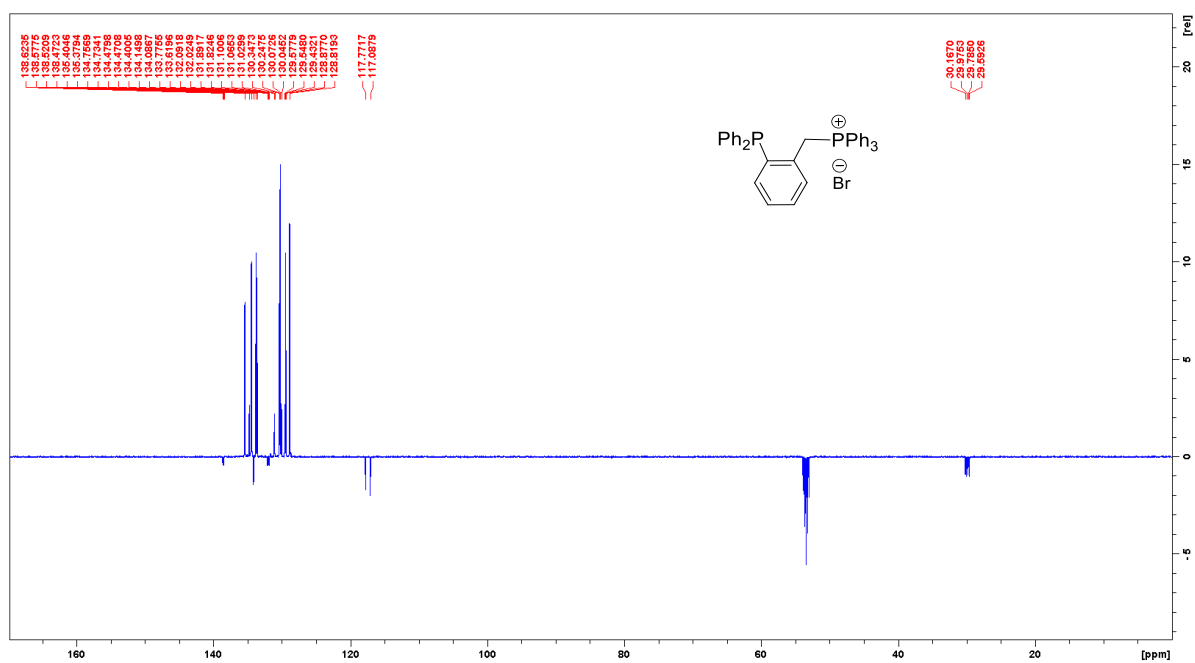 $^{13}\text{C}\{^1\text{H}\}$  J-mod NMR (75 MHz, Methylene Chloride- $d_2$ )

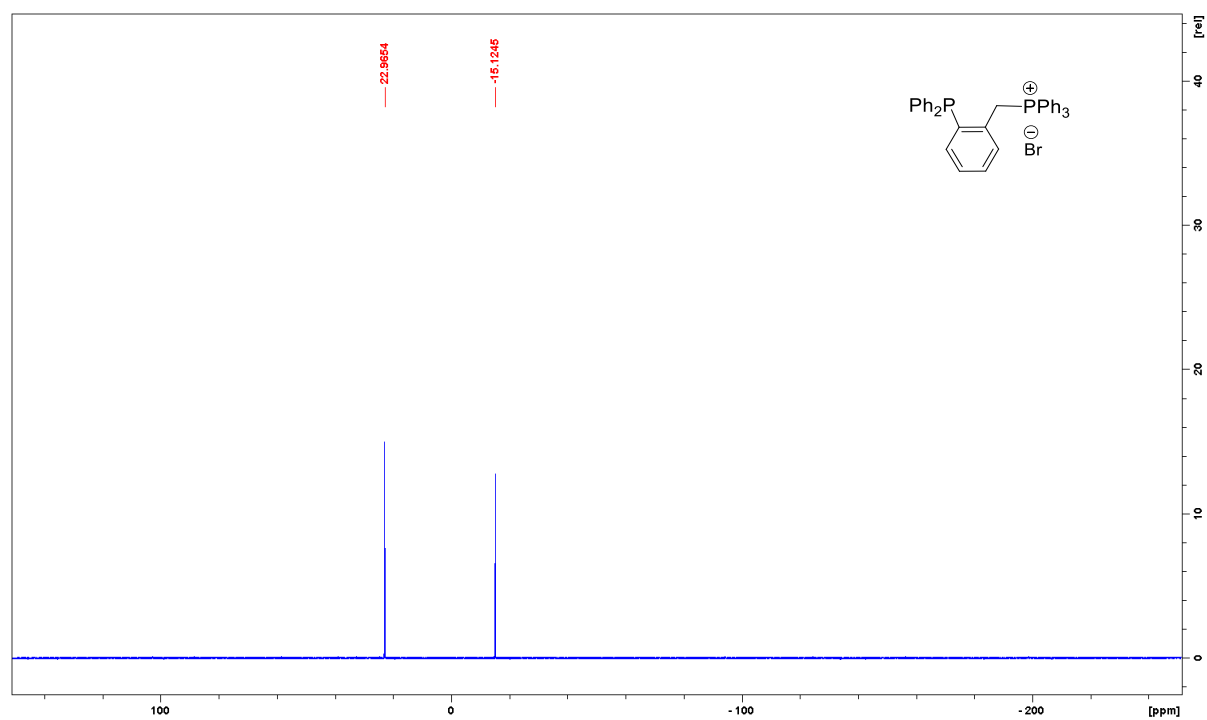

$^{31}\text{P}\{^1\text{H}\}$  NMR (202 MHz, Methylene Chloride- $d_2$ )

5.  $^1\text{H}$ ,  $^{13}\text{C}\{^1\text{H}\}$  and  $^{31}\text{P}\{^1\text{H}\}$  NMR spectra of compound **5b**

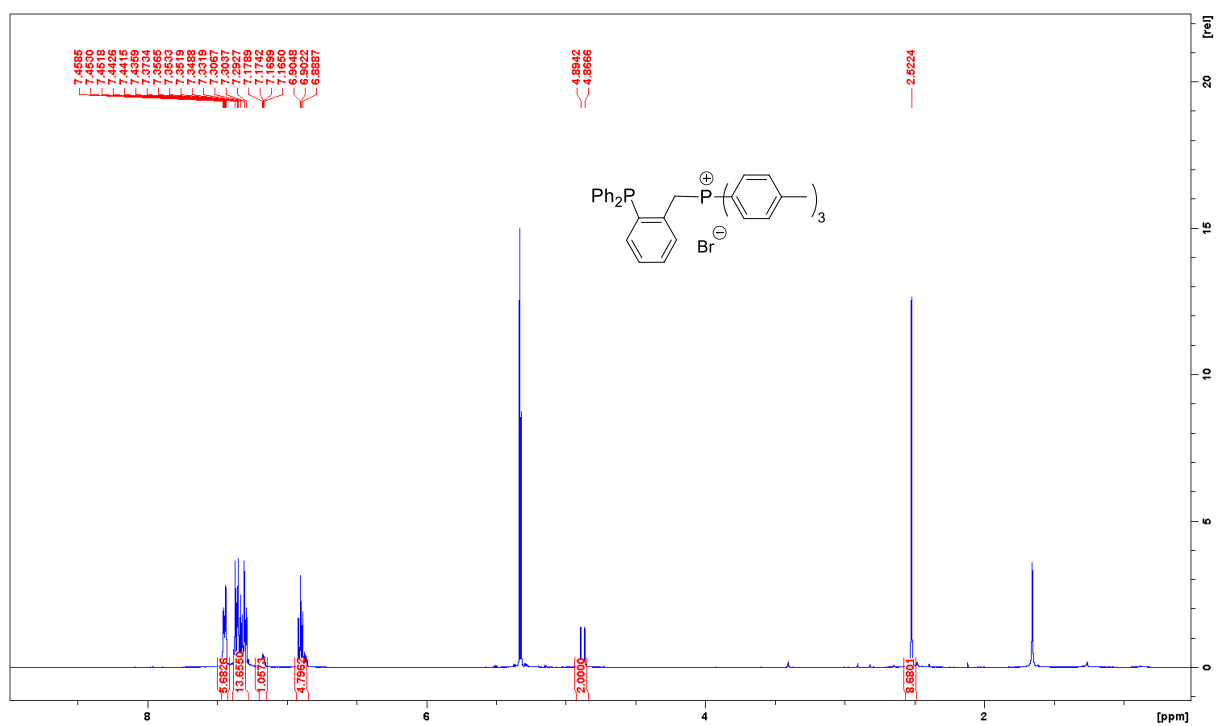

$^1\text{H}$  NMR (500 MHz, Methylene Chloride- $d_2$ )

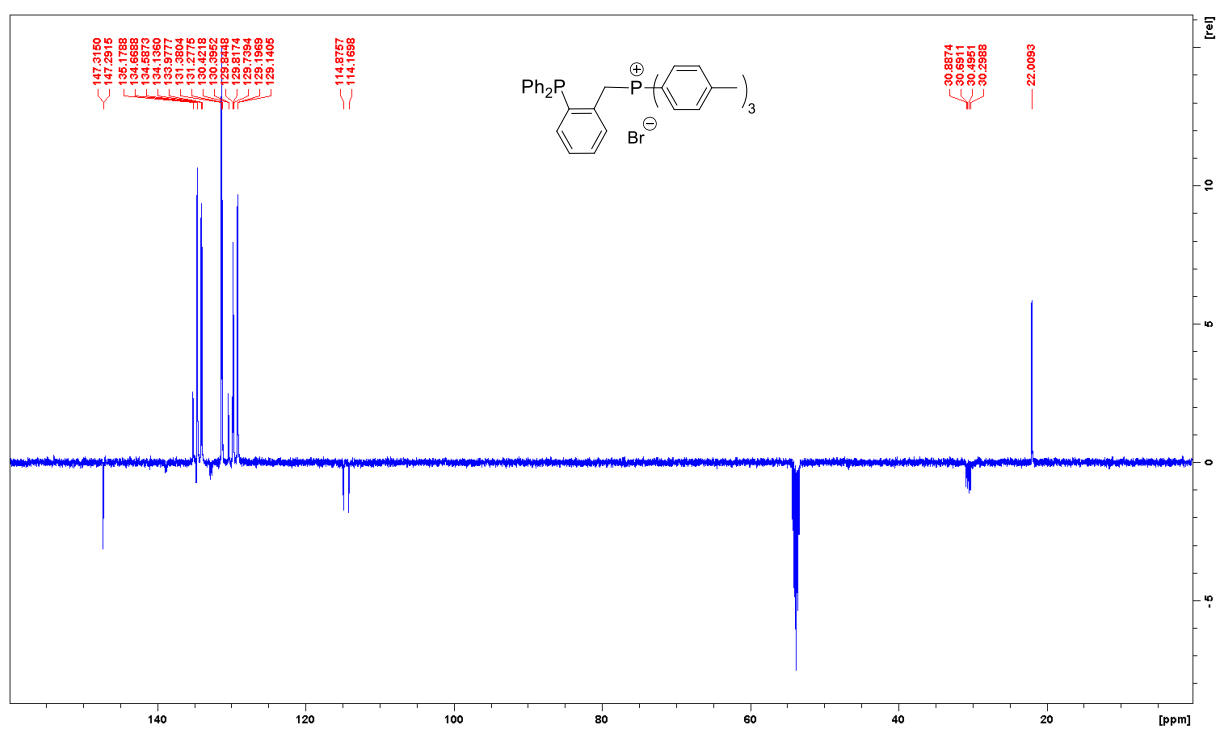

$^{13}\text{C}\{^1\text{H}\}$  J-mod NMR (75 MHz, Methylene Chloride- $d_2$ )

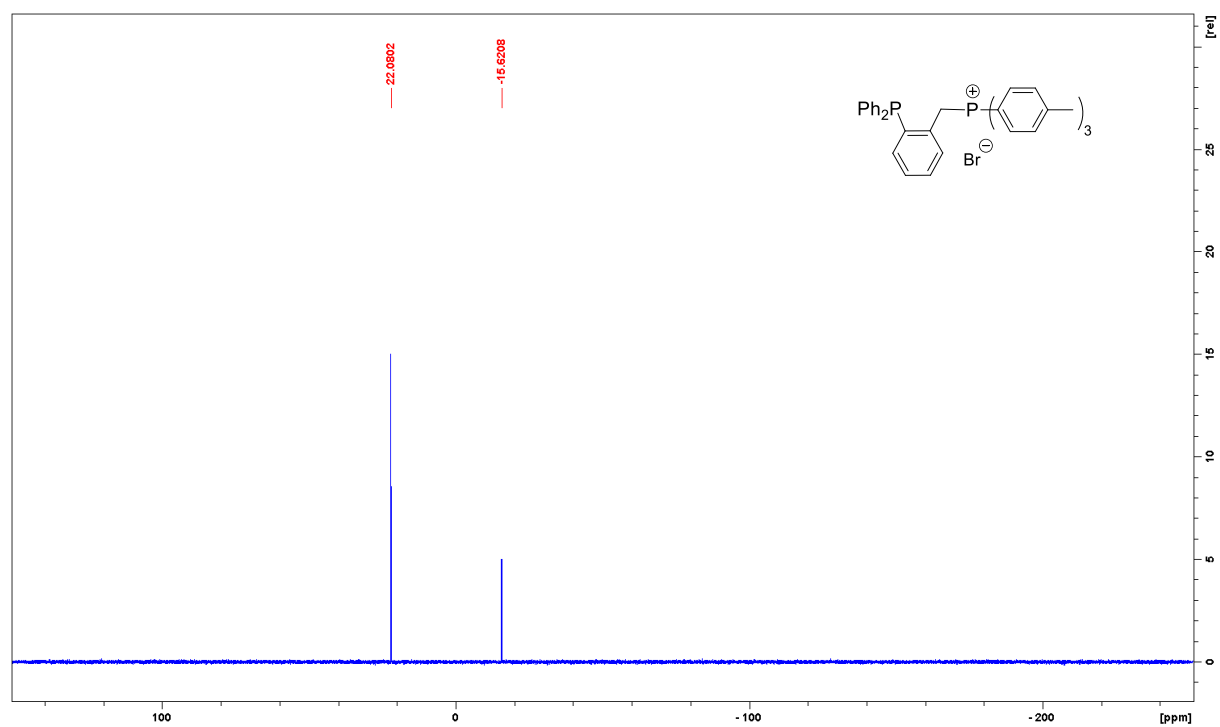

$^{31}\text{P}\{^1\text{H}\}$  NMR (202 MHz, Methylene Chloride- $d_2$ )

6.  $^1\text{H}$ ,  $^{13}\text{C}\{^1\text{H}\}$  and  $^{31}\text{P}\{^1\text{H}\}$  NMR spectra of compound **5c**

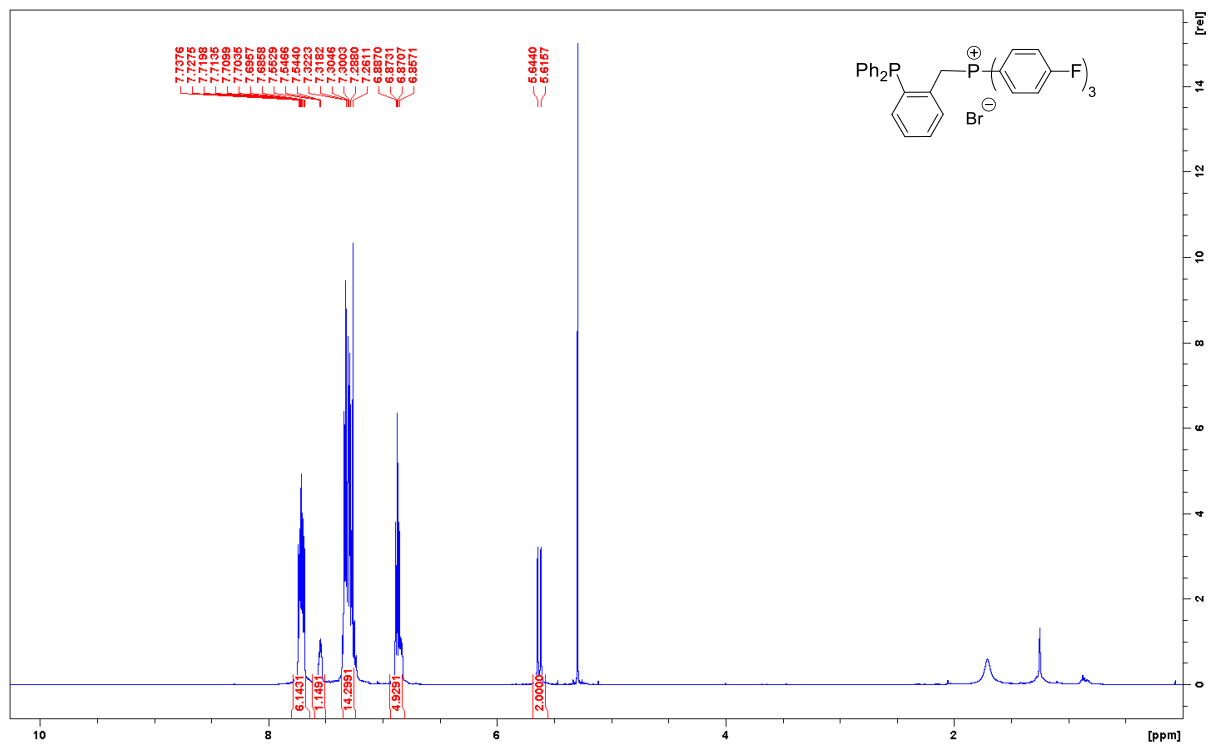

$^1\text{H}$  NMR (500 MHz, Methylene Chloride- $d_2$ )

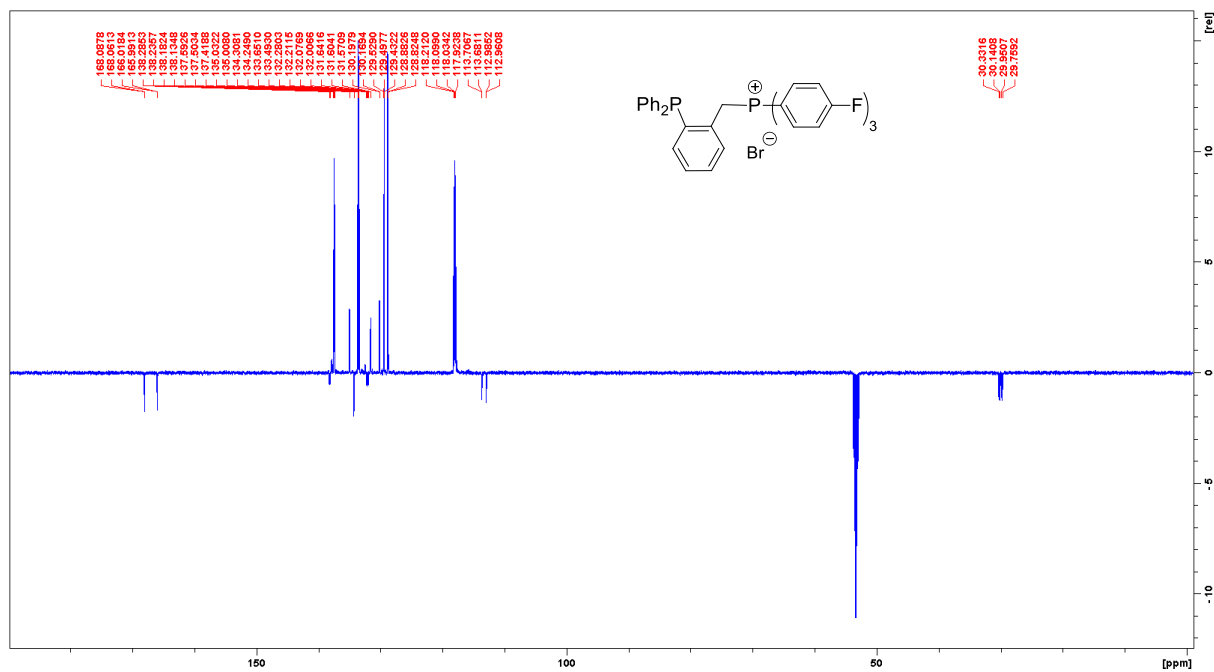

$^{13}\text{C}\{^1\text{H}\}$  J-mod NMR (75 MHz, Methylene Chloride- $d_2$ )

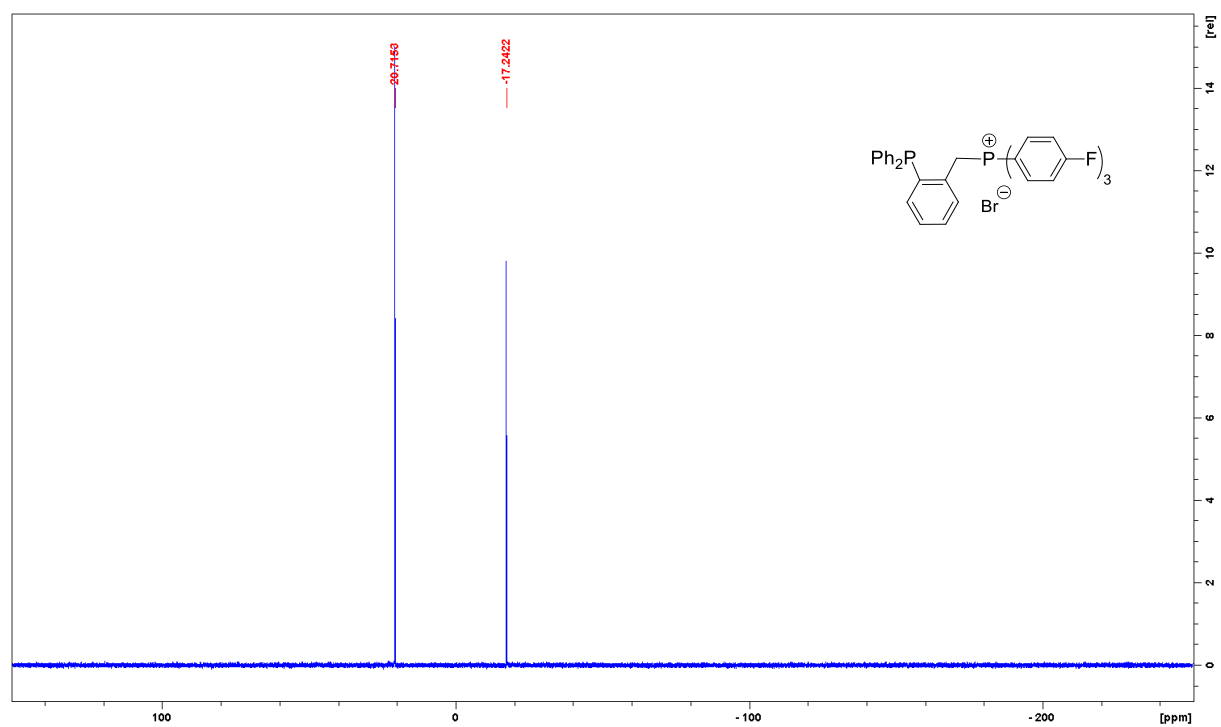

$^{31}\text{P}\{^1\text{H}\}$  NMR (202 MHz, Methylene Chloride- $d_2$ )

7.  $^1\text{H}$ ,  $^{13}\text{C}\{^1\text{H}\}$  and  $^{31}\text{P}\{^1\text{H}\}$  NMR spectra of compound **5d**

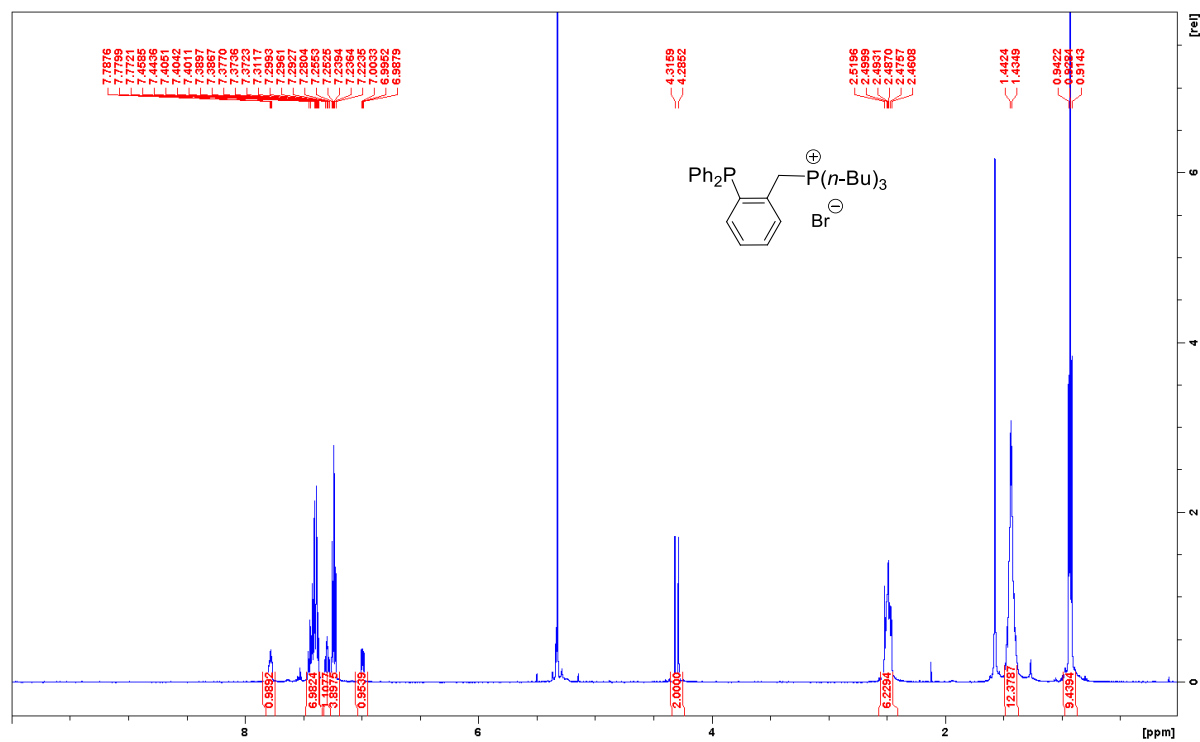

$^1\text{H}$  NMR (500 MHz, Methylene Chloride- $d_2$ )

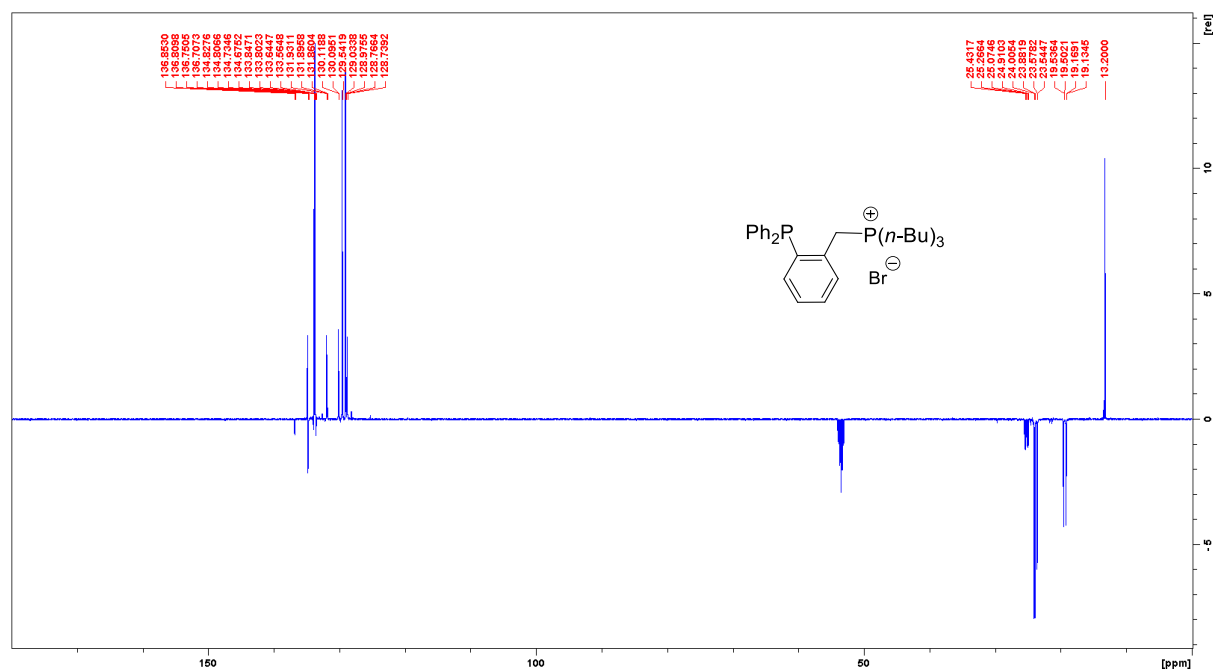

$^{13}\text{C}\{^1\text{H}\}$  J-mod NMR (75 MHz, Methylene Chloride- $d_2$ )

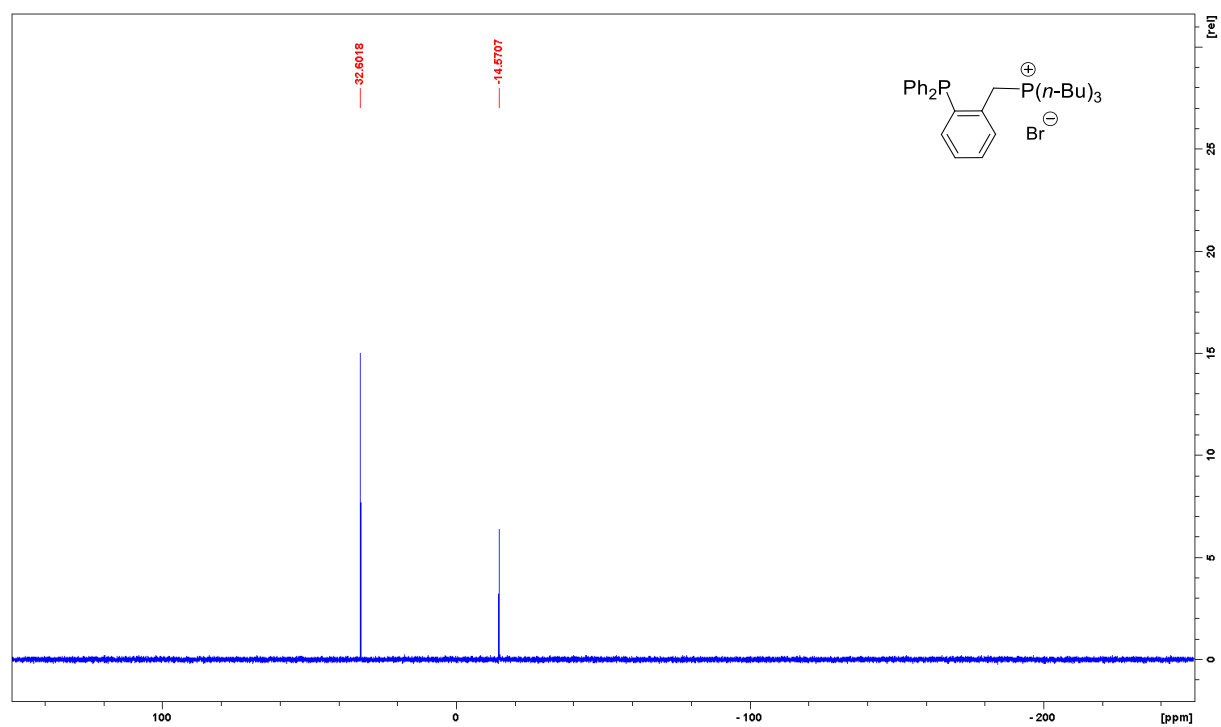

$^{31}\text{P}\{^1\text{H}\}$  NMR (202 MHz, Methylene Chloride- $d_2$ )

8.  $^1\text{H}$ ,  $^{13}\text{C}\{^1\text{H}\}$  and  $^{31}\text{P}\{^1\text{H}\}$  NMR spectra of compound **5e**

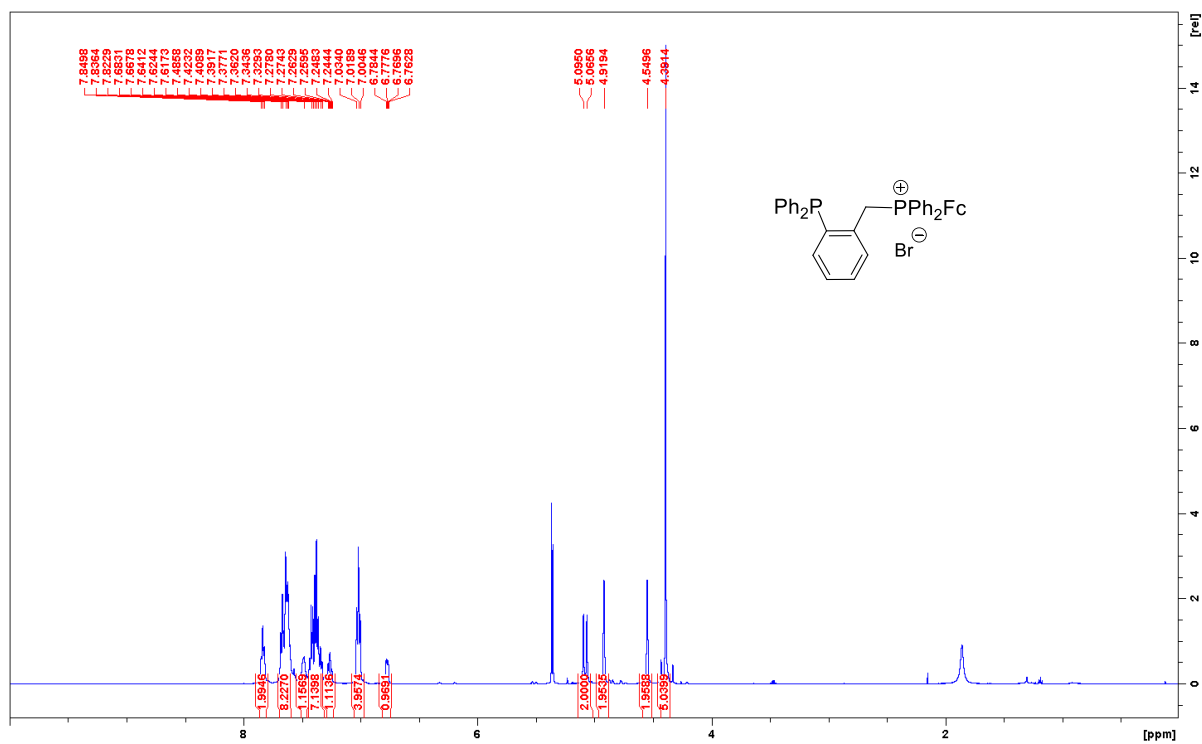

$^1\text{H}$  NMR (500 MHz, Methylene Chloride- $d_2$ )

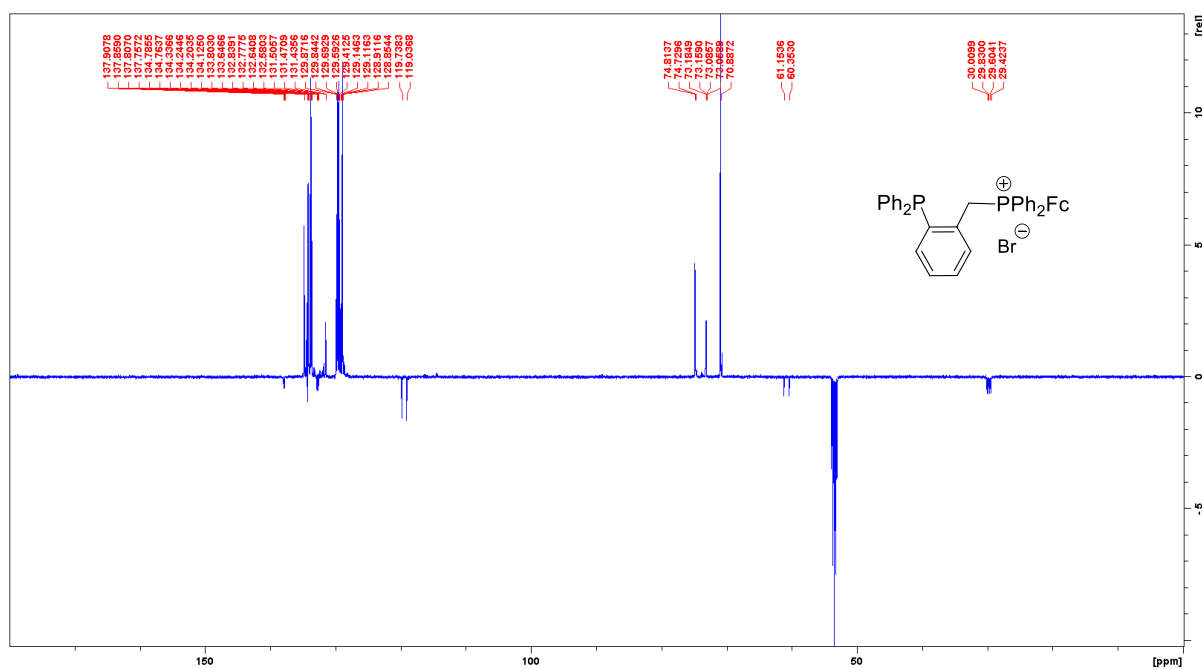

$^{13}\text{C}\{^1\text{H}\}$  J-mod NMR (75 MHz, Methylene Chloride- $d_2$ )

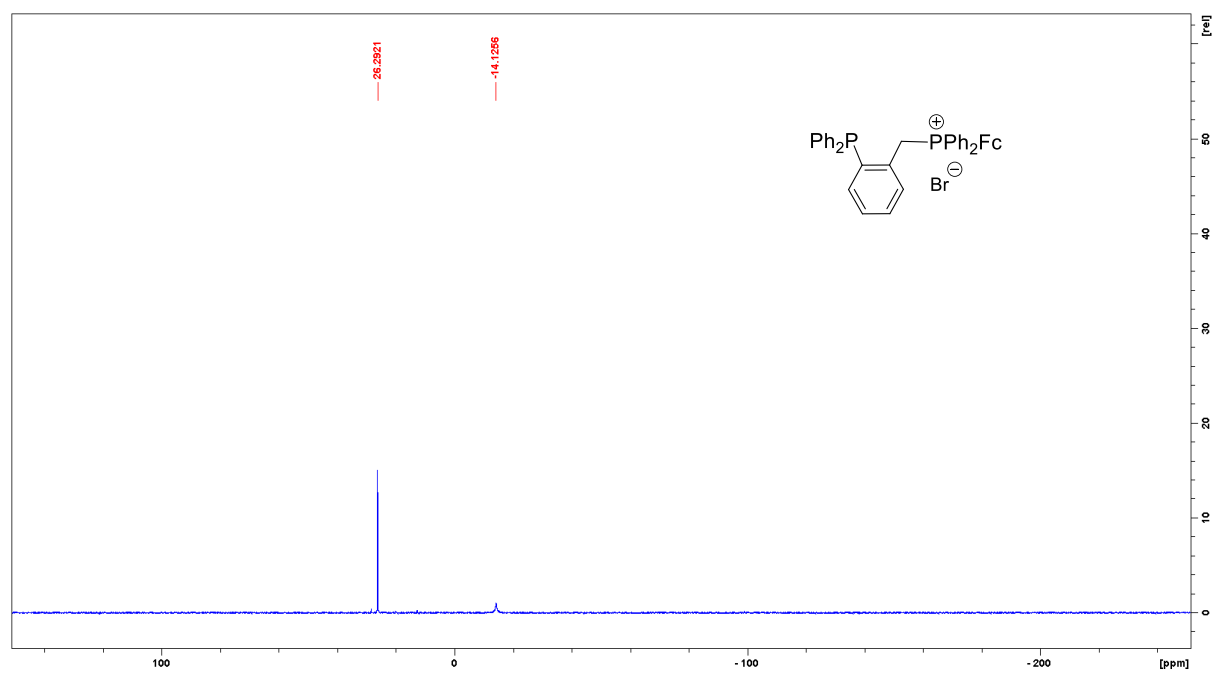

<sup>31</sup>P{<sup>1</sup>H} NMR (202 MHz, Methylene Chloride-*d*<sub>2</sub>)

9.  $^1\text{H}$ ,  $^{13}\text{C}\{^1\text{H}\}$  and  $^{31}\text{P}\{^1\text{H}\}$  NMR spectra of compound **5f**

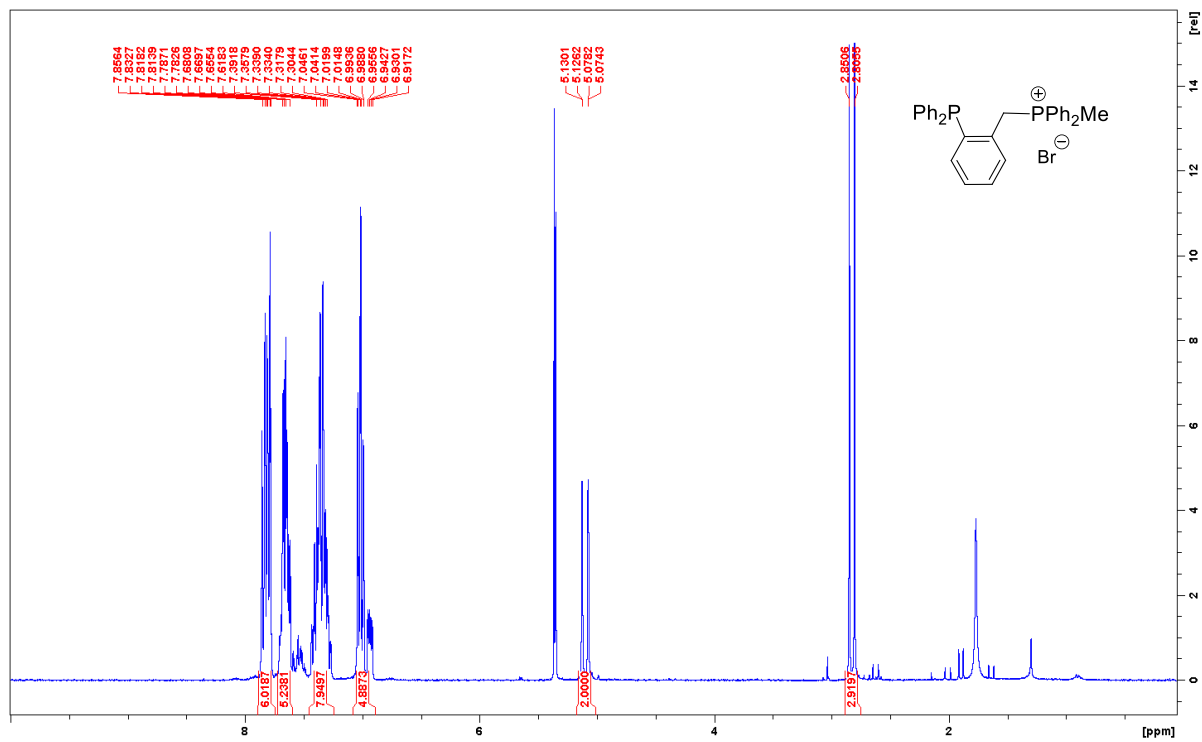

$^1\text{H}$  NMR (300 MHz, Methylene Chloride- $d_2$ )

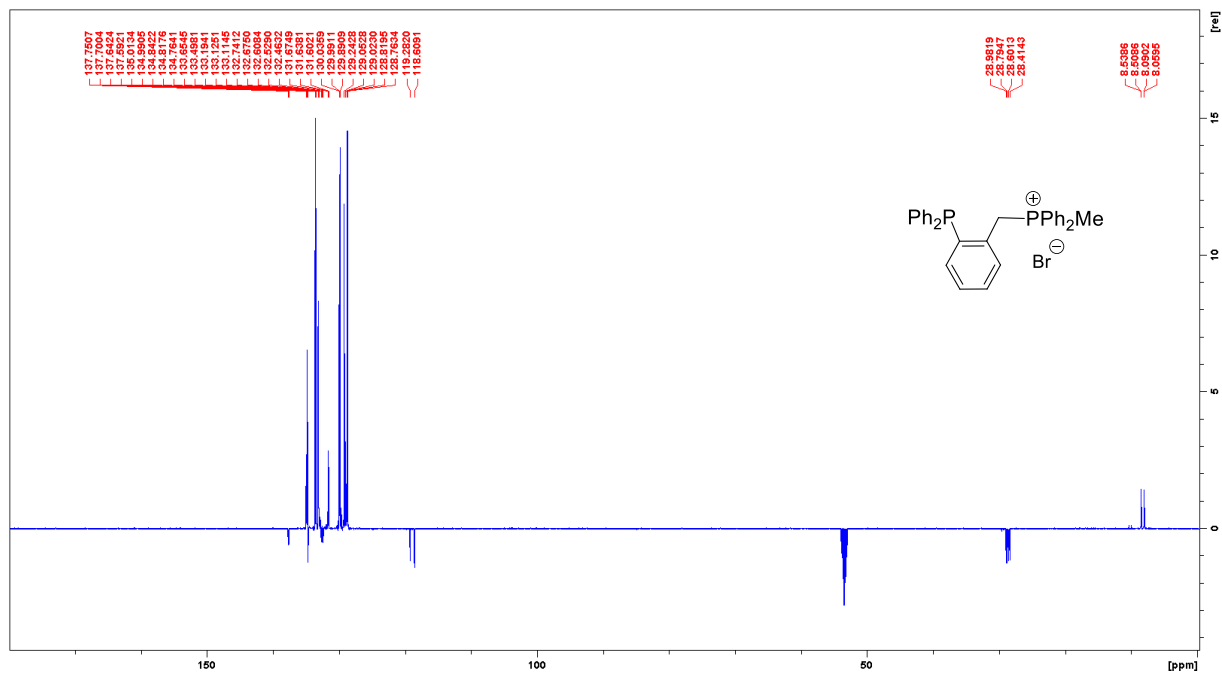

$^{13}\text{C}\{^1\text{H}\}$  J-mod NMR (125.7 MHz, Methylene Chloride- $d_2$ )

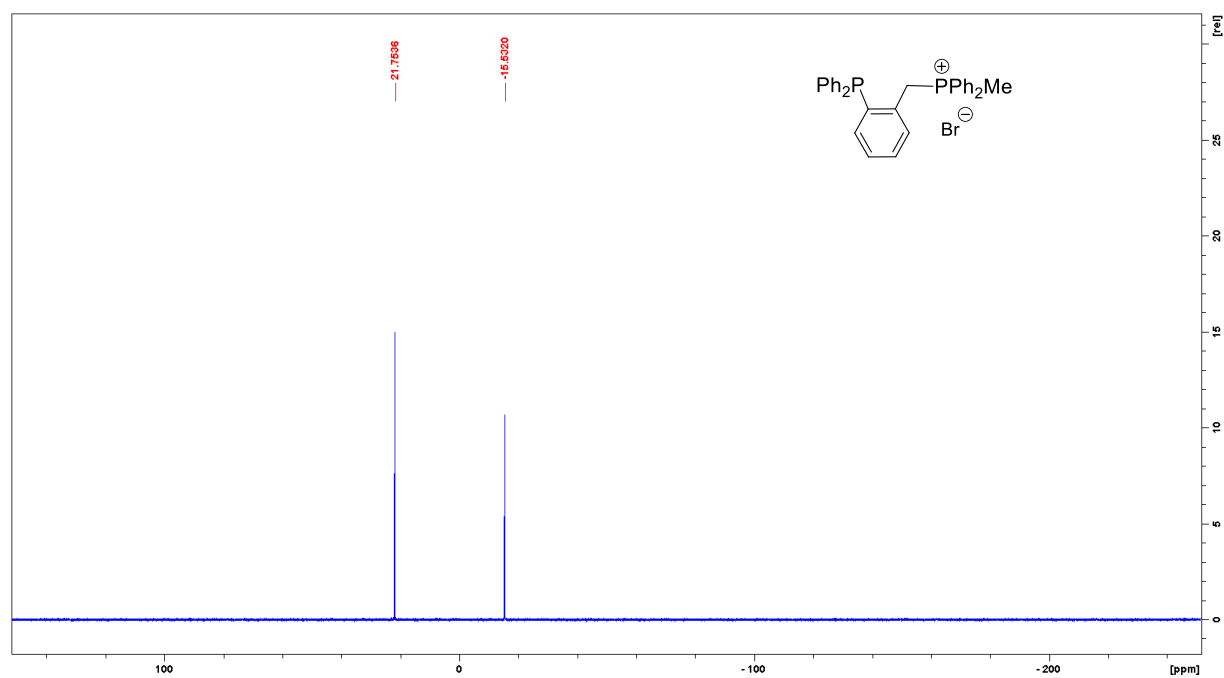

<sup>31</sup>P{<sup>1</sup>H} NMR (121.5 MHz, Methylene Chloride-*d*<sub>2</sub>)

10.  $^1\text{H}$ ,  $^{13}\text{C}\{^1\text{H}\}$  and  $^{31}\text{P}\{^1\text{H}\}$  NMR spectra of compound **1a**

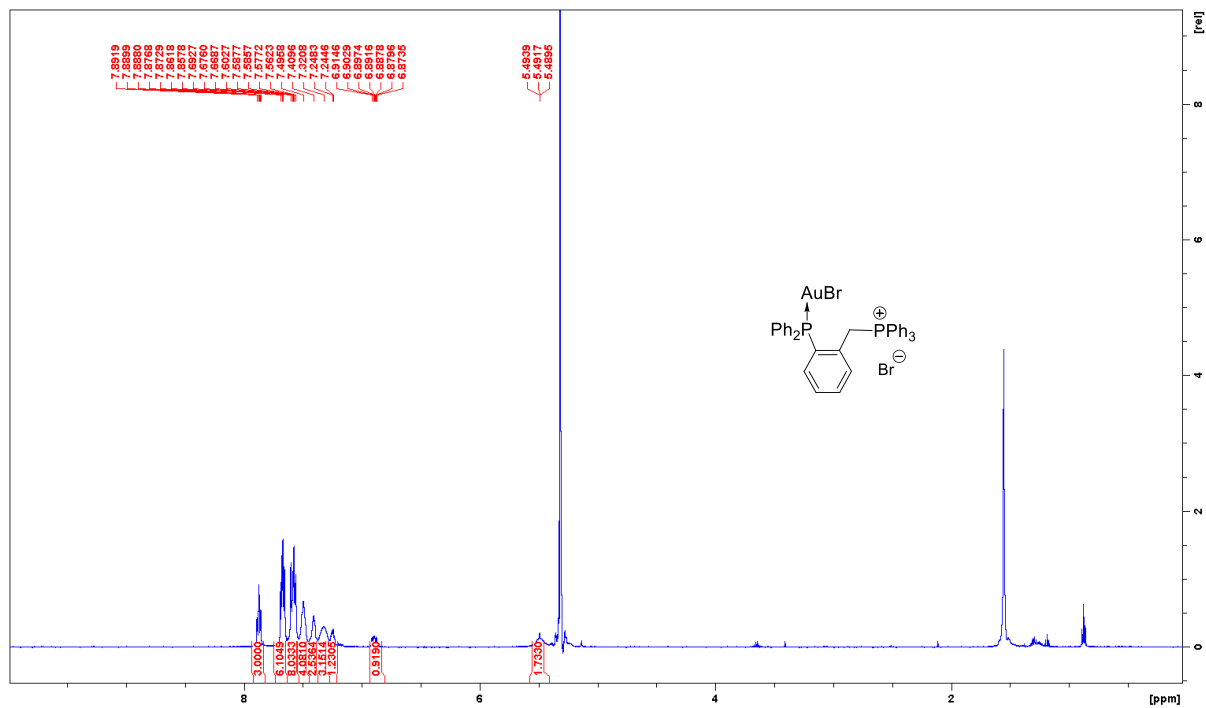

$^1\text{H}$  NMR (500 MHz, Methylene Chloride- $d_2$ )

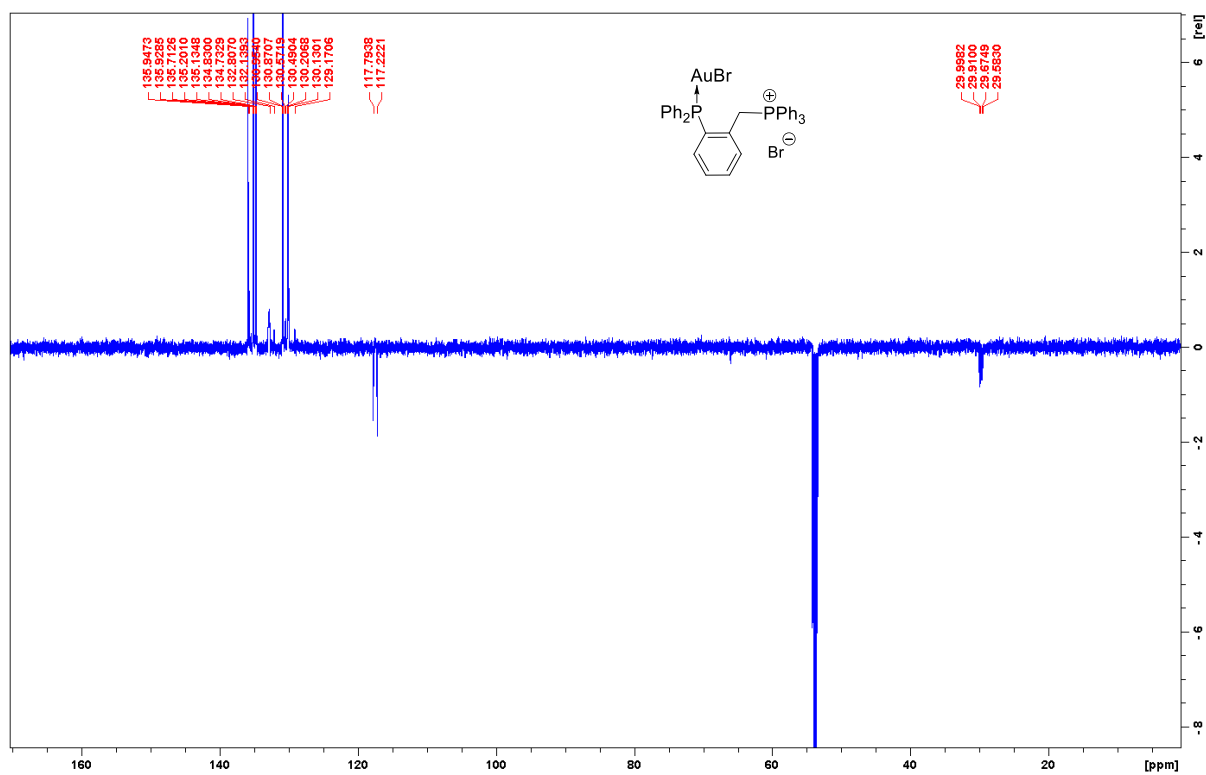

$^{13}\text{C}\{^1\text{H}\}$  J-mod NMR (151 MHz, Methylene Chloride- $d_2$ )

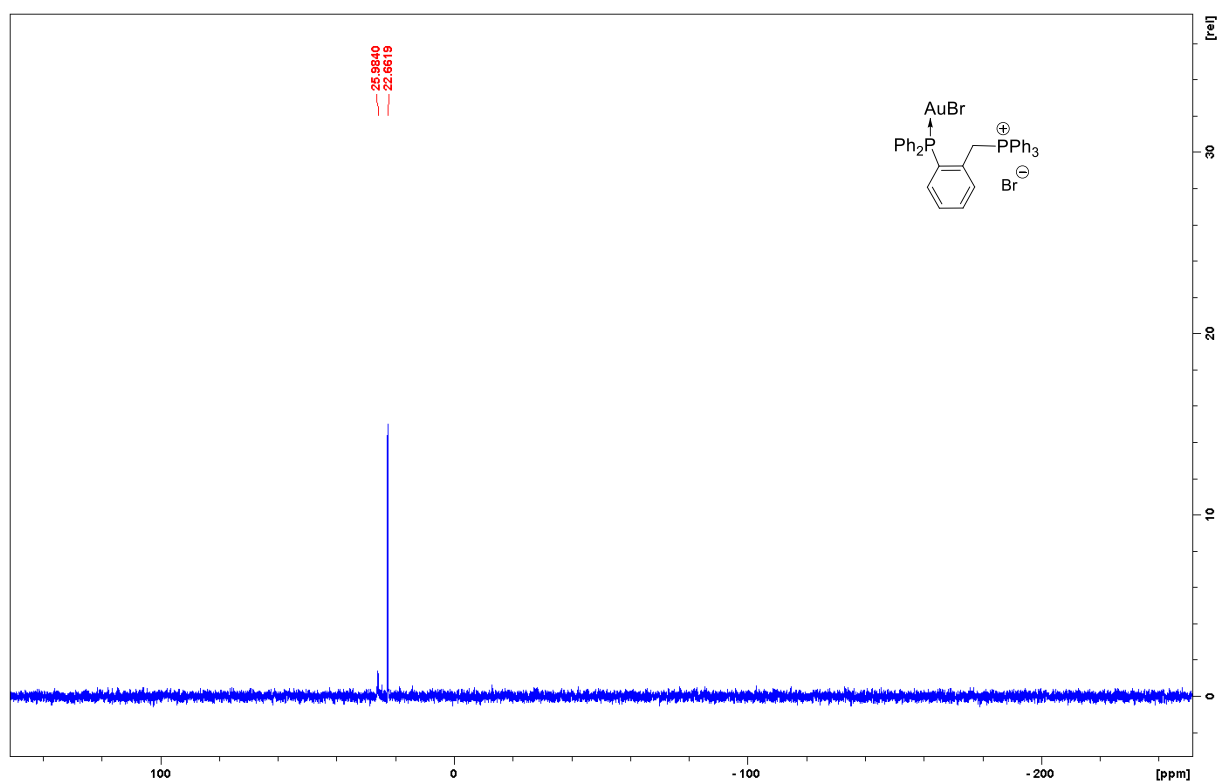

$^{31}\text{P}\{^1\text{H}\}$  NMR (202 MHz, Methylene Chloride- $d_2$ )

11.  $^1\text{H}$ ,  $^{13}\text{C}\{^1\text{H}\}$  and  $^{31}\text{P}\{^1\text{H}\}$  NMR spectra of compound **1b**

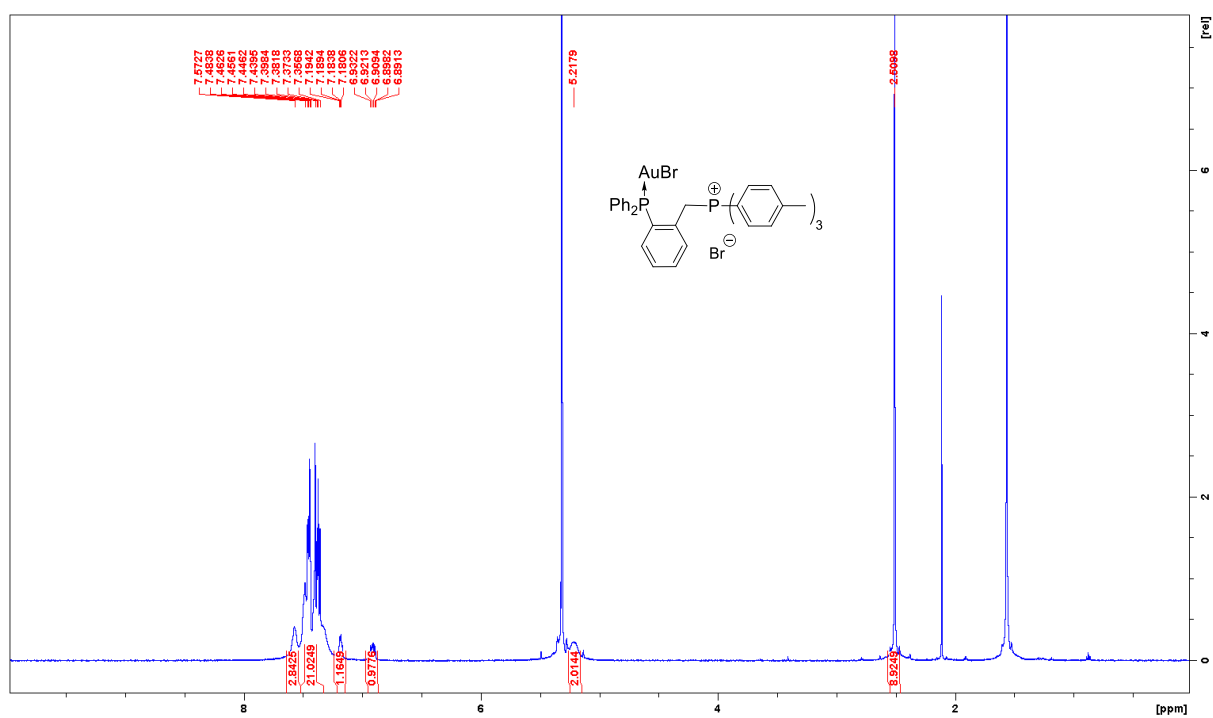<sup>1</sup>H NMR (500 MHz, Methylene Chloride-*d*<sub>2</sub>)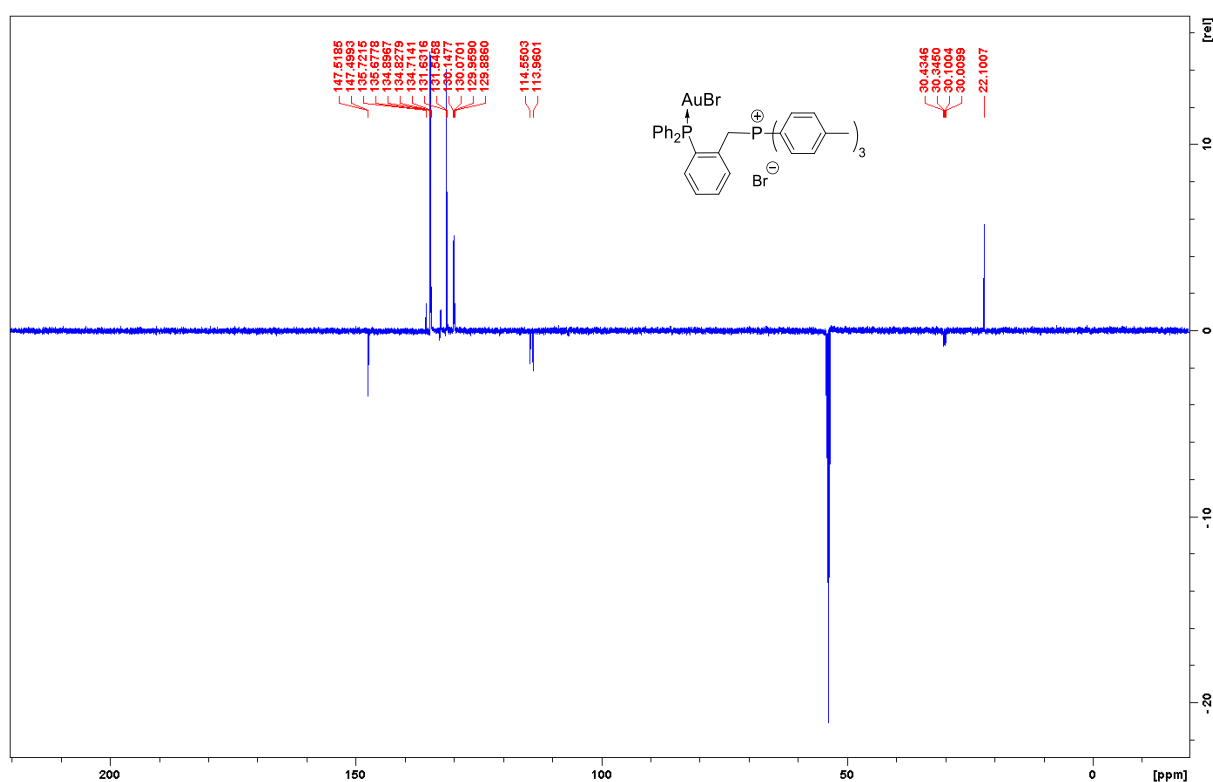 $^{13}\text{C}\{^1\text{H}\}$  J-mod NMR (151 MHz, Methylene Chloride- $d_2$ )

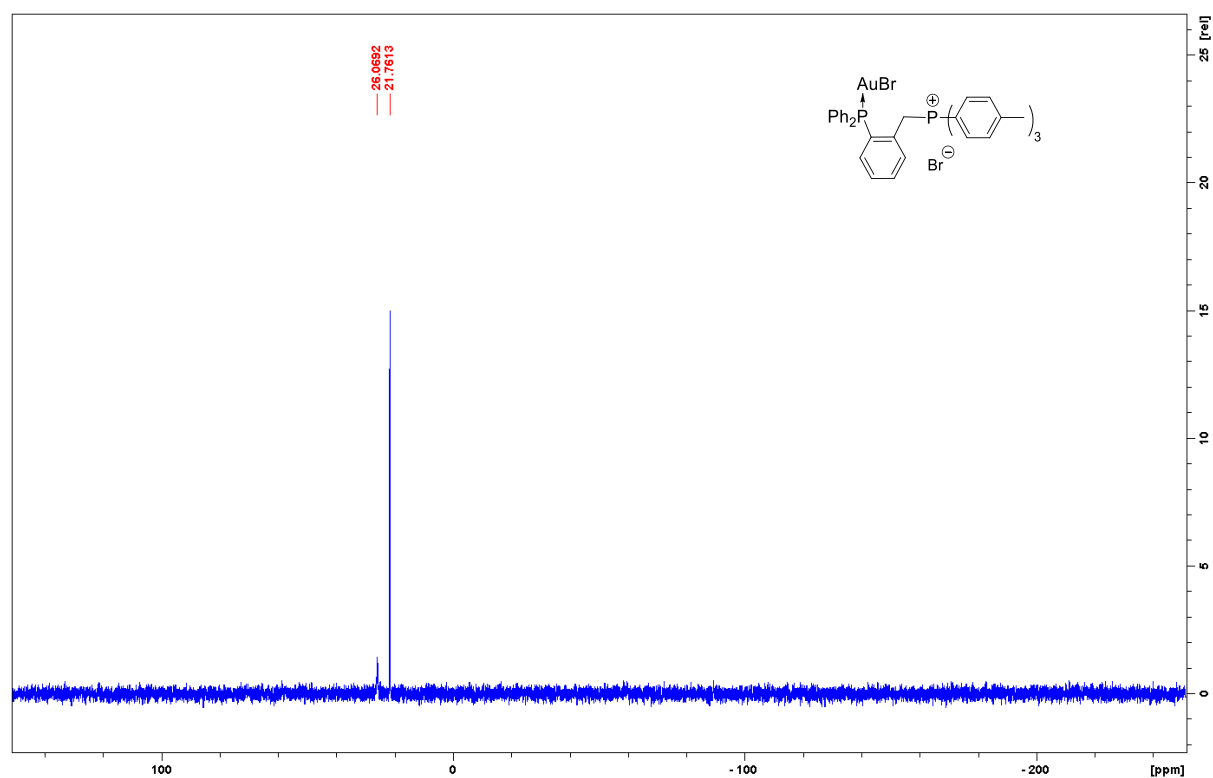

$^{31}\text{P}\{^1\text{H}\}$  NMR (202 MHz, Methylene Chloride- $d_2$ )

12.  $^1\text{H}$ ,  $^{13}\text{C}\{^1\text{H}\}$  and  $^{31}\text{P}\{^1\text{H}\}$  NMR spectra of compound **1c**

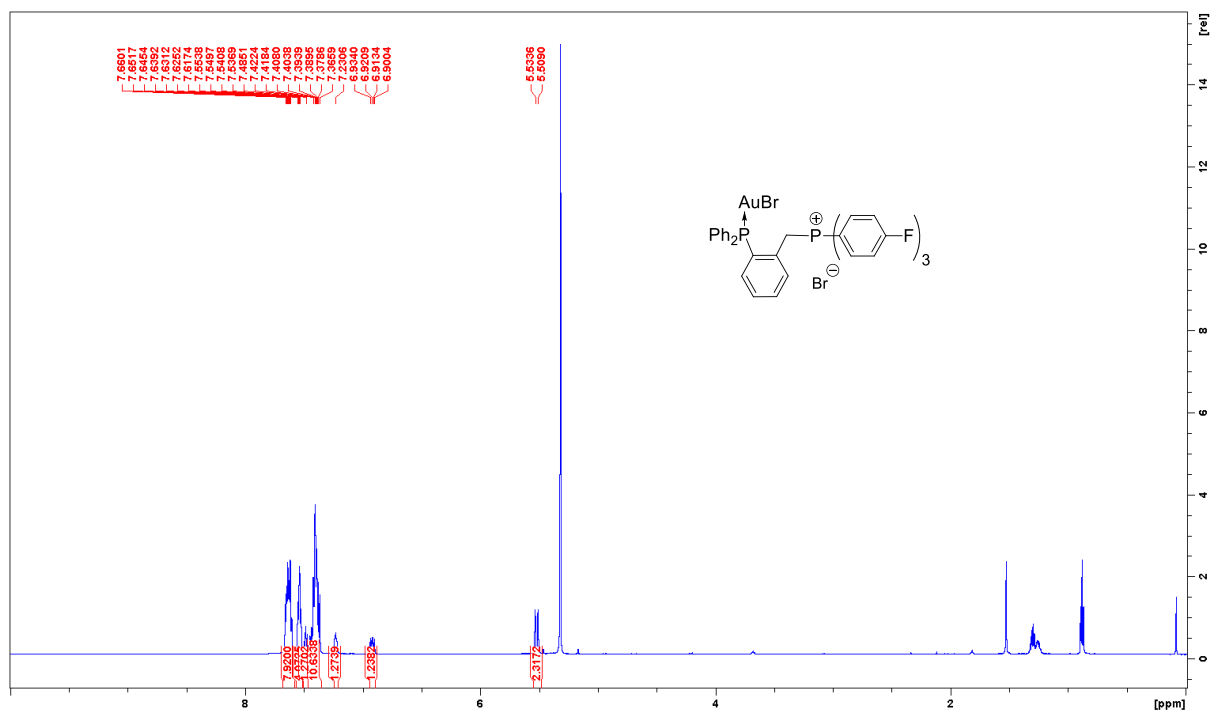

$^1\text{H}$  NMR (600 MHz, Methylene Chloride- $d_2$ )

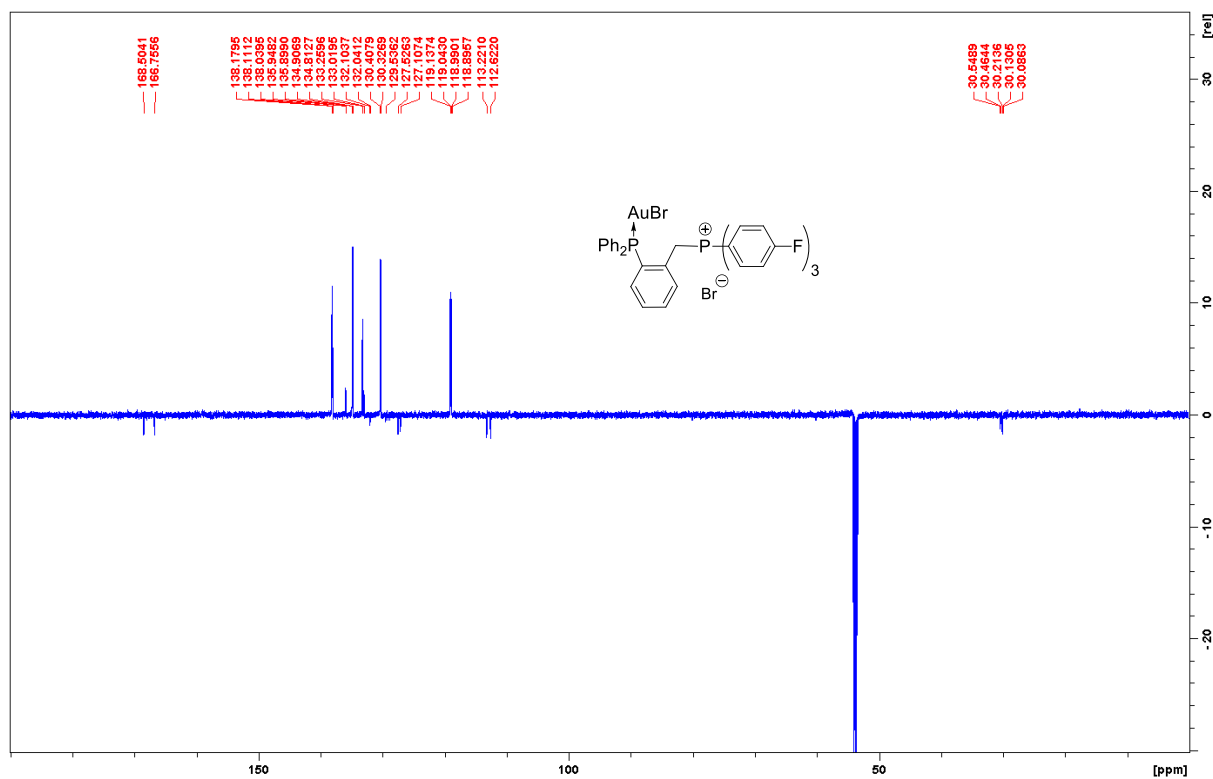

$^{13}\text{C}\{^1\text{H}\}$  J-mod NMR (151 MHz, Methylene Chloride- $d_2$ )

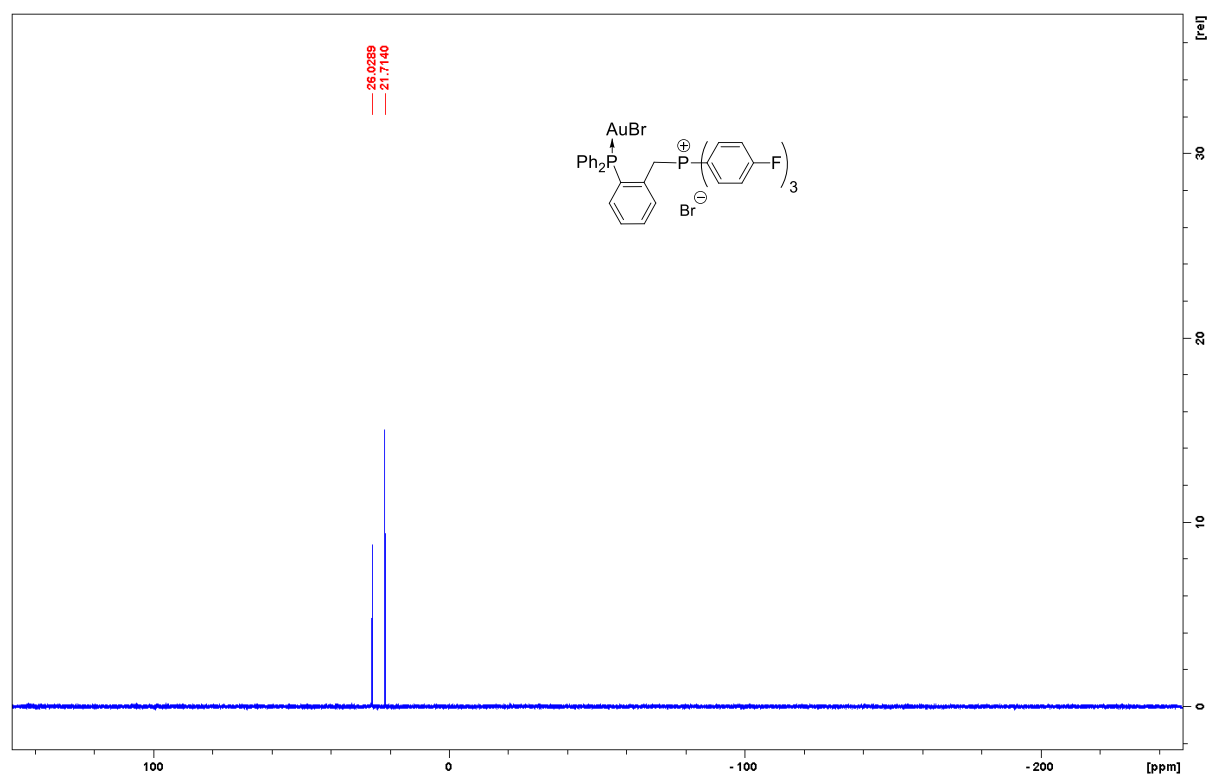

$^{31}\text{P}\{^1\text{H}\}$  NMR (243 MHz,  $\text{Methylene Chloride-}d_2$ )

13.  $^1\text{H}$ ,  $^{13}\text{C}\{^1\text{H}\}$  and  $^{31}\text{P}\{^1\text{H}\}$  NMR spectra of compound **Id**

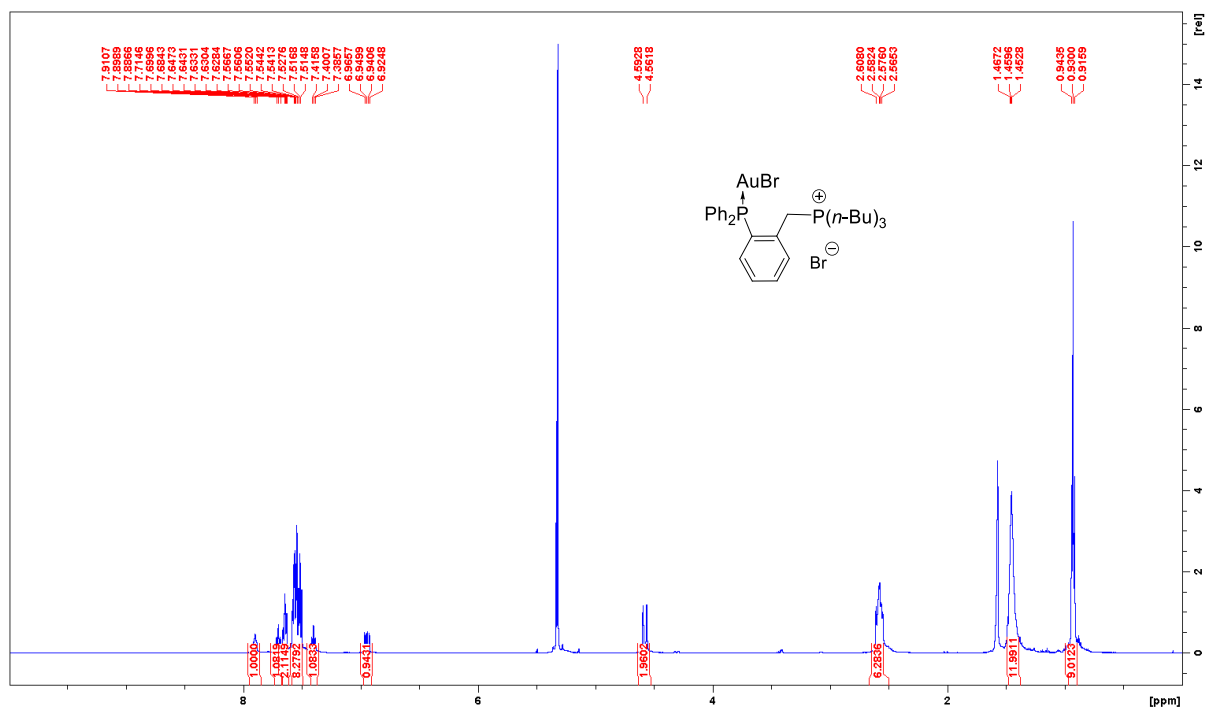

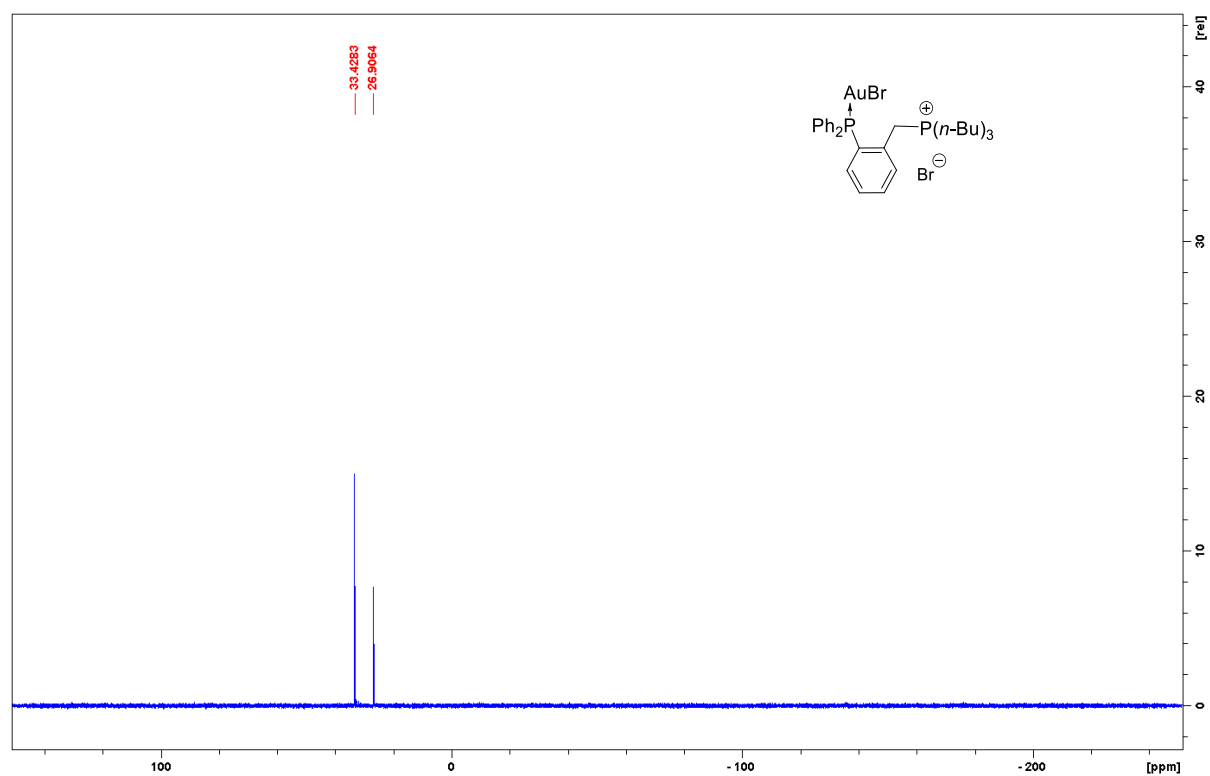

$^{31}\text{P}\{^1\text{H}\}$  NMR (202 MHz,  $\text{Methylene Chloride-}d_2$ )

14.  $^1\text{H}$ ,  $^{13}\text{C}\{^1\text{H}\}$  and  $^{31}\text{P}\{^1\text{H}\}$  NMR spectra of compound **1e**

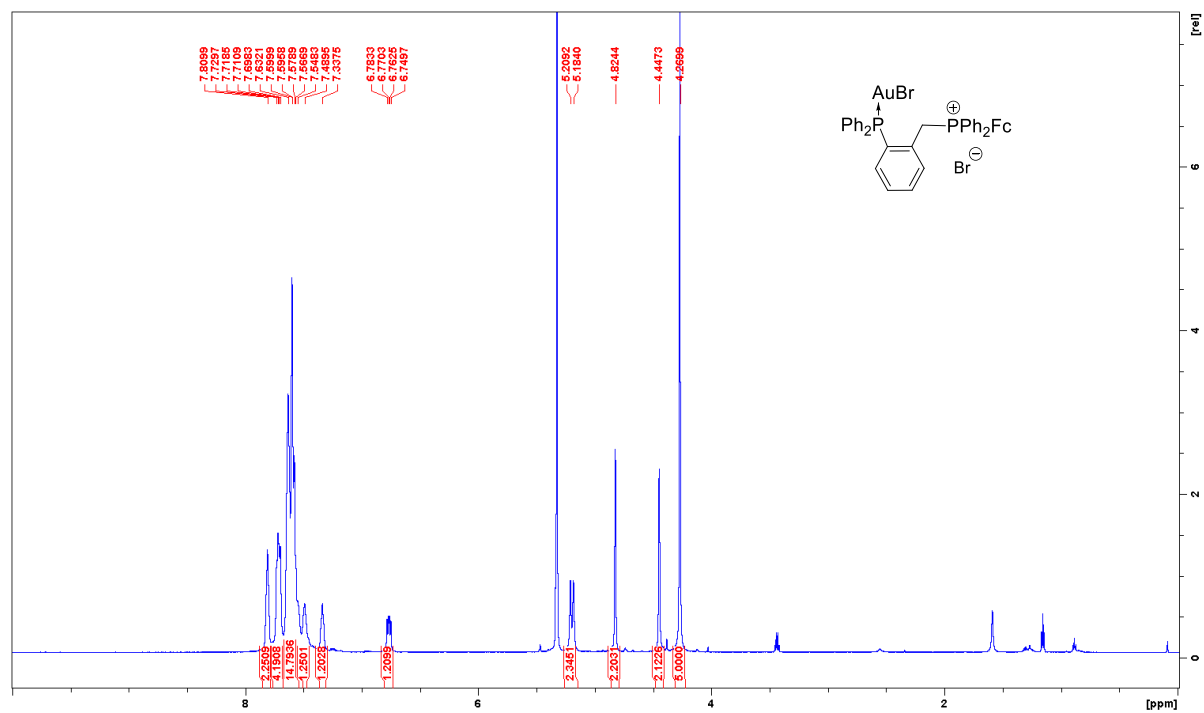

$^1\text{H}$  NMR (600 MHz, Methylene Chloride- $d_2$ )

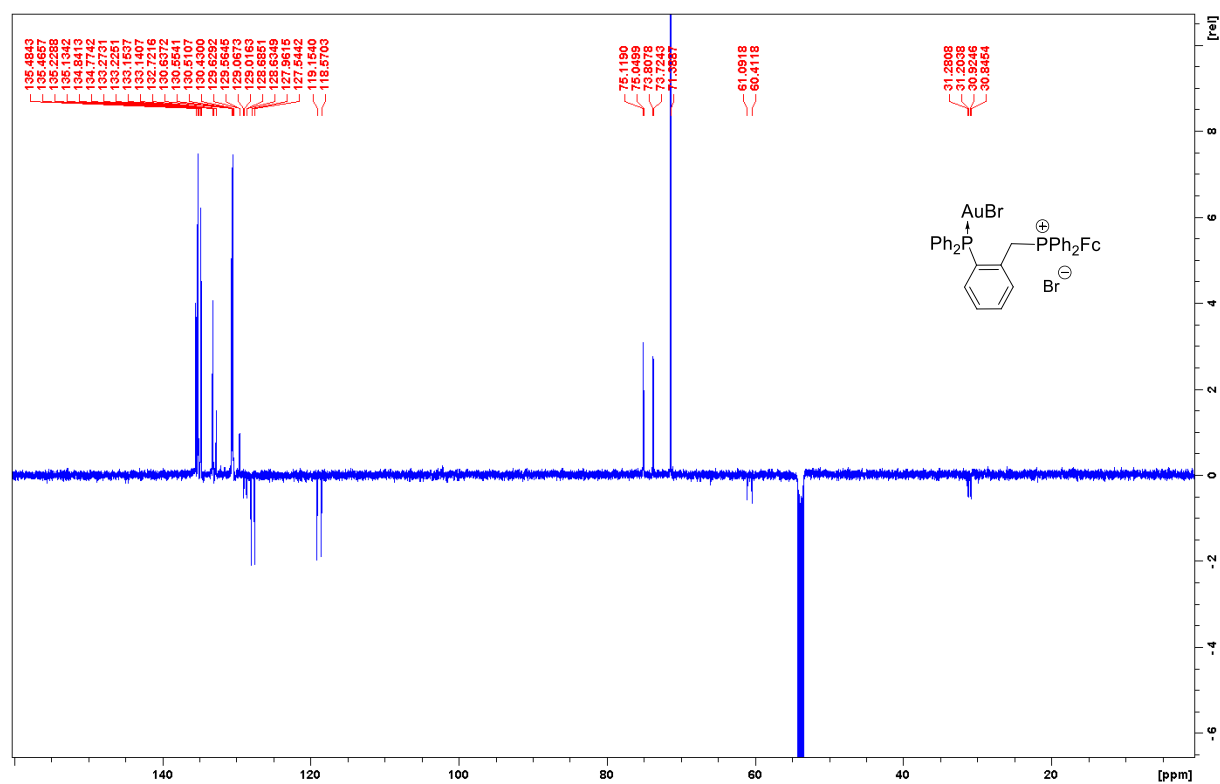

$^{13}\text{C}\{^1\text{H}\}$  J-mod NMR (151 MHz, Methylene Chloride- $d_2$ )

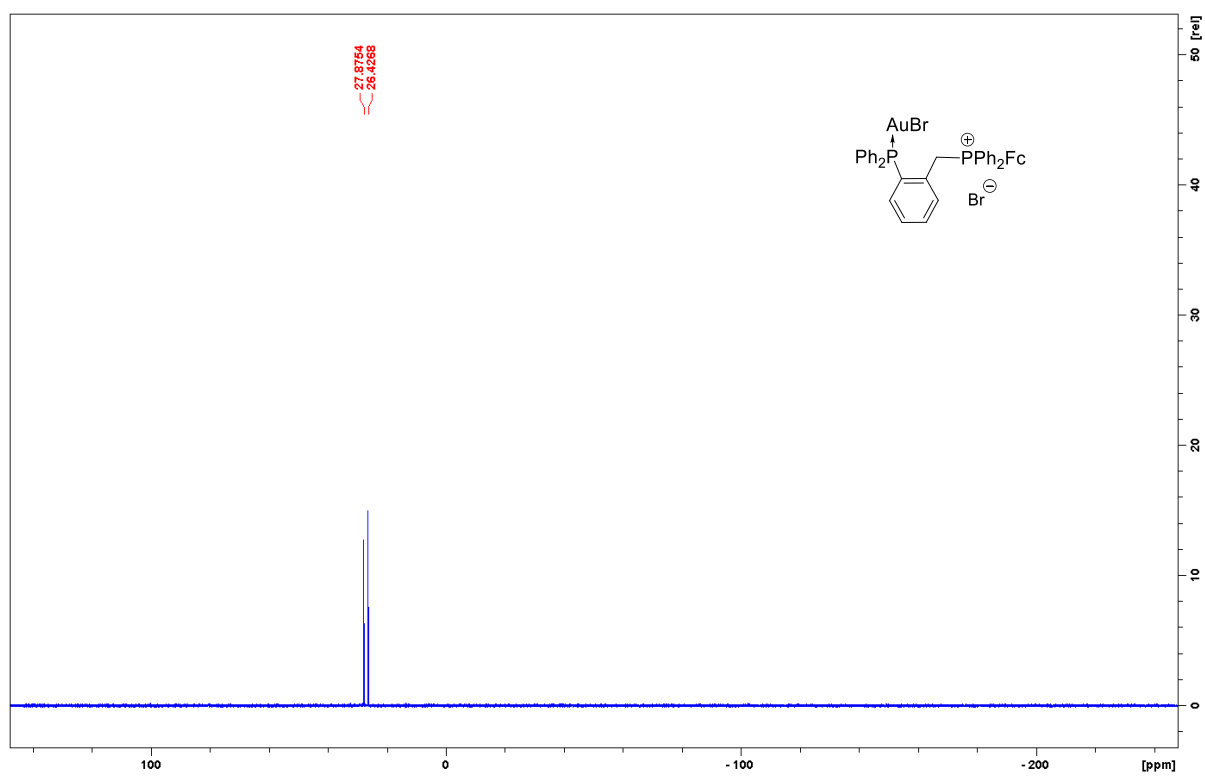

$^{31}\text{P}\{^1\text{H}\}$  NMR (243 MHz, Methylene Chloride- $d_2$ )

15.  $^1\text{H}$ ,  $^{13}\text{C}\{^1\text{H}\}$  and  $^{31}\text{P}\{^1\text{H}\}$  NMR spectra of compound **If**

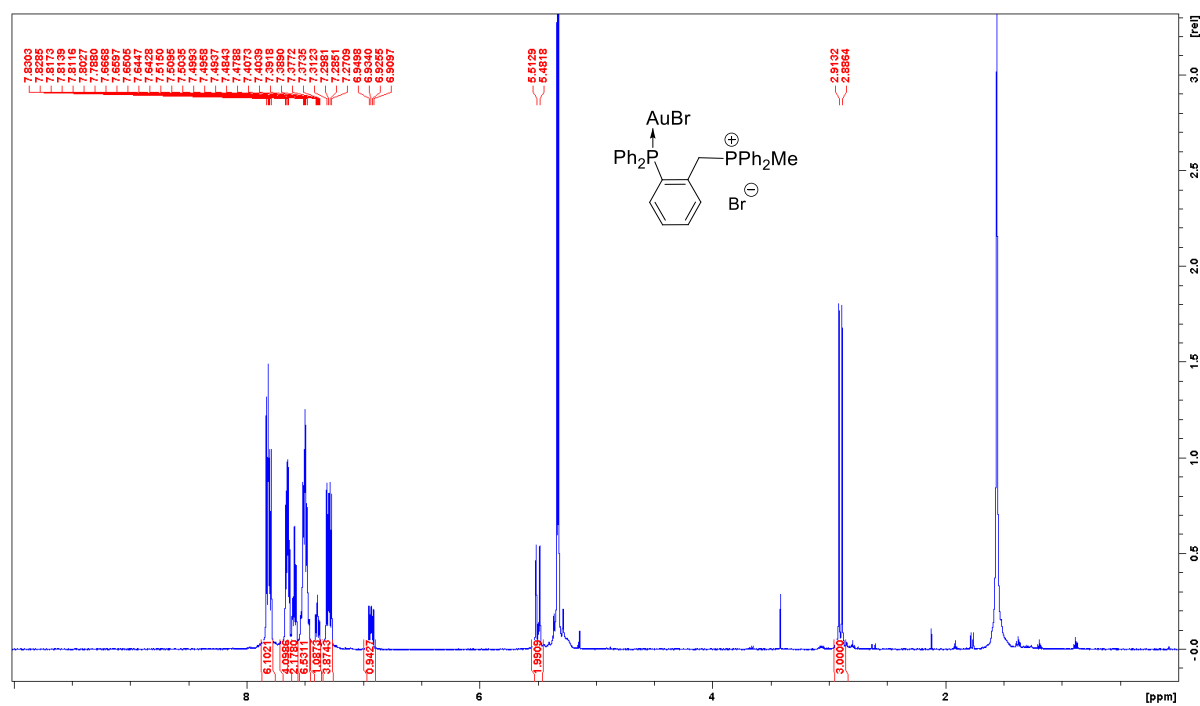

$^1\text{H}$  NMR (500 MHz, Methylene Chloride- $d_2$ )

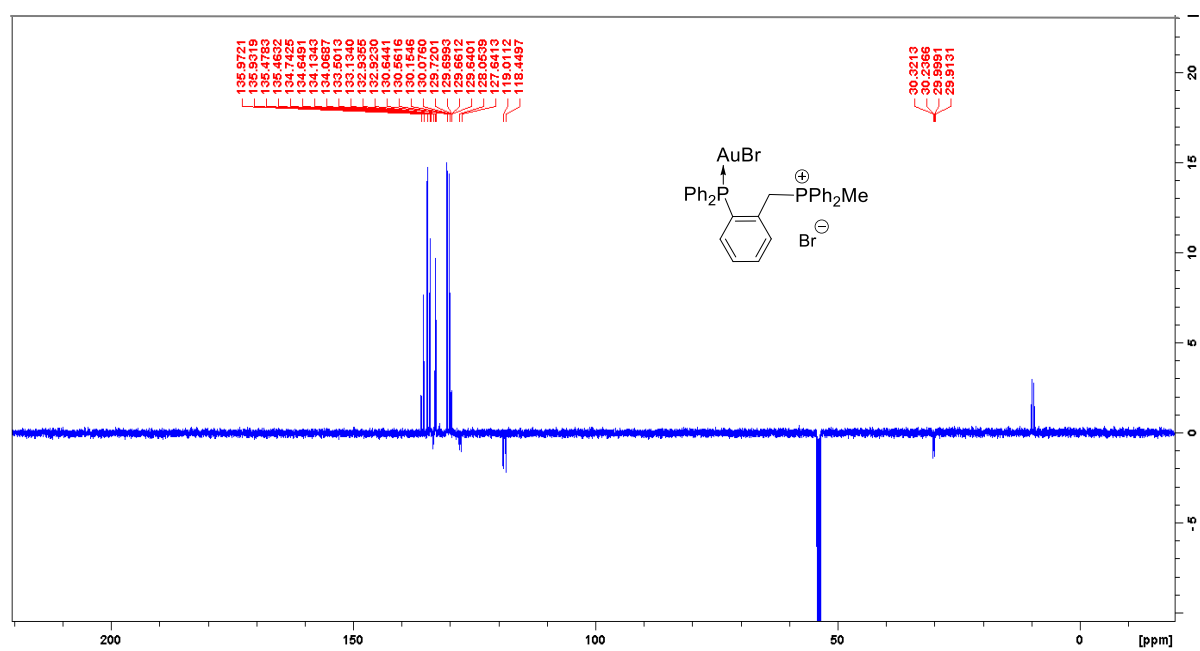

$^{13}\text{C}\{^1\text{H}\}$  J-mod NMR (151 MHz, Methylene Chloride- $d_2$ )

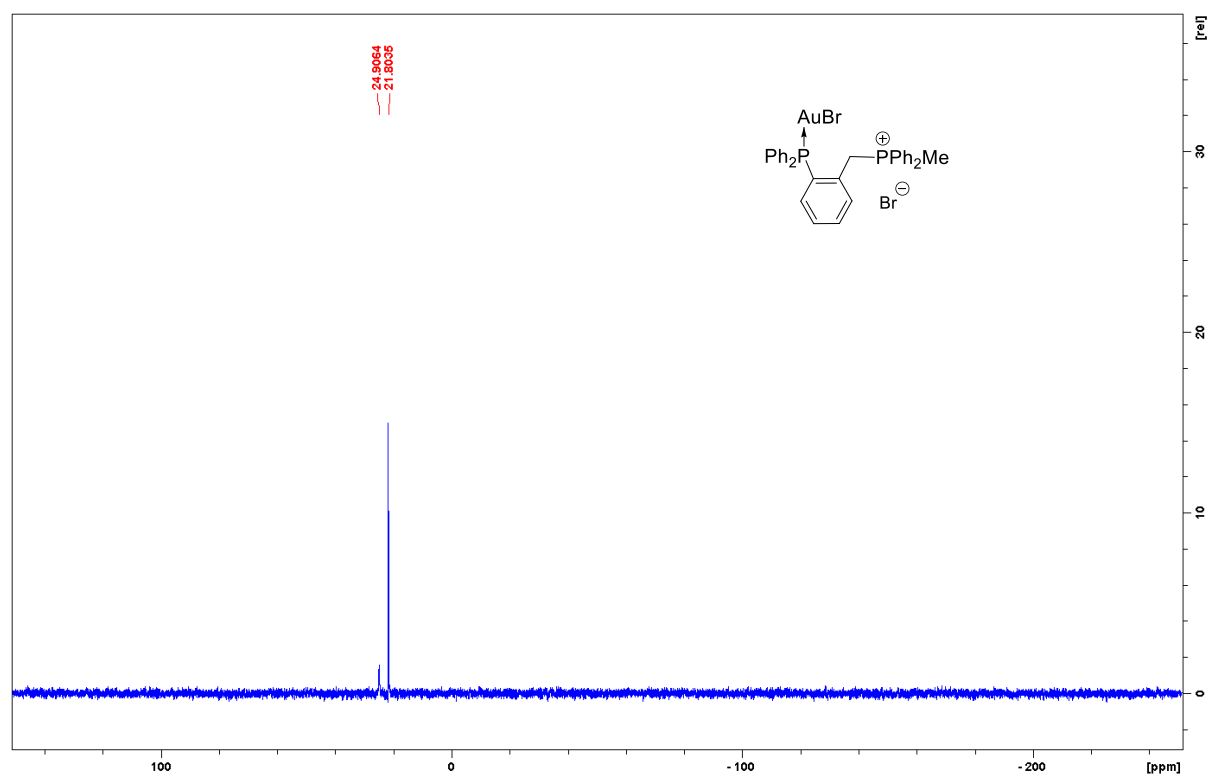

$^{31}\text{P}\{^1\text{H}\}$  NMR (202 MHz, Methylene Chloride- $d_2$ )

16.  $^1\text{H}$ ,  $^{13}\text{C}\{^1\text{H}\}$  and  $^{31}\text{P}\{^1\text{H}\}$  NMR spectra of compound **4**

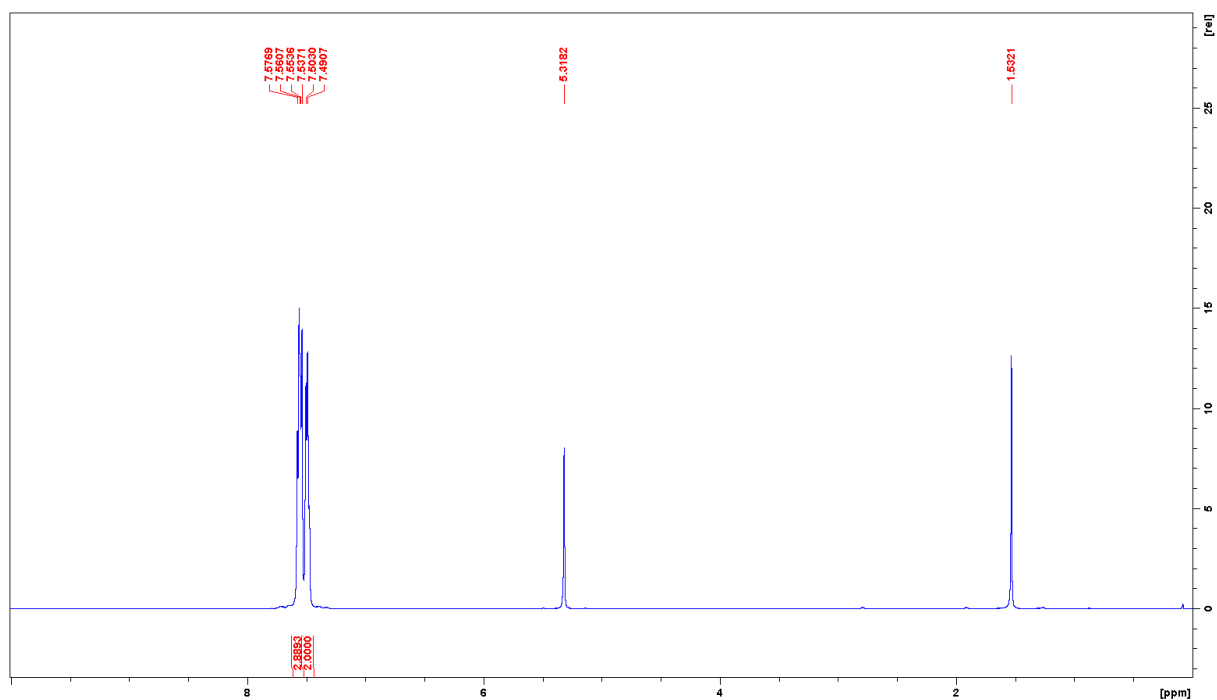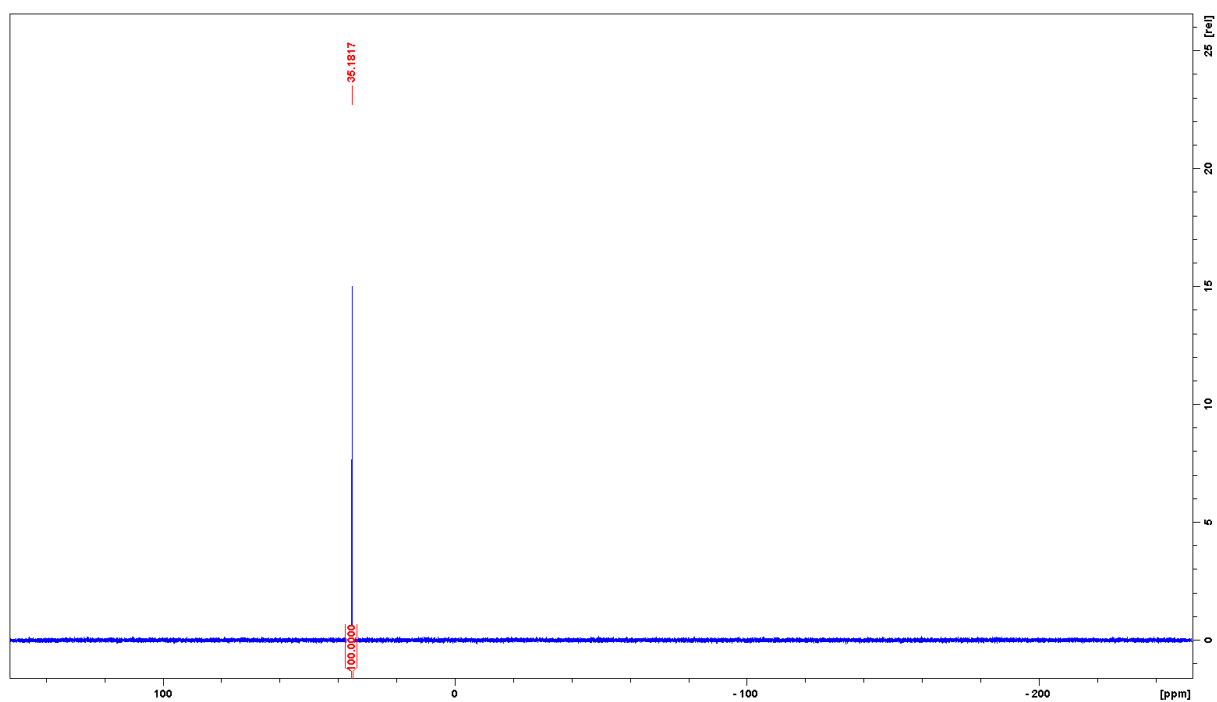

## 17. Crystal structure and table of crystal data of compound **1e**

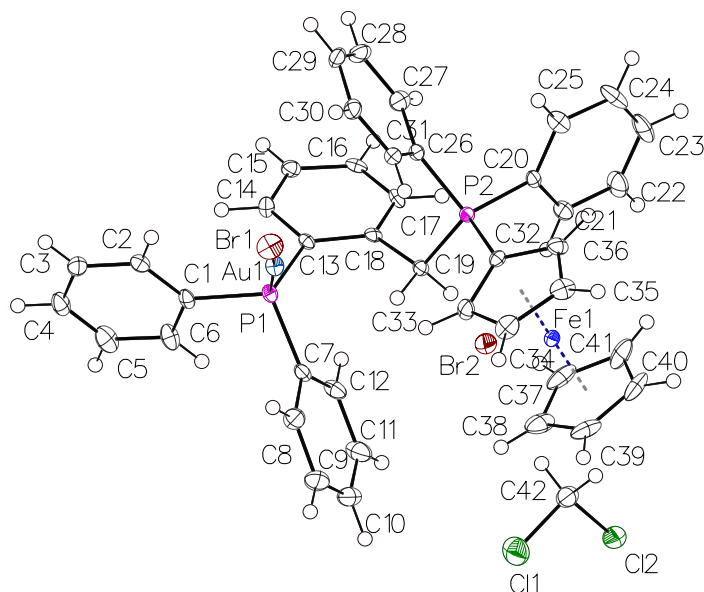

**Experimental.** Single clear light orange block-shaped crystals of compound **1e** were recrystallized from diethyl ether by slow evaporation. A suitable crystal 0.74x0.42x0.27 mm<sup>3</sup> was selected and mounted on a MITIGEN holder oil on a Bruker D8 VENTURE diffractometer. The crystal was kept at  $T = 100(1)$  K during data collection. Using **Olex2** (Dolomanov et al., 2009), the structure was solved with the **ShelXT** (Sheldrick, 2015) structure solution program, using the Intrinsic Phasing solution method. The model was refined with version 2018/1 of **ShelXL** (Sheldrick, 2015) using Least Squares minimization.

**Crystal Data.** C<sub>42</sub>H<sub>37</sub>AuBr<sub>2</sub>Cl<sub>2</sub>FeP<sub>2</sub>,  $M_r = 1087.19$ , orthorhombic, *Pbca* (No. 61),  $a = 18.7538(15)$  Å,  $b = 17.9377(14)$  Å,  $c = 23.5541(17)$  Å,  $\alpha = \beta = \gamma = 90^\circ$ ,  $V = 7923.6(11)$  Å<sup>3</sup>,  $T = 100(1)$  K,  $Z = 8$ ,  $Z' = 1$ ,  $\mu(\text{MoK}\alpha) = 6.328$ , 122695 reflections measured, 9105 unique ( $R_{\text{int}} = 0.0561$ ) which were used in all calculations. The final  $wR_2$  was 0.0609 (all data) and  $R_1$  was 0.0291 ( $I > 2\sigma(I)$ ).

| Compound                              | <b>1e</b>                                                                          |
|---------------------------------------|------------------------------------------------------------------------------------|
| <b>CCDC</b>                           | 2036897                                                                            |
| Internal reference                    | 20180104BR114                                                                      |
| Formula                               | C <sub>42</sub> H <sub>37</sub> AuBr <sub>2</sub> Cl <sub>2</sub> FeP <sub>2</sub> |
| $D_{\text{calc.}} / \text{g cm}^{-3}$ | 1.823                                                                              |
| $\mu / \text{mm}^{-1}$                | 6.328                                                                              |
| Formula Weight                        | 1087.19                                                                            |
| Colour                                | clear light orange                                                                 |
| Shape                                 | block                                                                              |
| Size/mm <sup>3</sup>                  | 0.74x0.42x0.27                                                                     |
| $T/\text{K}$                          | 100(1)                                                                             |
| Crystal System                        | orthorhombic                                                                       |
| Space Group                           | <i>Pbca</i>                                                                        |
| $a/\text{\AA}$                        | 18.7538(15)                                                                        |
| $b/\text{\AA}$                        | 17.9377(14)                                                                        |
| $c/\text{\AA}$                        | 23.5541(17)                                                                        |
| $\alpha/^\circ$                       | 90                                                                                 |
| $\beta/^\circ$                        | 90                                                                                 |
| $\gamma/^\circ$                       | 90                                                                                 |
| $V/\text{\AA}^3$                      | 7923.6(11)                                                                         |
| $Z$                                   | 8                                                                                  |
| $Z'$                                  | 1                                                                                  |
| Wavelength/Å                          | 0.710760                                                                           |
| Radiation type                        | MoK $\alpha$                                                                       |
| $\theta_{\text{min}}/^\circ$          | 3.000                                                                              |
| $\theta_{\text{max}}/^\circ$          | 27.547                                                                             |
| Measured Refl.                        | 122695                                                                             |
| Independent Refl.                     | 9105                                                                               |
| Reflections Used                      | 7686                                                                               |
| $R_{\text{int}}$                      | 0.0561                                                                             |
| Parameters                            | 451                                                                                |
| Restraints                            | 0                                                                                  |
| Largest Peak                          | 0.976                                                                              |
| Deepest Hole                          | -1.242                                                                             |
| GooF                                  | 1.066                                                                              |
| $wR_2$ (all data)                     | 0.0609                                                                             |
| $wR_2$                                | 0.0576                                                                             |
| $R_1$ (all data)                      | 0.0408                                                                             |
| $R_1$                                 | 0.0291                                                                             |

## Structure Quality Indicators

|              |                 |                  |                        |               |
|--------------|-----------------|------------------|------------------------|---------------|
| Reflections: | d min (Mo) 0.77 | I/ $\sigma$ 31.4 | R <sub>int</sub> 5.61% | complete 100% |
| Refinement:  | Shift -0.003    | Max Peak 1.0     | Min Peak -1.2          | Goof 1.066    |

A clear light orange block-shaped crystal with dimensions 0.74x0.42x0.27 mm<sup>3</sup> was mounted on a MITIGEN holder oil. X-ray diffraction data were collected using a Bruker D8 VENTURE diffractometer equipped with an Oxford Cryosystems low-temperature device, operating at  $T = 100(1)$  K. Data were measured using  $\phi$  and  $\omega$  scans using MoK $\alpha$  radiation (X-ray tube, 50 kV, 30 mA). The total number of runs and images was based on the strategy calculation from the program **APEX3** (Bruker, 2015). The maximum resolution achieved was  $\Theta = 27.547^\circ$ . Cell parameters were retrieved using the **SAINT** (Bruker, V8.38A, after 2013) software and refined using **SAINT** (Bruker, V8.38A, after 2013) on 8936 reflections, 7 % of the observed reflections. Data reduction was performed using the **SAINT** (Bruker, V8.38A, after 2013) software which corrects for Lorentz polarisation. The final completeness is 99.70 % out to  $27.547^\circ$  in  $\Theta$ . A multi-scan absorption correction was performed using **SADABS-2016/2** (Bruker, 2016) was used for absorption correction.  $wR_2(\text{int})$  was 0.1054 before and 0.0559 after correction. The Ratio of minimum to maximum transmission is 0.5910. The absorption coefficient  $\mu$  of this material is 6.328 mm<sup>-1</sup> at this wavelength ( $\lambda = 0.71073\text{\AA}$ ) and the minimum and maximum transmissions are 0.0721 and 0.1220. The structure was solved in the space group *Pbca* (# 61) by Intrinsic Phasing using the **ShelXT** (Sheldrick, 2015) structure solution program and refined by Least Squares using version 2018/1 of **ShelXL** (Sheldrick, 2015). All non-hydrogen atoms were refined anisotropically. Hydrogen atom positions were calculated geometrically and refined using the riding model. There is a single molecule in the asymmetric unit,

**Table 1:** Bond Lengths in Å for **Ie**.

| Atom | Atom | Length/Å  | Atom | Atom | Length/Å |
|------|------|-----------|------|------|----------|
| Au1  | Br1  | 2.4026(4) | P2   | C32  | 1.765(3) |
| Au1  | P1   | 2.2373(9) | P2   | C19  | 1.807(3) |
| Fe1  | C33  | 2.035(4)  | P2   | C26  | 1.789(3) |
| Fe1  | C32  | 2.022(3)  | P2   | C20  | 1.798(3) |
| Fe1  | C34  | 2.045(4)  | Cl2  | C42  | 1.764(4) |
| Fe1  | C35  | 2.048(4)  | Cl1  | C42  | 1.771(4) |
| Fe1  | C36  | 2.039(4)  | C33  | C32  | 1.442(5) |
| Fe1  | C41  | 2.043(4)  | C33  | C34  | 1.421(5) |
| Fe1  | C40  | 2.037(4)  | C13  | C18  | 1.405(5) |
| Fe1  | C37  | 2.050(4)  | C13  | C14  | 1.400(5) |
| Fe1  | C38  | 2.049(4)  | C18  | C17  | 1.394(5) |
| Fe1  | C39  | 2.038(4)  | C18  | C19  | 1.518(5) |
| P1   | C13  | 1.825(3)  | C32  | C36  | 1.436(5) |
| P1   | C1   | 1.818(3)  | C34  | C35  | 1.411(6) |
| P1   | C7   | 1.814(4)  | C2   | C1   | 1.392(5) |

| Atom | Atom | Length/Å |
|------|------|----------|
| C2   | C3   | 1.389(5) |
| C1   | C6   | 1.397(5) |
| C17  | C16  | 1.383(5) |
| C7   | C8   | 1.401(5) |
| C7   | C12  | 1.392(5) |
| C14  | C15  | 1.385(5) |
| C30  | C31  | 1.381(5) |
| C30  | C29  | 1.386(5) |
| C8   | C9   | 1.390(5) |
| C27  | C26  | 1.398(5) |
| C27  | C28  | 1.389(5) |
| C31  | C26  | 1.397(5) |
| C16  | C15  | 1.385(5) |
| C12  | C11  | 1.393(5) |
| C6   | C5   | 1.389(5) |
| C20  | C21  | 1.401(5) |

| Atom | Atom | Length/Å |
|------|------|----------|
| C20  | C25  | 1.390(5) |
| C29  | C28  | 1.383(6) |
| C35  | C36  | 1.416(5) |
| C4   | C5   | 1.379(6) |
| C4   | C3   | 1.376(6) |
| C21  | C22  | 1.383(5) |
| C9   | C10  | 1.383(6) |
| C41  | C40  | 1.410(6) |
| C41  | C37  | 1.421(6) |
| C40  | C39  | 1.407(6) |
| C10  | C11  | 1.383(6) |
| C37  | C38  | 1.401(6) |
| C38  | C39  | 1.425(6) |
| C22  | C23  | 1.379(6) |
| C23  | C24  | 1.384(6) |
| C25  | C24  | 1.395(6) |

**Table 2:** Bond Angles in ° for **Ie**.

| Atom | Atom | Atom | Angle/°    |
|------|------|------|------------|
| P1   | Au1  | Br1  | 172.73(2)  |
| C33  | Fe1  | C34  | 40.78(15)  |
| C33  | Fe1  | C35  | 68.75(16)  |
| C33  | Fe1  | C36  | 69.63(15)  |
| C33  | Fe1  | C41  | 157.13(16) |
| C33  | Fe1  | C40  | 161.30(16) |
| C33  | Fe1  | C37  | 122.12(16) |
| C33  | Fe1  | C38  | 108.69(17) |
| C33  | Fe1  | C39  | 125.03(17) |
| C32  | Fe1  | C33  | 41.63(13)  |
| C32  | Fe1  | C34  | 68.92(14)  |

| Atom | Atom | Atom | Angle/°    |
|------|------|------|------------|
| C32  | Fe1  | C35  | 68.86(14)  |
| C32  | Fe1  | C36  | 41.42(13)  |
| C32  | Fe1  | C41  | 122.41(16) |
| C32  | Fe1  | C40  | 153.81(17) |
| C32  | Fe1  | C37  | 112.76(14) |
| C32  | Fe1  | C38  | 130.68(15) |
| C32  | Fe1  | C39  | 165.77(17) |
| C34  | Fe1  | C35  | 40.32(16)  |
| C34  | Fe1  | C37  | 153.41(18) |
| C34  | Fe1  | C38  | 117.46(18) |
| C35  | Fe1  | C37  | 166.27(18) |

| Atom | Atom | Atom | Angle/°    |
|------|------|------|------------|
| C35  | Fe1  | C38  | 149.30(17) |
| C36  | Fe1  | C34  | 68.44(16)  |
| C36  | Fe1  | C35  | 40.55(15)  |
| C36  | Fe1  | C41  | 109.43(18) |
| C36  | Fe1  | C37  | 131.59(17) |
| C36  | Fe1  | C38  | 169.59(16) |
| C41  | Fe1  | C34  | 161.64(16) |
| C41  | Fe1  | C35  | 126.28(17) |
| C41  | Fe1  | C37  | 40.64(17)  |
| C41  | Fe1  | C38  | 67.88(19)  |
| C40  | Fe1  | C34  | 122.98(16) |
| C40  | Fe1  | C35  | 104.27(16) |
| C40  | Fe1  | C36  | 117.05(17) |
| C40  | Fe1  | C41  | 40.43(16)  |
| C40  | Fe1  | C37  | 67.99(16)  |
| C40  | Fe1  | C38  | 67.95(18)  |
| C40  | Fe1  | C39  | 40.40(18)  |
| C38  | Fe1  | C37  | 39.97(18)  |
| C39  | Fe1  | C34  | 103.71(17) |
| C39  | Fe1  | C35  | 113.94(16) |
| C39  | Fe1  | C36  | 148.71(16) |
| C39  | Fe1  | C41  | 68.18(19)  |
| C39  | Fe1  | C37  | 68.10(17)  |
| C39  | Fe1  | C38  | 40.80(16)  |
| C13  | P1   | Au1  | 119.10(11) |
| C1   | P1   | Au1  | 109.81(12) |
| C1   | P1   | C13  | 104.03(15) |
| C7   | P1   | Au1  | 111.42(12) |
| C7   | P1   | C13  | 106.39(15) |

| Atom | Atom | Atom | Angle/°    |
|------|------|------|------------|
| C7   | P1   | C1   | 105.00(16) |
| C32  | P2   | C19  | 108.26(16) |
| C32  | P2   | C26  | 108.83(16) |
| C32  | P2   | C20  | 107.98(16) |
| C26  | P2   | C19  | 109.75(15) |
| C26  | P2   | C20  | 108.70(16) |
| C20  | P2   | C19  | 113.23(16) |
| C32  | C33  | Fe1  | 68.73(19)  |
| C34  | C33  | Fe1  | 70.0(2)    |
| C34  | C33  | C32  | 107.0(3)   |
| C18  | C13  | P1   | 123.3(3)   |
| C14  | C13  | P1   | 118.0(2)   |
| C14  | C13  | C18  | 118.7(3)   |
| C13  | C18  | C19  | 122.6(3)   |
| C17  | C18  | C13  | 119.1(3)   |
| C17  | C18  | C19  | 118.3(3)   |
| P2   | C32  | Fe1  | 129.01(18) |
| C33  | C32  | Fe1  | 69.64(19)  |
| C33  | C32  | P2   | 127.4(3)   |
| C36  | C32  | Fe1  | 69.90(19)  |
| C36  | C32  | P2   | 124.6(3)   |
| C36  | C32  | C33  | 107.8(3)   |
| C33  | C34  | Fe1  | 69.2(2)    |
| C35  | C34  | Fe1  | 70.0(2)    |
| C35  | C34  | C33  | 109.0(3)   |
| C3   | C2   | C1   | 119.4(3)   |
| C2   | C1   | P1   | 119.9(3)   |
| C2   | C1   | C6   | 119.8(3)   |
| C6   | C1   | P1   | 120.3(3)   |

| Atom | Atom | Atom | Angle/°   |
|------|------|------|-----------|
| C16  | C17  | C18  | 121.3(3)  |
| C8   | C7   | P1   | 118.4(3)  |
| C12  | C7   | P1   | 122.9(3)  |
| C12  | C7   | C8   | 118.7(3)  |
| C15  | C14  | C13  | 121.3(3)  |
| C18  | C19  | P2   | 114.7(2)  |
| C31  | C30  | C29  | 119.9(4)  |
| C9   | C8   | C7   | 121.2(4)  |
| C28  | C27  | C26  | 119.5(4)  |
| C30  | C31  | C26  | 119.8(3)  |
| C17  | C16  | C15  | 119.8(3)  |
| C27  | C26  | P2   | 120.4(3)  |
| C31  | C26  | P2   | 119.5(3)  |
| C31  | C26  | C27  | 120.1(3)  |
| C7   | C12  | C11  | 120.0(4)  |
| C5   | C6   | C1   | 120.1(4)  |
| C21  | C20  | P2   | 120.9(3)  |
| C25  | C20  | P2   | 118.7(3)  |
| C25  | C20  | C21  | 120.2(3)  |
| C28  | C29  | C30  | 120.7(3)  |
| C34  | C35  | Fe1  | 69.7(2)   |
| C34  | C35  | C36  | 108.6(3)  |
| C36  | C35  | Fe1  | 69.4(2)   |
| C3   | C4   | C5   | 120.7(4)  |
| C29  | C28  | C27  | 120.0(4)  |
| C32  | C36  | Fe1  | 68.67(19) |
| C35  | C36  | Fe1  | 70.1(2)   |
| C35  | C36  | C32  | 107.6(3)  |

| Atom | Atom | Atom | Angle/°  |
|------|------|------|----------|
| C4   | C5   | C6   | 119.6(4) |
| C22  | C21  | C20  | 119.3(4) |
| C14  | C15  | C16  | 119.6(3) |
| C4   | C3   | C2   | 120.5(4) |
| C10  | C9   | C8   | 119.3(4) |
| C40  | C41  | Fe1  | 69.6(2)  |
| C40  | C41  | C37  | 107.6(4) |
| C37  | C41  | Fe1  | 69.9(2)  |
| C41  | C40  | Fe1  | 70.0(2)  |
| C39  | C40  | Fe1  | 69.8(2)  |
| C39  | C40  | C41  | 108.6(4) |
| C9   | C10  | C11  | 120.2(4) |
| C41  | C37  | Fe1  | 69.4(2)  |
| C38  | C37  | Fe1  | 70.0(2)  |
| C38  | C37  | C41  | 108.1(4) |
| C37  | C38  | Fe1  | 70.0(2)  |
| C37  | C38  | C39  | 108.2(4) |
| C39  | C38  | Fe1  | 69.2(2)  |
| Cl2  | C42  | Cl1  | 110.3(2) |
| C10  | C11  | C12  | 120.6(4) |
| C23  | C22  | C21  | 120.5(4) |
| C22  | C23  | C24  | 120.7(4) |
| C40  | C39  | Fe1  | 69.8(2)  |
| C40  | C39  | C38  | 107.5(4) |
| C38  | C39  | Fe1  | 70.0(2)  |
| C20  | C25  | C24  | 119.8(4) |
| C23  | C24  | C25  | 119.6(4) |

**Table 3:** Torsion Angles in ° for **Ie**.

| Atom | Atom | Atom | Atom | Angle/°   |
|------|------|------|------|-----------|
| Au1  | P1   | C13  | C18  | 71.4(3)   |
| Au1  | P1   | C13  | C14  | -109.1(2) |
| Au1  | P1   | C1   | C2   | 26.2(3)   |
| Au1  | P1   | C1   | C6   | -155.9(3) |
| Au1  | P1   | C7   | C8   | 34.0(3)   |
| Au1  | P1   | C7   | C12  | -146.4(3) |
| Fe1  | C33  | C32  | P2   | 124.2(3)  |
| Fe1  | C33  | C32  | C36  | -59.7(2)  |
| Fe1  | C33  | C34  | C35  | 58.8(3)   |
| Fe1  | C32  | C36  | C35  | -59.5(2)  |
| Fe1  | C34  | C35  | C36  | 58.6(3)   |
| Fe1  | C35  | C36  | C32  | 58.6(2)   |
| Fe1  | C41  | C40  | C39  | 59.4(3)   |
| Fe1  | C41  | C37  | C38  | -59.5(3)  |
| Fe1  | C40  | C39  | C38  | 60.1(3)   |
| Fe1  | C37  | C38  | C39  | -58.8(3)  |
| Fe1  | C38  | C39  | C40  | -60.0(3)  |
| P1   | C13  | C18  | C17  | 174.7(2)  |
| P1   | C13  | C18  | C19  | -3.5(4)   |
| P1   | C13  | C14  | C15  | -177.2(3) |
| P1   | C1   | C6   | C5   | -177.8(3) |
| P1   | C7   | C8   | C9   | 178.5(3)  |
| P1   | C7   | C12  | C11  | -179.7(3) |
| P2   | C32  | C36  | Fe1  | -124.2(3) |
| P2   | C32  | C36  | C35  | 176.3(3)  |
| P2   | C20  | C21  | C22  | -174.8(3) |
| P2   | C20  | C25  | C24  | 173.8(3)  |
| C33  | C32  | C36  | Fe1  | 59.6(2)   |
| C33  | C32  | C36  | C35  | 0.0(4)    |

| Atom | Atom | Atom | Atom | Angle/°   |
|------|------|------|------|-----------|
| C33  | C34  | C35  | Fe1  | -58.4(3)  |
| C33  | C34  | C35  | C36  | 0.2(4)    |
| C13  | P1   | C1   | C2   | -102.3(3) |
| C13  | P1   | C1   | C6   | 75.5(3)   |
| C13  | P1   | C7   | C8   | 165.3(3)  |
| C13  | P1   | C7   | C12  | -15.1(3)  |
| C13  | C18  | C17  | C16  | 3.6(5)    |
| C13  | C18  | C19  | P2   | -113.3(3) |
| C13  | C14  | C15  | C16  | 1.5(5)    |
| C18  | C13  | C14  | C15  | 2.4(5)    |
| C18  | C17  | C16  | C15  | 0.3(5)    |
| C32  | P2   | C19  | C18  | 159.7(2)  |
| C32  | P2   | C26  | C27  | 163.5(3)  |
| C32  | P2   | C26  | C31  | -18.1(3)  |
| C32  | P2   | C20  | C21  | 91.6(3)   |
| C32  | P2   | C20  | C25  | -82.7(3)  |
| C32  | C33  | C34  | Fe1  | -59.0(2)  |
| C32  | C33  | C34  | C35  | -0.2(4)   |
| C34  | C33  | C32  | Fe1  | 59.8(2)   |
| C34  | C33  | C32  | P2   | -176.0(3) |
| C34  | C33  | C32  | C36  | 0.1(4)    |
| C34  | C35  | C36  | Fe1  | -58.8(3)  |
| C34  | C35  | C36  | C32  | -0.2(4)   |
| C2   | C1   | C6   | C5   | 0.1(6)    |
| C1   | P1   | C13  | C18  | -166.0(3) |
| C1   | P1   | C13  | C14  | 13.5(3)   |
| C1   | P1   | C7   | C8   | -84.8(3)  |
| C1   | P1   | C7   | C12  | 94.8(3)   |
| C1   | C2   | C3   | C4   | 0.0(5)    |

| Atom | Atom | Atom | Atom | Angle/°   |
|------|------|------|------|-----------|
| C1   | C6   | C5   | C4   | -0.3(6)   |
| C17  | C18  | C19  | P2   | 68.5(3)   |
| C17  | C16  | C15  | C14  | -2.8(5)   |
| C7   | P1   | C13  | C18  | -55.5(3)  |
| C7   | P1   | C13  | C14  | 124.1(3)  |
| C7   | P1   | C1   | C2   | 146.1(3)  |
| C7   | P1   | C1   | C6   | -36.1(3)  |
| C7   | C8   | C9   | C10  | 1.3(6)    |
| C7   | C12  | C11  | C10  | 1.2(6)    |
| C14  | C13  | C18  | C17  | -4.9(5)   |
| C14  | C13  | C18  | C19  | 176.9(3)  |
| C19  | P2   | C32  | Fe1  | 56.2(3)   |
| C19  | P2   | C32  | C33  | -37.0(3)  |
| C19  | P2   | C32  | C36  | 147.5(3)  |
| C19  | P2   | C26  | C27  | -78.2(3)  |
| C19  | P2   | C26  | C31  | 100.2(3)  |
| C19  | P2   | C20  | C21  | -28.3(3)  |
| C19  | P2   | C20  | C25  | 157.5(3)  |
| C19  | C18  | C17  | C16  | -178.1(3) |
| C30  | C31  | C26  | P2   | -178.3(3) |
| C30  | C31  | C26  | C27  | 0.1(5)    |
| C30  | C29  | C28  | C27  | -1.3(6)   |
| C8   | C7   | C12  | C11  | -0.1(5)   |
| C8   | C9   | C10  | C11  | -0.2(7)   |
| C31  | C30  | C29  | C28  | 2.1(6)    |
| C26  | P2   | C32  | Fe1  | 175.5(2)  |
| C26  | P2   | C32  | C33  | 82.3(3)   |
| C26  | P2   | C32  | C36  | -93.3(3)  |
| C26  | P2   | C19  | C18  | 41.0(3)   |

| Atom | Atom | Atom | Atom | Angle/°   |
|------|------|------|------|-----------|
| C26  | P2   | C20  | C21  | -150.5(3) |
| C26  | P2   | C20  | C25  | 35.3(3)   |
| C26  | C27  | C28  | C29  | -0.2(6)   |
| C12  | C7   | C8   | C9   | -1.1(6)   |
| C20  | P2   | C32  | Fe1  | -66.7(3)  |
| C20  | P2   | C32  | C33  | -159.9(3) |
| C20  | P2   | C32  | C36  | 24.6(3)   |
| C20  | P2   | C19  | C18  | -80.6(3)  |
| C20  | P2   | C26  | C27  | 46.2(3)   |
| C20  | P2   | C26  | C31  | -135.5(3) |
| C20  | C21  | C22  | C23  | 1.5(6)    |
| C20  | C25  | C24  | C23  | 0.7(6)    |
| C29  | C30  | C31  | C26  | -1.5(5)   |
| C28  | C27  | C26  | P2   | 179.2(3)  |
| C28  | C27  | C26  | C31  | 0.8(5)    |
| C5   | C4   | C3   | C2   | -0.2(6)   |
| C21  | C20  | C25  | C24  | -0.4(6)   |
| C21  | C22  | C23  | C24  | -1.2(7)   |
| C3   | C2   | C1   | P1   | 177.9(3)  |
| C3   | C2   | C1   | C6   | 0.0(5)    |
| C3   | C4   | C5   | C6   | 0.3(6)    |
| C9   | C10  | C11  | C12  | -1.0(7)   |
| C41  | C40  | C39  | Fe1  | -59.5(3)  |
| C41  | C40  | C39  | C38  | 0.6(5)    |
| C41  | C37  | C38  | Fe1  | 59.2(3)   |
| C41  | C37  | C38  | C39  | 0.4(4)    |
| C40  | C41  | C37  | Fe1  | 59.6(3)   |
| C40  | C41  | C37  | C38  | 0.0(4)    |
| C37  | C41  | C40  | Fe1  | -59.8(3)  |

| Atom | Atom | Atom | Atom | Angle/° |
|------|------|------|------|---------|
| C37  | C41  | C40  | C39  | -0.4(4) |
| C37  | C38  | C39  | Fe1  | 59.4(3) |
| C37  | C38  | C39  | C40  | -0.6(5) |
| C22  | C23  | C24  | C25  | 0.2(7)  |
| C25  | C20  | C21  | C22  | -0.6(5) |

## 18. Crystal structure and table of crystal data of compound If

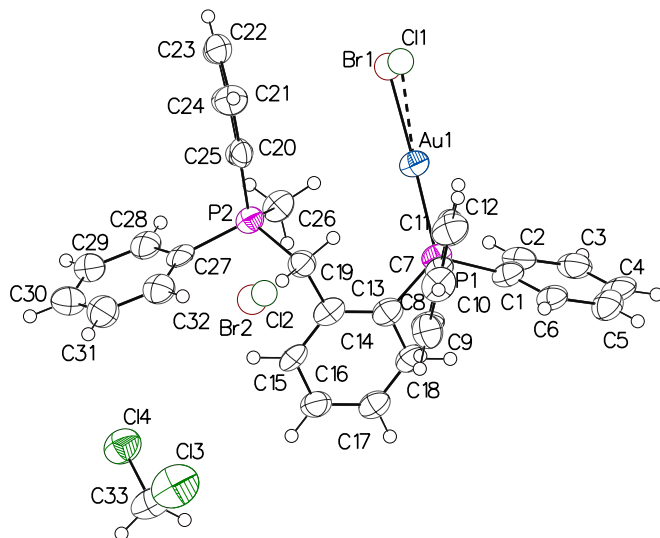

**Experimental.** Single clear light colourless prism-shaped crystals of compound **If** were recrystallised from DCM by slow evaporation. A suitable crystal 0.11x0.11x0.07 mm<sup>3</sup> was selected and mounted on a MITIGEN holder oil on a Nonius Kappa Apex II diffractometer. The crystal was kept at  $T = 110.0(1)$  K during data collection. Using **Olex2** (Dolomanov et al., 2009), the structure was solved with the **ShelXT** (Sheldrick, 2015) structure solution program, using the Intrinsic Phasing solution method. The model was refined with version 2018/3 of **ShelXL** (Sheldrick, 2015) using Least Squares minimisation.

**Crystal Data.**  $C_{33}H_{29}AuBr_{0.83}Cl_{3.17}P_2$ ,  $M_r = 863.06$ , orthorhombic,  $Pna2_1$  (No. 33),  $a = 25.312(2)$  Å,  $b = 9.6184(7)$  Å,  $c = 13.5131(9)$  Å,  $\alpha = \beta = \gamma = 90^\circ$ ,  $V = 3289.9(4)$  Å<sup>3</sup>,  $T = 110(1)$  K,  $Z = 4$ ,  $Z' = 1$ ,  $\mu(MoK\alpha) = 5.854$ , 17639 reflections measured, 5751 unique ( $R_{int} = 0.1236$ ) which were used in all calculations. The final  $wR_2$  was 0.1461 (all data) and  $R_1$  was 0.0644 ( $I > 2\sigma(I)$ ).

| Compound               | If                                    |
|------------------------|---------------------------------------|
| CCDC                   | 2036898                               |
| Internal reference     | 17br88                                |
| Formula                | $C_{33}H_{29}AuBr_{0.83}Cl_{3.17}P_2$ |
| $D_{calc.}/g\ cm^{-3}$ | 1.742                                 |
| $\mu/mm^{-1}$          | 5.854                                 |
| Formula Weight         | 863.06                                |
| Colour                 | clear light colourless                |
| Shape                  | prism                                 |
| Size/mm <sup>3</sup>   | 0.11x0.11x0.07                        |
| $T/K$                  | 110.0(1)                              |
| Crystal System         | orthorhombic                          |
| Flack Parameter        | 0.055(14)                             |
| Hooft Parameter        | 0.041(14)                             |
| Space Group            | $Pna2_1$                              |
| $a/\text{\AA}$         | 25.312(2)                             |
| $b/\text{\AA}$         | 9.6184(7)                             |
| $c/\text{\AA}$         | 13.5131(9)                            |
| $\alpha/^\circ$        | 90                                    |
| $\beta/^\circ$         | 90                                    |
| $\gamma/^\circ$        | 90                                    |
| $V/\text{\AA}^3$       | 3289.9(4)                             |
| $Z$                    | 4                                     |
| $Z'$                   | 1                                     |
| Wavelength/Å           | 0.710730                              |
| Radiation type         | MoK $\alpha$                          |
| $\theta_{min}/^\circ$  | 2.660                                 |
| $\theta_{max}/^\circ$  | 25.000                                |
| Measured Refl.         | 17639                                 |
| Independent Refl.      | 5751                                  |
| Reflections Used       | 3381                                  |
| $R_{int}$              | 0.1236                                |
| Parameters             | 312                                   |
| Restraints             | 268                                   |
| Largest Peak           | 1.416                                 |
| Deepest Hole           | -1.097                                |
| GooF                   | 0.986                                 |
| $wR_2$ (all data)      | 0.1461                                |
| $wR_2$                 | 0.1227                                |
| $R_1$ (all data)       | 0.1258                                |
| $R_1$                  | 0.0644                                |

## Structure Quality Indicators

|                     |                                 |        |                 |     |                  |        |            |       |       |           |
|---------------------|---------------------------------|--------|-----------------|-----|------------------|--------|------------|-------|-------|-----------|
| <b>Reflections:</b> | d min (Mo)<br>2 $\theta$ =50.0° | 0.84   | I/ $\sigma$ (I) | 7.4 | R <sub>int</sub> | 12.36% | Full 50.0° | 99.7  |       |           |
| <b>Refinement:</b>  | Shift                           | -0.001 | Max Peak        | 1.4 | Min Peak         | -1.1   | Goof       | 0.986 | Flack | 0.055(14) |

A clear light colourless prism-shaped crystal with dimensions 0.11x0.11x0.07 mm<sup>3</sup> was mounted on a MITIGEN holder oil. X-ray diffraction data were collected using a Nonius Kappa Apex II diffractometer equipped with an Oxford Cryosystems low-temperature device, operating at  $T = 110.0(1)$  K. Data were measured using  $\phi$  and  $\omega$  scans using MoK $\alpha$  radiation (X-ray tube, 50 kV, 32 mA). The total number of runs and images was based on the strategy calculation from the program **APEX3** (Bruker, 2015). The maximum resolution achieved was  $\Theta = 25^\circ$ . Cell parameters were retrieved using the **SAINT** (Bruker, V8.38A, after 2013) software and refined using **SAINT** (Bruker, V8.38A, after 2013) on 917 reflections, 5 % of the observed reflections. Data reduction was performed using the **SAINT** (Bruker, V8.38A, after 2013) software which corrects for Lorentz polarisation. The final completeness is 99.70 % out to  $25^\circ$  in  $\Theta$ . A multi-scan absorption correction was performed using **SADABS-2016/2** (Bruker, 2016/2) was used for absorption correction.  $wR_2(\text{int})$  was 0.1002 before and 0.0807 after correction. The Ratio of minimum to maximum transmission is 0.4338. The absorption coefficient  $\mu$  of this material is 5.854 mm<sup>-1</sup> at this wavelength ( $\lambda = 0.71073\text{\AA}$ ) and the minimum and maximum transmissions are 0.005 and 0.021. The structure was solved in the space group  $Pna2_1$  (# 33) by Intrinsic Phasing using the **ShelXT** (Sheldrick, 2015) structure solution program and refined by Least Squares using version 2016/6 of **ShelXL** (Sheldrick, 2015). Counterions were found disordered as a mixture of Bromine/Chlorine with a s.o.f of 53.4%/46.6% and 29.4%/70.6% for Br1/Cl1 and Br2/Cl2 respectively. All non-hydrogen atoms were refined anisotropically, excepted disordered Br/Cl. Hydrogen atom positions were calculated geometrically and refined using the riding model. Some rigid bond restraints with esds 0.002 for 1,2-distances and 0.002 for 1,3 were employed by using RIGU (Sheldrick, 2015) restraints to maintain a reasonable model. Poor diffraction was observed beyond  $2\theta = 50^\circ$ , these reflections were ignored totally from the refinement by using OMIT -2 50. High  $R_{\text{int}}$  value was observed because crystals weakly diffracting and exhibits many weak reflections at higher theta values.

**Table 4:** Bond Lengths in Å for If.

| Atom | Atom | Length/Å  | Atom | Atom | Length/Å |
|------|------|-----------|------|------|----------|
| Au1  | Br1  | 2.371(5)  | C20  | C25  | 1.42(4)  |
| Au1  | P1   | 2.250(5)  | C19  | C14  | 1.47(2)  |
| Au1  | Cl1  | 2.390(15) | C21  | C22  | 1.37(3)  |
| P1   | C13  | 1.798(14) | C14  | C15  | 1.3900   |
| P1   | C1   | 1.834(15) | C14  | C13  | 1.3900   |
| P1   | C7   | 1.806(16) | C15  | C16  | 1.3900   |
| P2   | C20  | 1.78(2)   | C16  | C17  | 1.3900   |
| P2   | C26  | 1.78(2)   | C17  | C18  | 1.3900   |
| P2   | C19  | 1.81(3)   | C18  | C13  | 1.3900   |
| P2   | C27  | 1.796(15) | C22  | C23  | 1.28(4)  |
| C20  | C21  | 1.42(3)   | C23  | C24  | 1.41(3)  |

| Atom | Atom | Length/Å |
|------|------|----------|
| C27  | C32  | 1.3900   |
| C27  | C28  | 1.3900   |
| C32  | C31  | 1.3900   |
| C31  | C30  | 1.3900   |
| C30  | C29  | 1.3900   |
| C29  | C28  | 1.3900   |
| C1   | C6   | 1.3900   |
| C1   | C2   | 1.3900   |
| C6   | C5   | 1.3900   |
| C5   | C4   | 1.3900   |
| C4   | C3   | 1.3900   |

| Atom | Atom | Length/Å |
|------|------|----------|
| C3   | C2   | 1.3900   |
| Cl4  | C33  | 1.74(3)  |
| Cl3  | C33  | 1.69(3)  |
| C24  | C25  | 1.37(3)  |
| C7   | C12  | 1.3900   |
| C7   | C8   | 1.3900   |
| C12  | C11  | 1.3900   |
| C11  | C10  | 1.3900   |
| C10  | C9   | 1.3900   |
| C9   | C8   | 1.3900   |

**Table 5:** Bond Angles in ° for If.

| Atom | Atom | Atom | Angle/°   |
|------|------|------|-----------|
| P1   | Au1  | Br1  | 178.3(3)  |
| P1   | Au1  | Cl1  | 171.8(5)  |
| C13  | P1   | Au1  | 117.0(6)  |
| C13  | P1   | C1   | 106.0(9)  |
| C13  | P1   | C7   | 103.7(9)  |
| C1   | P1   | Au1  | 109.1(7)  |
| C7   | P1   | Au1  | 111.8(7)  |
| C7   | P1   | C1   | 108.9(9)  |
| C20  | P2   | C26  | 109.9(12) |
| C20  | P2   | C19  | 108.9(13) |
| C20  | P2   | C27  | 107.8(10) |
| C26  | P2   | C19  | 108.3(12) |
| C26  | P2   | C27  | 110.3(11) |
| C27  | P2   | C19  | 111.6(11) |
| C21  | C20  | P2   | 121.7(19) |
| C25  | C20  | P2   | 119.4(19) |

| Atom | Atom | Atom | Angle/°   |
|------|------|------|-----------|
| C25  | C20  | C21  | 119(2)    |
| C14  | C19  | P2   | 116.0(16) |
| C22  | C21  | C20  | 119(2)    |
| C15  | C14  | C19  | 116.8(15) |
| C15  | C14  | C13  | 120.0     |
| C13  | C14  | C19  | 123.2(15) |
| C14  | C15  | C16  | 120.0     |
| C17  | C16  | C15  | 120.0     |
| C16  | C17  | C18  | 120.0     |
| C13  | C18  | C17  | 120.0     |
| C14  | C13  | P1   | 121.1(10) |
| C18  | C13  | P1   | 118.6(10) |
| C18  | C13  | C14  | 120.0     |
| C23  | C22  | C21  | 123(2)    |
| C22  | C23  | C24  | 119(3)    |
| C32  | C27  | P2   | 120.9(10) |

| Atom | Atom | Atom | Angle/°   | Atom | Atom | Atom | Angle/°   |
|------|------|------|-----------|------|------|------|-----------|
| C32  | C27  | C28  | 120.0     | C4   | C3   | C2   | 120.0     |
| C28  | C27  | P2   | 118.8(10) | C3   | C2   | C1   | 120.0     |
| C31  | C32  | C27  | 120.0     | C25  | C24  | C23  | 123(2)    |
| C32  | C31  | C30  | 120.0     | C12  | C7   | P1   | 118.7(9)  |
| C31  | C30  | C29  | 120.0     | C12  | C7   | C8   | 120.0     |
| C28  | C29  | C30  | 120.0     | C8   | C7   | P1   | 121.2(9)  |
| C29  | C28  | C27  | 120.0     | C11  | C12  | C7   | 120.0     |
| C6   | C1   | P1   | 121.0(10) | C12  | C11  | C10  | 120.0     |
| C6   | C1   | C2   | 120.0     | C11  | C10  | C9   | 120.0     |
| C2   | C1   | P1   | 118.7(10) | C10  | C9   | C8   | 120.0     |
| C5   | C6   | C1   | 120.0     | C9   | C8   | C7   | 120.0     |
| C6   | C5   | C4   | 120.0     | C24  | C25  | C20  | 117(2)    |
| C3   | C4   | C5   | 120.0     | Cl3  | C33  | Cl4  | 117.2(18) |

**Table 6:** Torsion Angles in ° for If.

| Atom | Atom | Atom | Atom | Angle/°    |
|------|------|------|------|------------|
| Au1  | P1   | C13  | C14  | -57.9(11)  |
| Au1  | P1   | C13  | C18  | 128.3(7)   |
| Au1  | P1   | C1   | C6   | 127.0(9)   |
| Au1  | P1   | C1   | C2   | -46.7(11)  |
| Au1  | P1   | C7   | C12  | -24.5(12)  |
| Au1  | P1   | C7   | C8   | 152.5(8)   |
| P1   | C1   | C6   | C5   | -173.6(13) |
| P1   | C1   | C2   | C3   | 173.8(13)  |
| P1   | C7   | C12  | C11  | 177.1(13)  |
| P1   | C7   | C8   | C9   | -177.0(14) |
| P2   | C20  | C21  | C22  | 176(2)     |
| P2   | C20  | C25  | C24  | -179(2)    |
| P2   | C19  | C14  | C15  | -68.2(19)  |
| P2   | C19  | C14  | C13  | 111.4(16)  |

| Atom | Atom | Atom | Atom | Angle/°    |
|------|------|------|------|------------|
| P2   | C27  | C32  | C31  | 173.7(12)  |
| P2   | C27  | C28  | C29  | -173.8(12) |
| C20  | P2   | C19  | C14  | -162.1(17) |
| C20  | P2   | C27  | C32  | -82.7(12)  |
| C20  | P2   | C27  | C28  | 91.0(12)   |
| C20  | C21  | C22  | C23  | 3(5)       |
| C26  | P2   | C20  | C21  | 27(3)      |
| C26  | P2   | C20  | C25  | -154(2)    |
| C26  | P2   | C19  | C14  | -43(2)     |
| C26  | P2   | C27  | C32  | 157.2(11)  |
| C26  | P2   | C27  | C28  | -29.0(13)  |
| C19  | P2   | C20  | C21  | 146(2)     |
| C19  | P2   | C20  | C25  | -35(3)     |
| C19  | P2   | C27  | C32  | 36.8(13)   |
| C19  | P2   | C27  | C28  | -149.5(11) |
| C19  | C14  | C15  | C16  | 179.6(15)  |
| C19  | C14  | C13  | P1   | 6.8(15)    |
| C19  | C14  | C13  | C18  | -179.6(16) |
| C21  | C20  | C25  | C24  | 1(4)       |
| C21  | C22  | C23  | C24  | 0(5)       |
| C14  | C15  | C16  | C17  | 0.0        |
| C15  | C14  | C13  | P1   | -173.7(12) |
| C15  | C14  | C13  | C18  | 0.0        |
| C15  | C16  | C17  | C18  | 0.0        |
| C16  | C17  | C18  | C13  | 0.0        |
| C17  | C18  | C13  | P1   | 173.8(11)  |
| C17  | C18  | C13  | C14  | 0.0        |
| C13  | P1   | C1   | C6   | -106.2(11) |
| C13  | P1   | C1   | C2   | 80.1(11)   |
| C13  | P1   | C7   | C12  | -151.4(10) |

| Atom | Atom | Atom | Atom | Angle/°    |
|------|------|------|------|------------|
| C13  | P1   | C7   | C8   | 25.6(12)   |
| C13  | C14  | C15  | C16  | 0.0        |
| C22  | C23  | C24  | C25  | -3(5)      |
| C23  | C24  | C25  | C20  | 2(4)       |
| C27  | P2   | C20  | C21  | -93(2)     |
| C27  | P2   | C20  | C25  | 86(2)      |
| C27  | P2   | C19  | C14  | 79.0(19)   |
| C27  | C32  | C31  | C30  | 0.0        |
| C32  | C27  | C28  | C29  | 0.0        |
| C32  | C31  | C30  | C29  | 0.0        |
| C31  | C30  | C29  | C28  | 0.0        |
| C30  | C29  | C28  | C27  | 0.0        |
| C28  | C27  | C32  | C31  | 0.0        |
| C1   | P1   | C13  | C14  | -179.7(9)  |
| C1   | P1   | C13  | C18  | 6.5(11)    |
| C1   | P1   | C7   | C12  | 96.0(11)   |
| C1   | P1   | C7   | C8   | -86.9(12)  |
| C1   | C6   | C5   | C4   | 0.0        |
| C6   | C1   | C2   | C3   | 0.0        |
| C6   | C5   | C4   | C3   | 0.0        |
| C5   | C4   | C3   | C2   | 0.0        |
| C4   | C3   | C2   | C1   | 0.0        |
| C2   | C1   | C6   | C5   | 0.0        |
| C7   | P1   | C13  | C14  | 65.6(10)   |
| C7   | P1   | C13  | C18  | -108.1(10) |
| C7   | P1   | C1   | C6   | 4.8(12)    |
| C7   | P1   | C1   | C2   | -168.9(9)  |
| C7   | C12  | C11  | C10  | 0.0        |
| C12  | C7   | C8   | C9   | 0.0        |
| C12  | C11  | C10  | C9   | 0.0        |

| Atom | Atom | Atom | Atom | Angle/° |
|------|------|------|------|---------|
| C11  | C10  | C9   | C8   | 0.0     |
| C10  | C9   | C8   | C7   | 0.0     |
| C8   | C7   | C12  | C11  | 0.0     |
| C25  | C20  | C21  | C22  | -3(4)   |

**Table 7:** Atomic Occupancies for all atoms that are not fully occupied in **17br88a**.

| Atom | Occupancy |
|------|-----------|
| Br1  | 0.534     |
| Br2  | 0.294     |
| Cl1  | 0.466     |
| Cl2  | 0.706     |

#### Citations

O.V. Dolomanov and L.J. Bourhis and R.J. Gildea and J.A.K. Howard and H. Puschmann, Olex2: A complete structure solution, refinement and analysis program, *J. Appl. Cryst.*, (2009), **42**, 339-341.

Sheldrick, G.M., Crystal structure refinement with ShelXL, *Acta Cryst.*, (2015), **C71**, 3-8.

Sheldrick, G.M., ShelXT-Integrated space-group and crystal-structure determination, *Acta Cryst.*, (2015), **A71**, 3-8.

Software for the Integration of CCD Detector System Bruker Analytical X-ray Systems, Bruker axs, Madison, WI (after 2013).

## 19. Stability studies of compounds Ia-f in DMSO and in presence of water

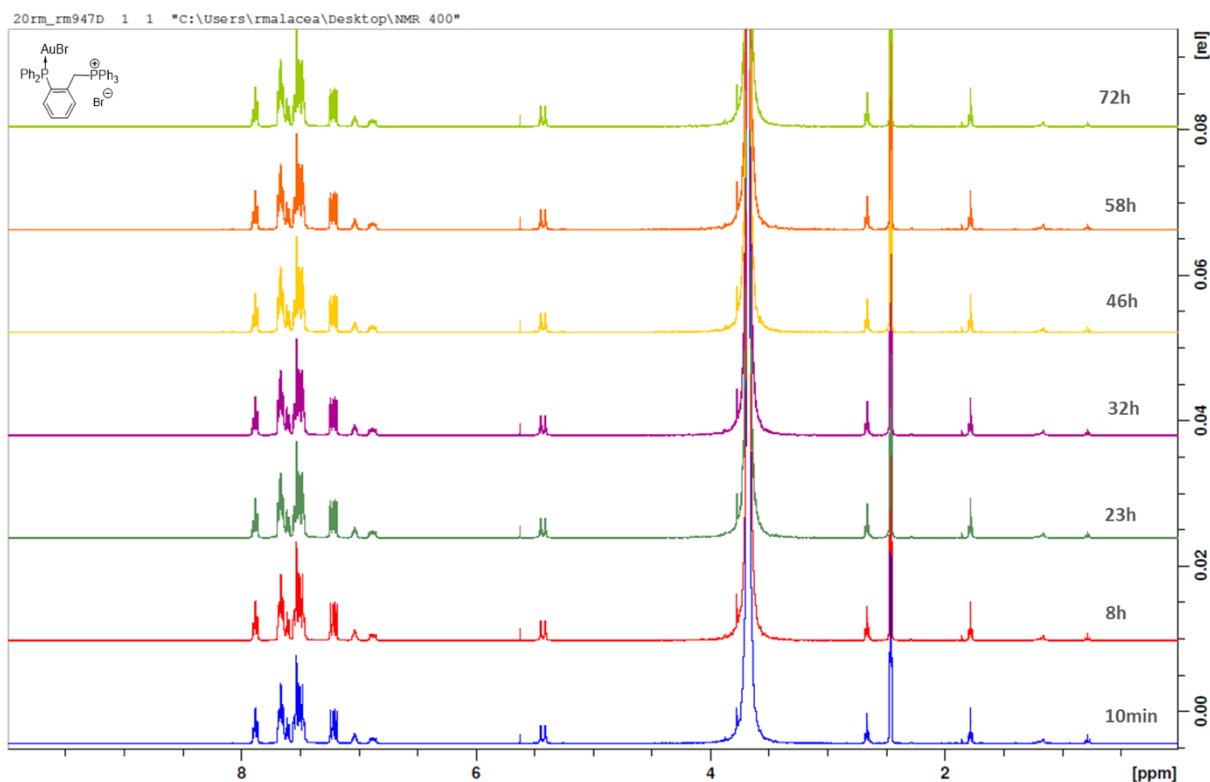

Stability of **Ia** in DMSO- $\text{D}_6$  followed by  $^1\text{H}$  NMR (400MHz)

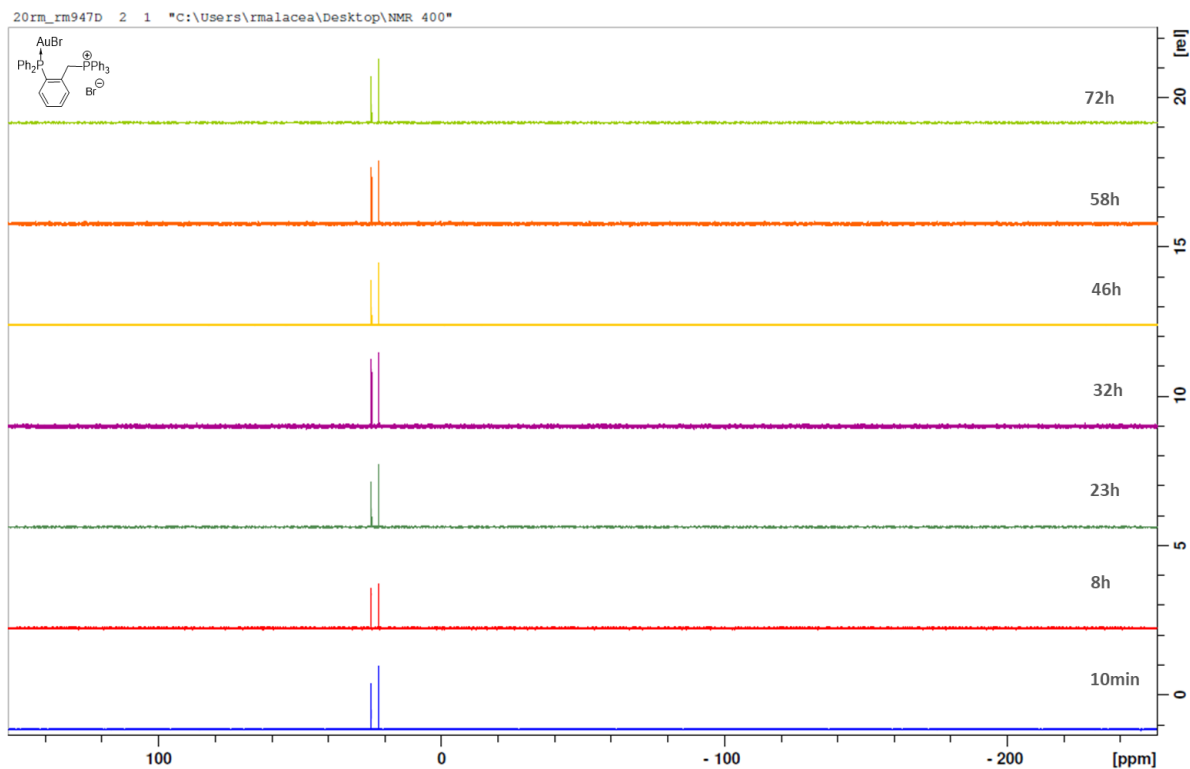

Stability of **Ia** in DMSO- $\text{D}_6$  followed by  $^{31}\text{P}$  NMR (162MHz)

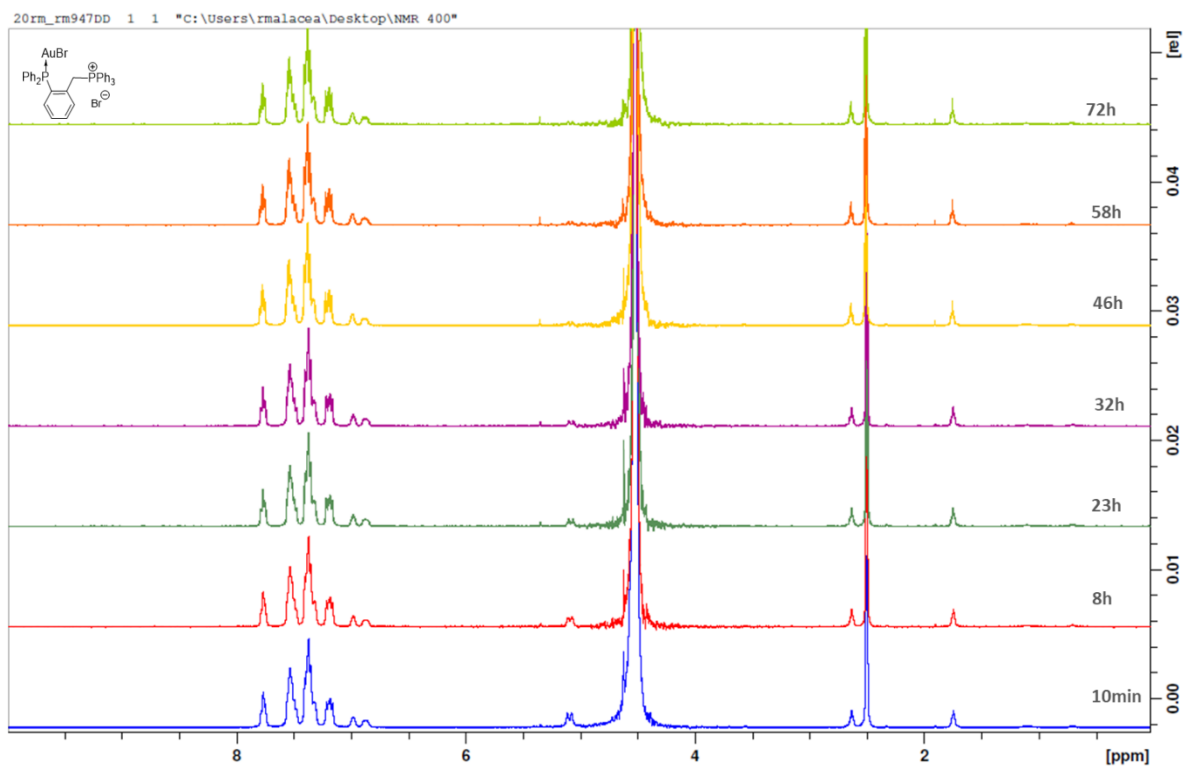

Stability of **1a** in DMSO- $\text{D}_6/\text{D}_2\text{O}$  followed by  $^1\text{H}$  NMR (400MHz)

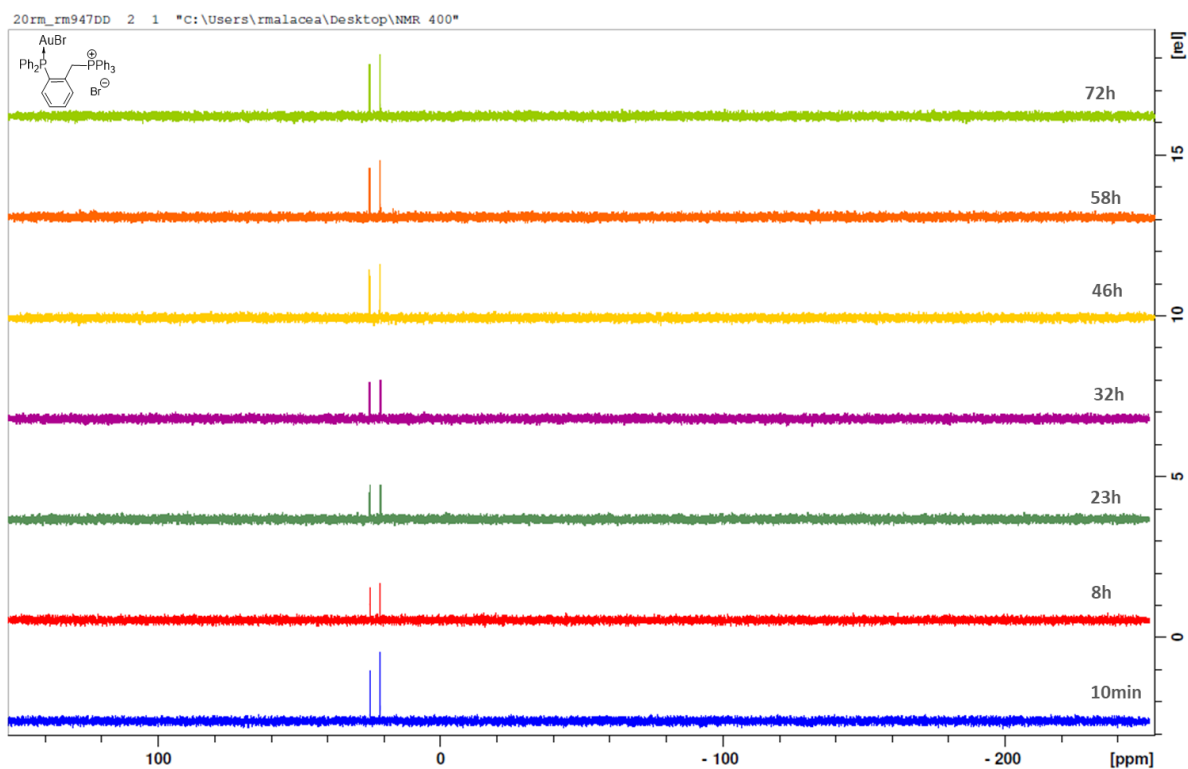

Stability of **1a** in DMSO- $\text{D}_6/\text{D}_2\text{O}$  followed by  $^{31}\text{P}$  NMR (162MHz)

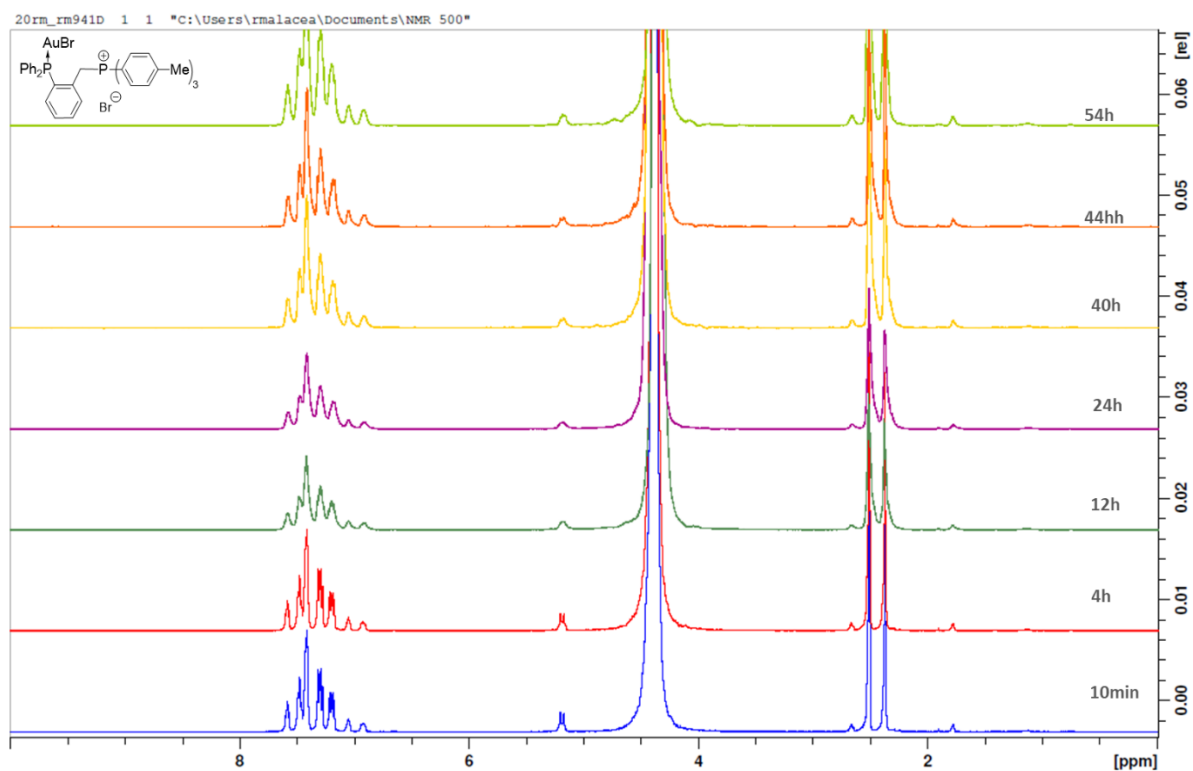Stability of **1b** in DMSO-D<sub>6</sub> followed by <sup>1</sup>H NMR (500MHz)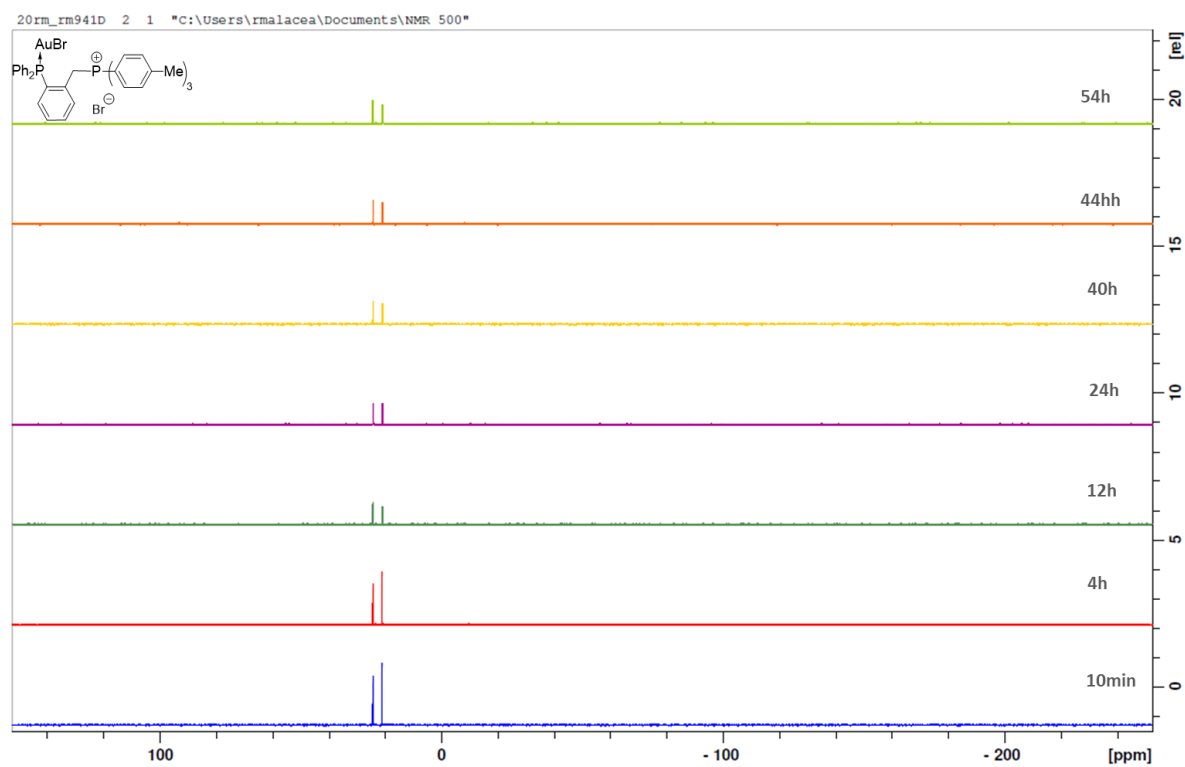

### Stability of **1b** in DMSO-D<sub>6</sub> followed by <sup>31</sup>P NMR (202MHz)

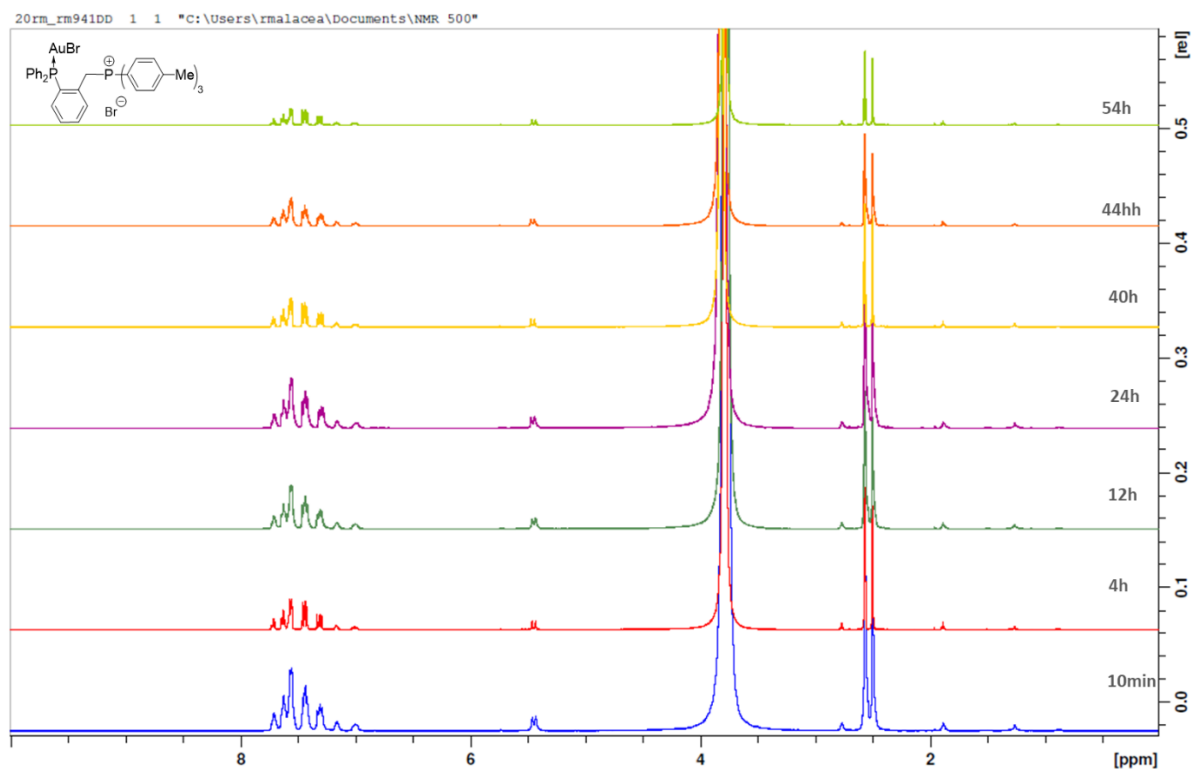

Stability of **1b** in DMSO- $\text{D}_6/\text{D}_2\text{O}$  followed by  $^1\text{H}$  NMR (500MHz)

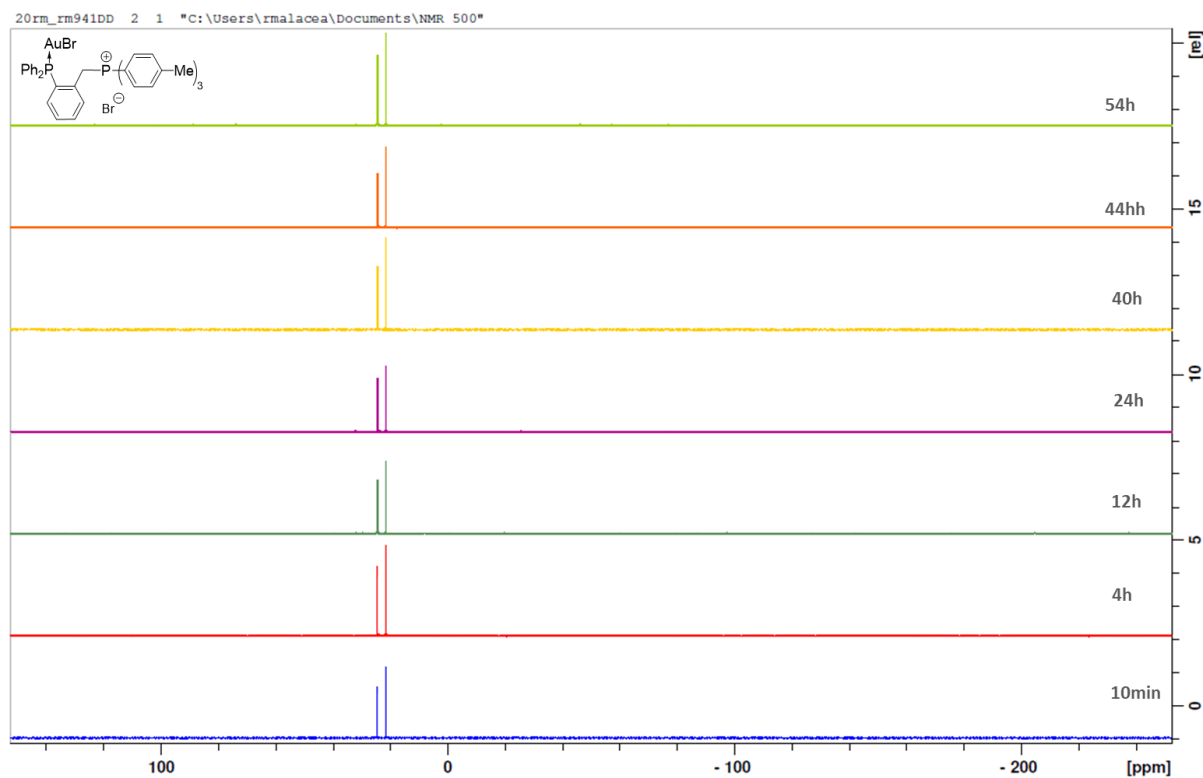

Stability of **1b** in DMSO- $\text{D}_6/\text{D}_2\text{O}$  followed by  $^{31}\text{P}$  NMR (202MHz)

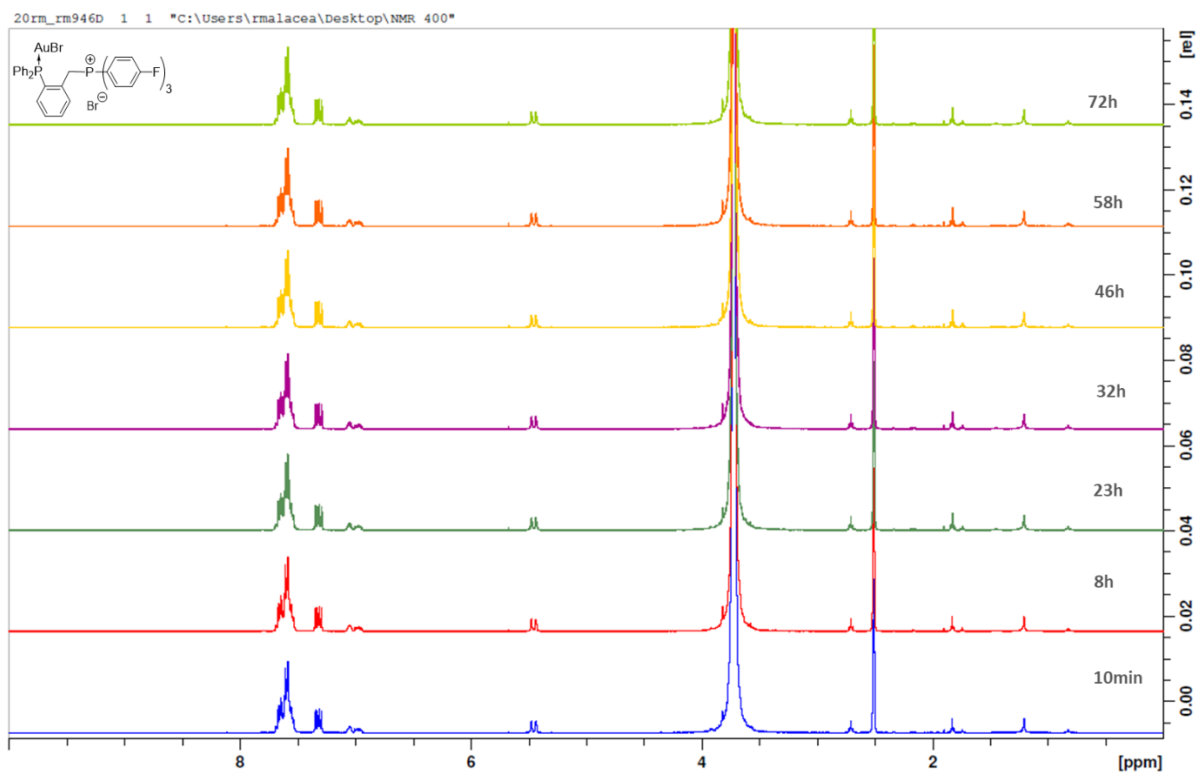

Stability of **1c** in  $\text{DMSO}-d_6$  followed by  $^1\text{H}$  NMR (400MHz)

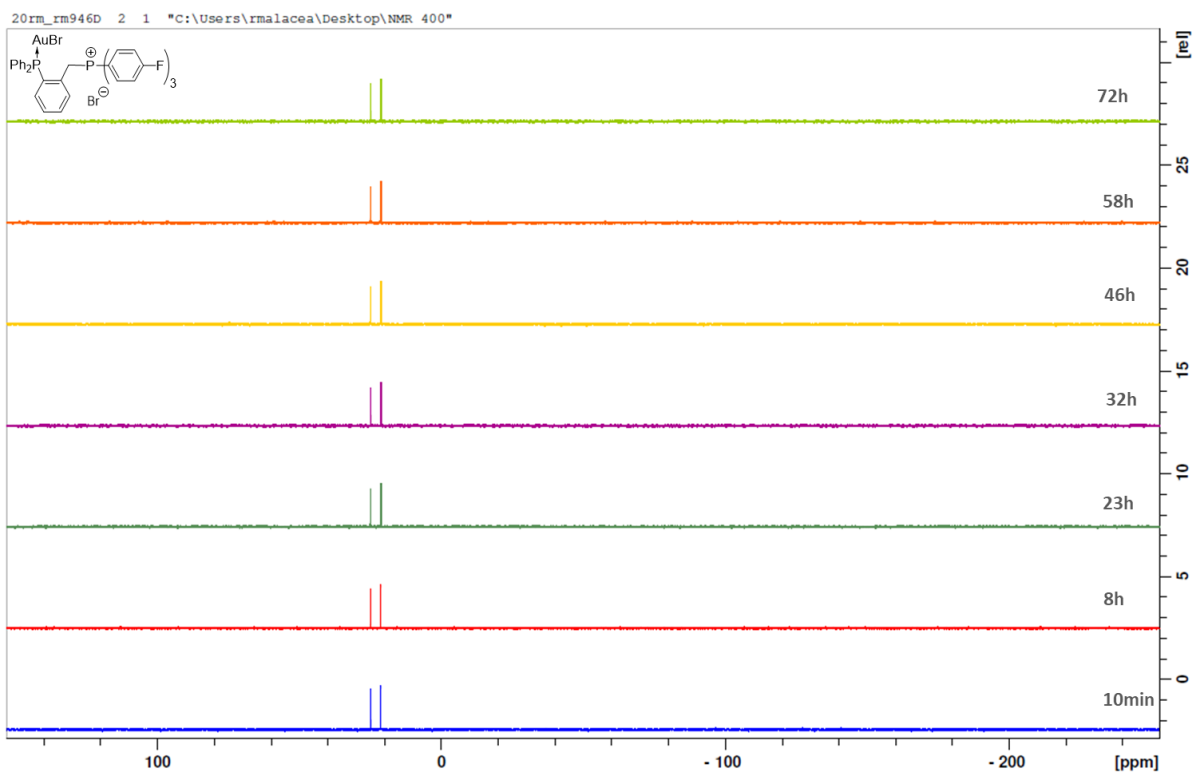

Stability of **1c** in  $\text{DMSO}-d_6$  followed by  $^{31}\text{P}$  NMR (162MHz)

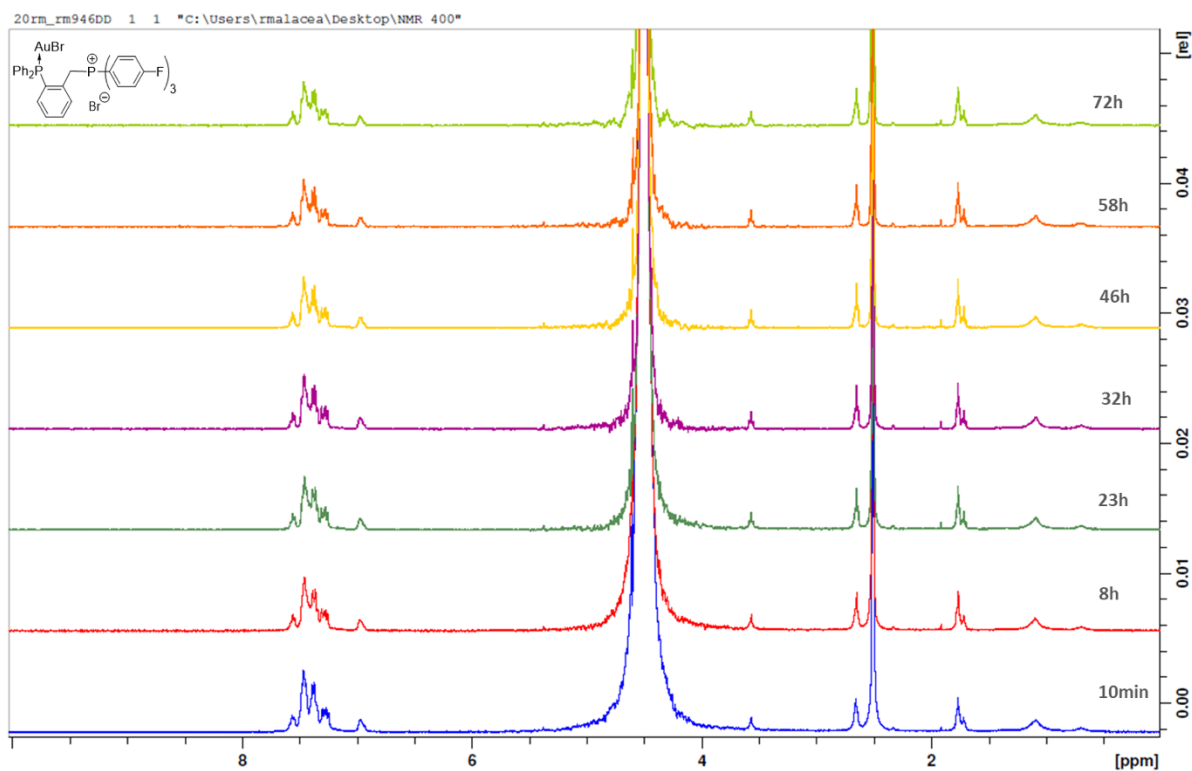

Stability of **1c** in DMSO-D<sub>6</sub>/D<sub>2</sub>O followed by <sup>1</sup>H NMR (400MHz)

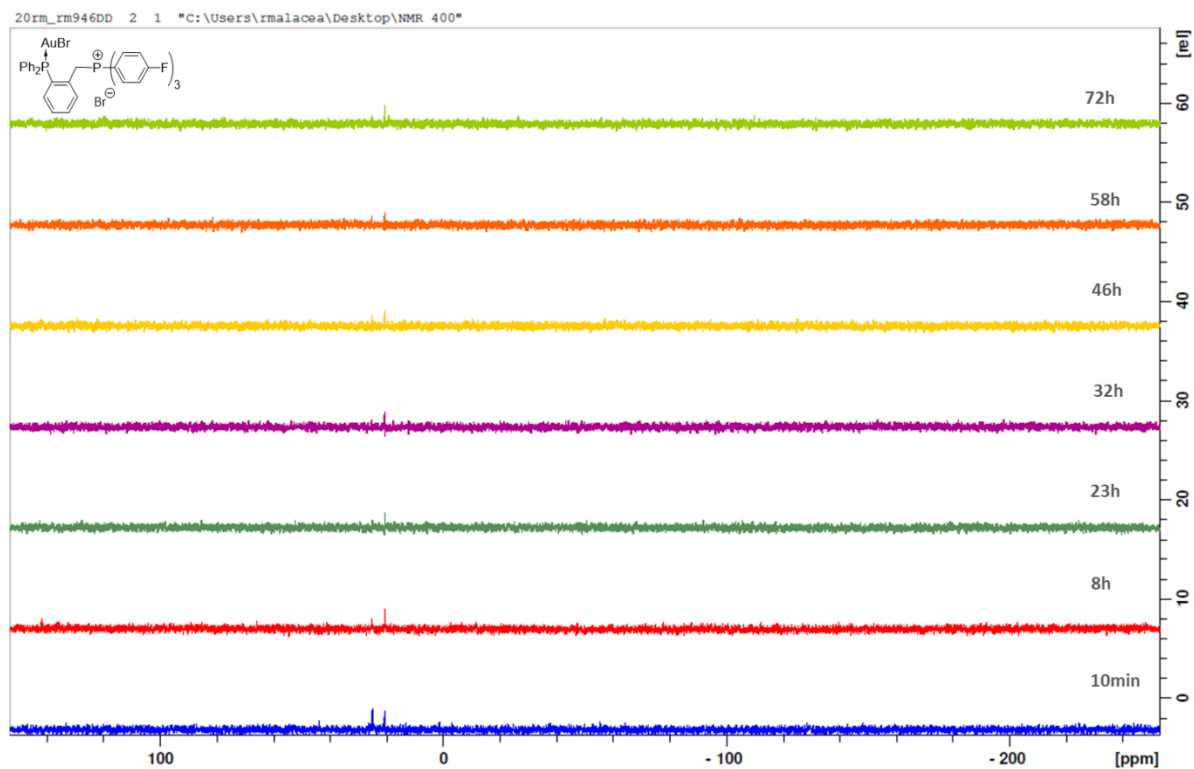

Stability of **1c** in DMSO-D<sub>6</sub>/D<sub>2</sub>O followed by <sup>31</sup>P NMR (162MHz)

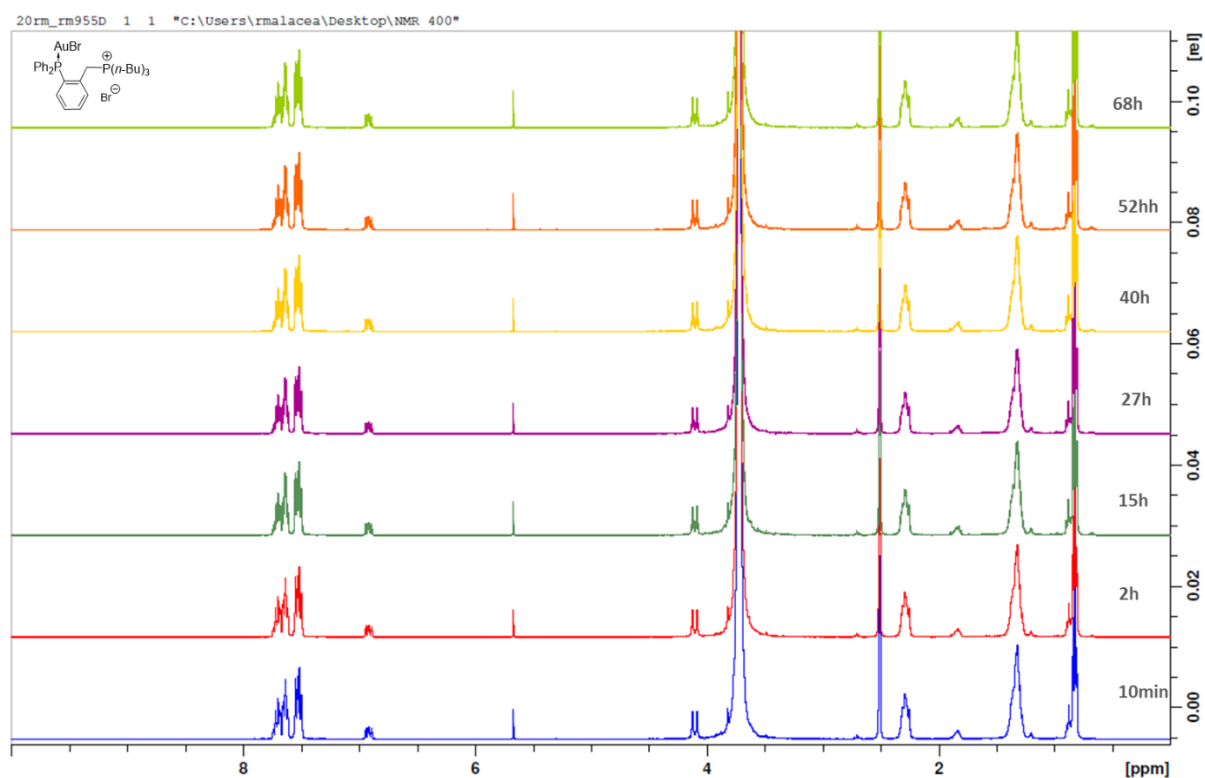

### Stability of **Id** in DMSO-D<sub>6</sub> followed by <sup>1</sup>H NMR (400MHz)

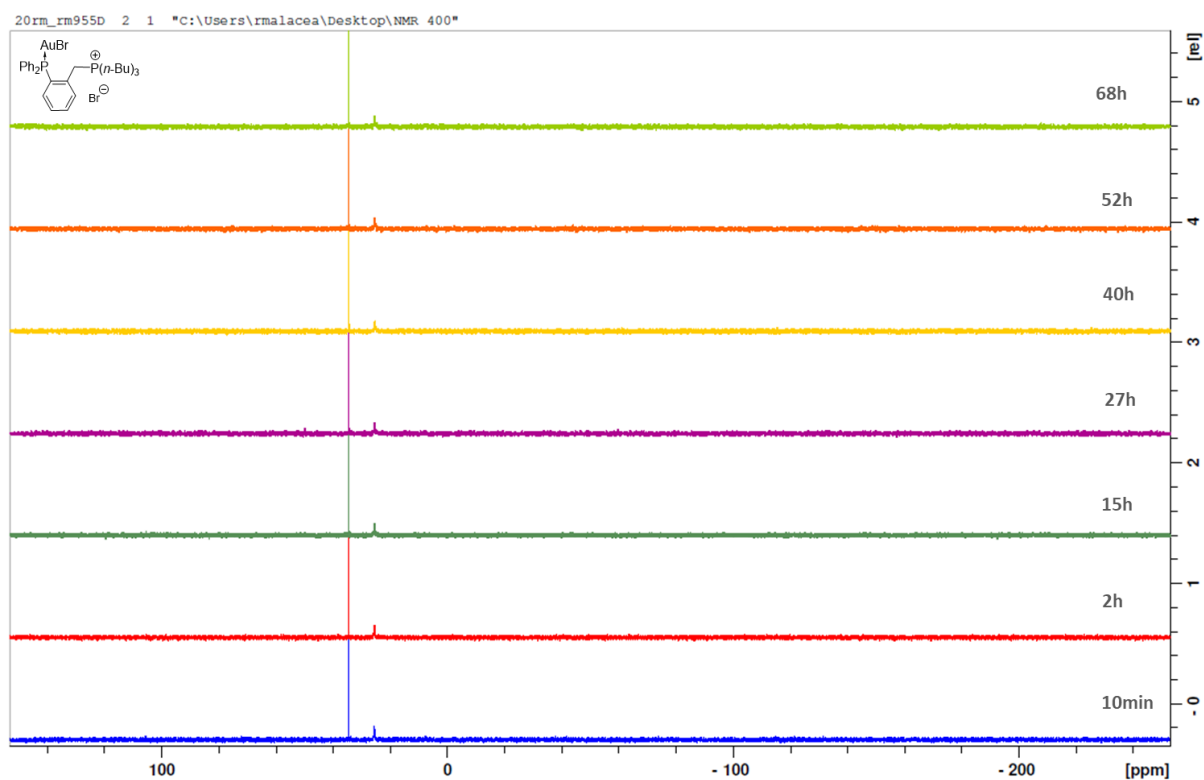

### Stability of **Id** in DMSO-D<sub>6</sub> followed by <sup>31</sup>P NMR (162MHz)

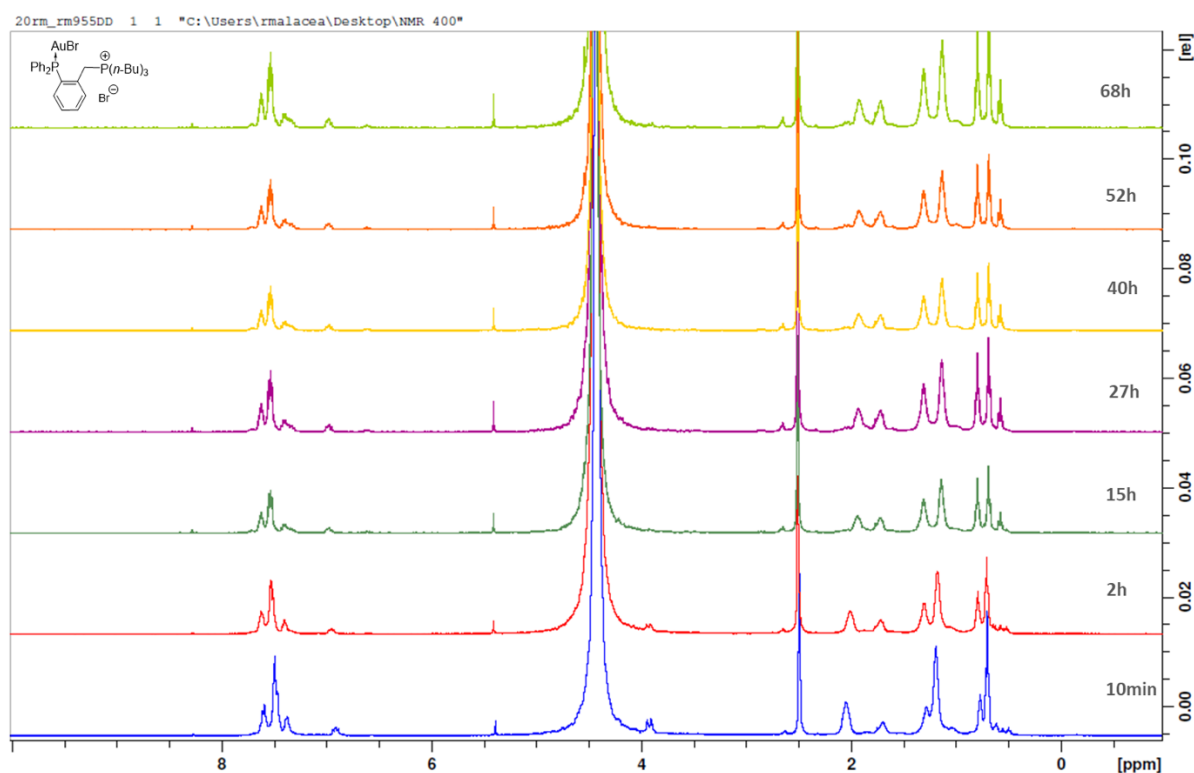

Stability of **Id** in DMSO- $\text{D}_6/\text{D}_2\text{O}$  followed by  $^1\text{H}$  NMR (400MHz)

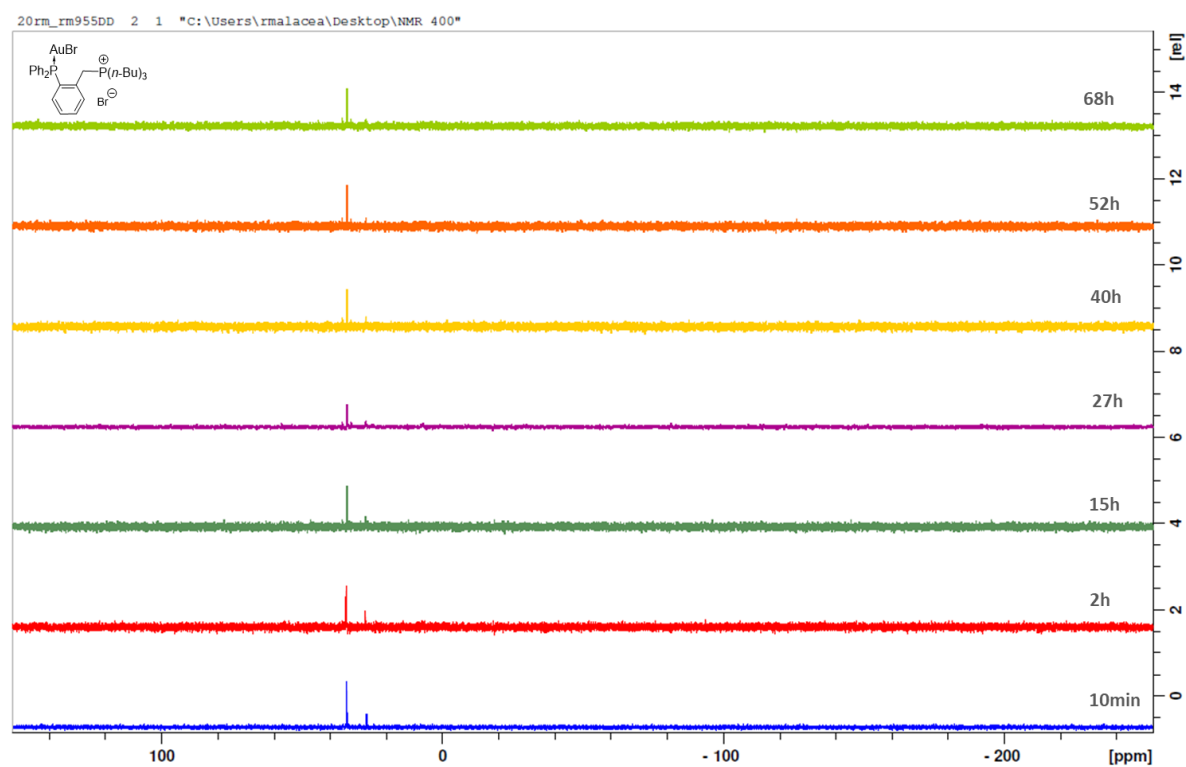

Stability of **Id** in DMSO- $\text{D}_6/\text{D}_2\text{O}$  followed by  $^{31}\text{P}$  NMR (162MHz)

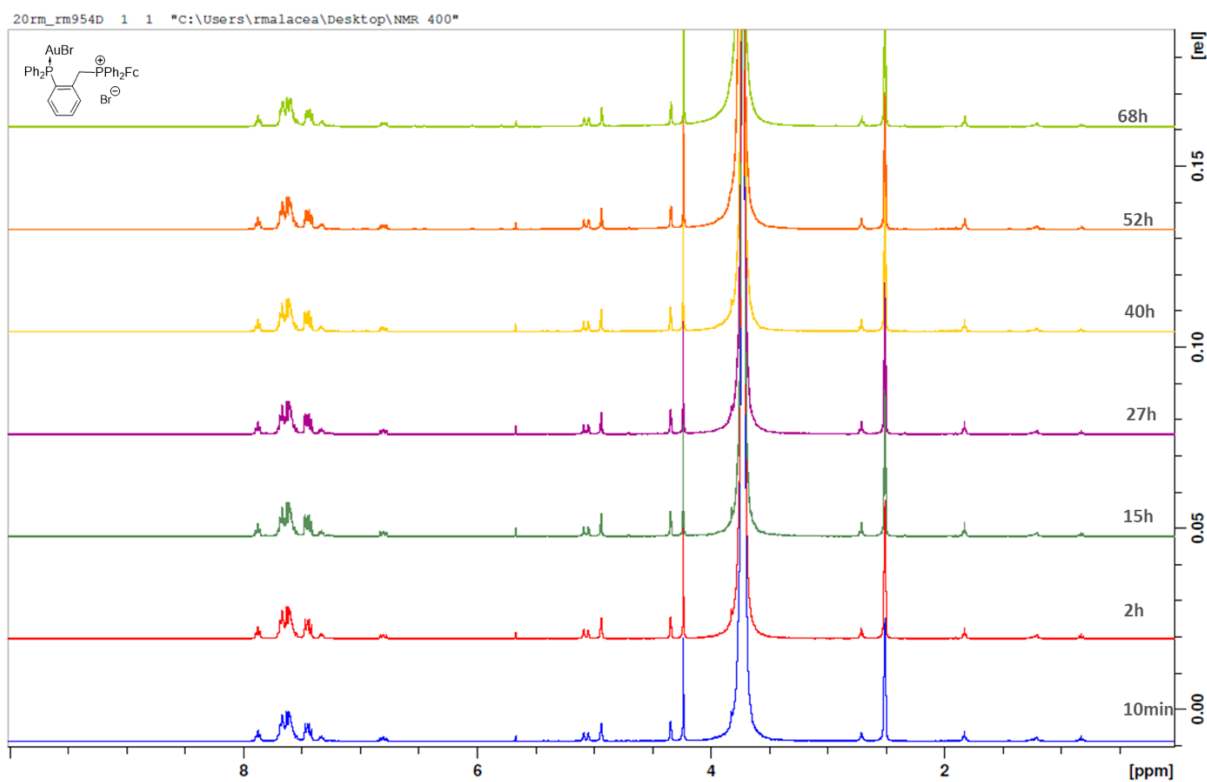

Stability of **1e** in DMSO-D<sub>6</sub> followed by <sup>1</sup>H NMR (400MHz)

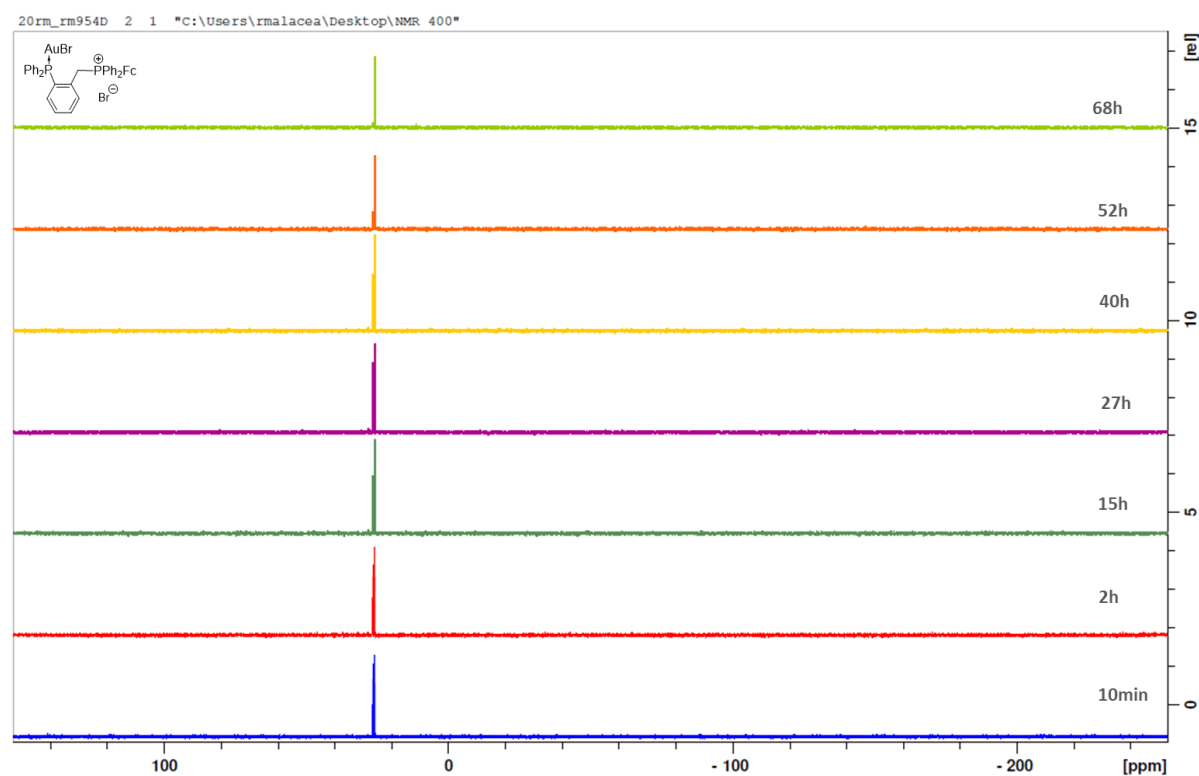

Stability of **1e** in DMSO-D<sub>6</sub> followed by <sup>31</sup>P NMR (162MHz)

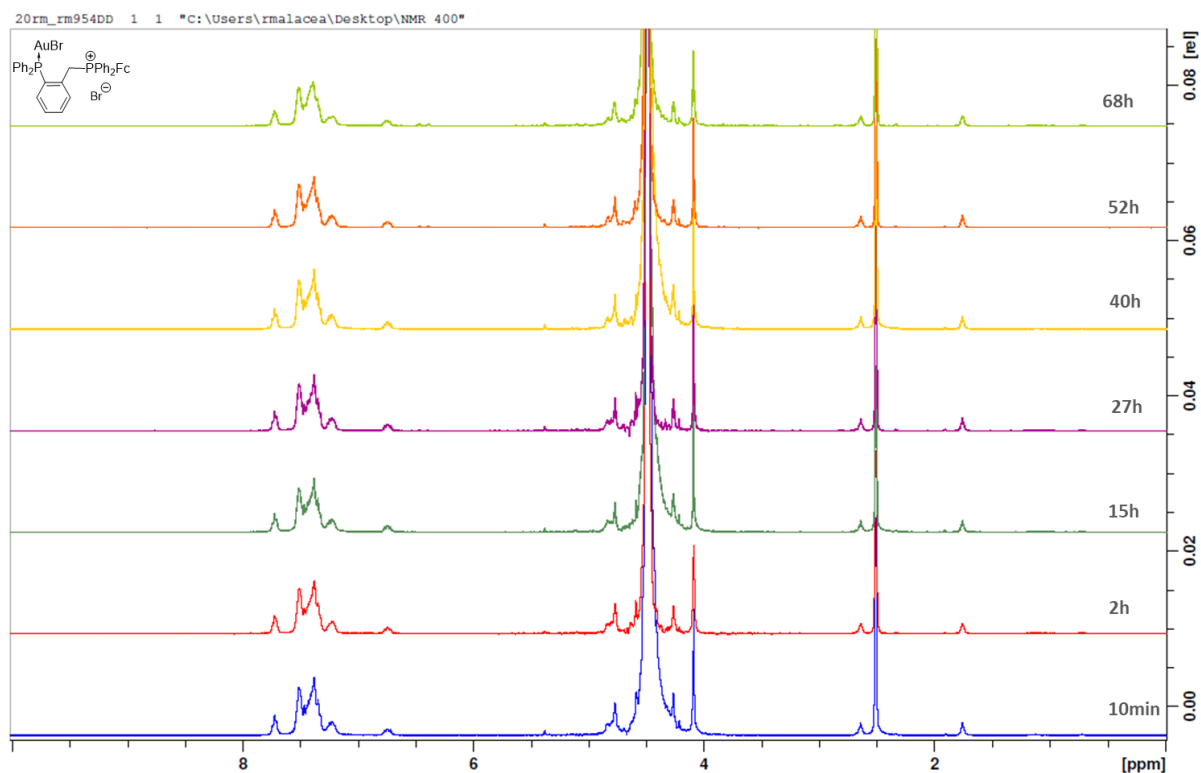

Stability of **1e** in DMSO-D<sub>6</sub>/D<sub>2</sub>O followed by <sup>1</sup>H NMR (400MHz)

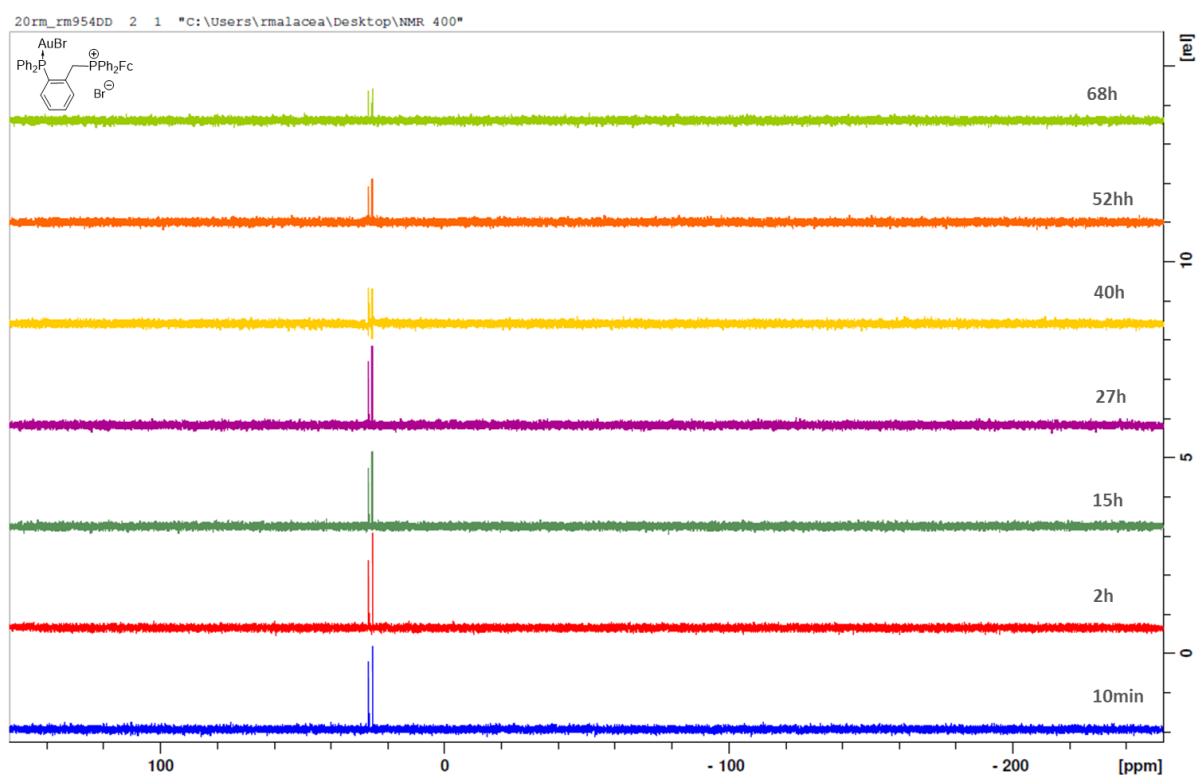

Stability of **1e** in DMSO-D<sub>6</sub>/D<sub>2</sub>O followed by <sup>31</sup>P NMR (162MHz)

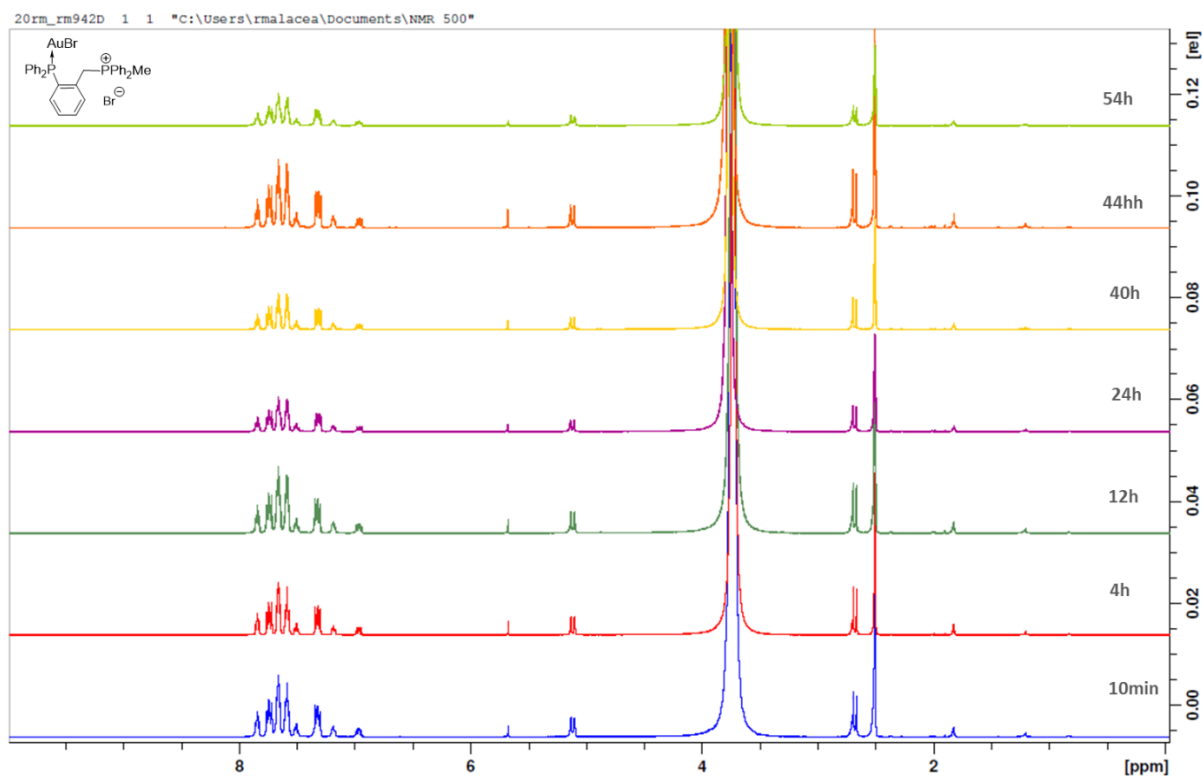

Stability of **If** in  $\text{DMSO}-d_6$  followed by  $^1\text{H}$  NMR (500MHz)

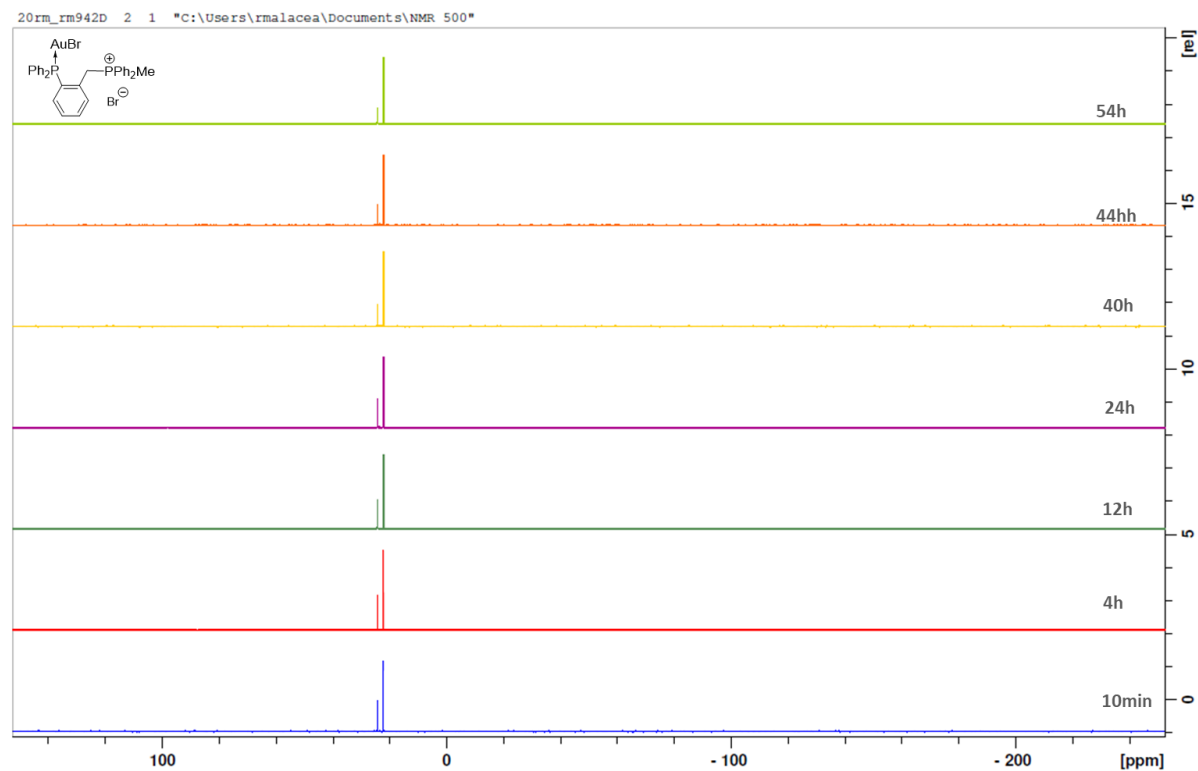

Stability of **If** in  $\text{DMSO}-d_6$  followed by  $^{31}\text{P}$  NMR (202MHz)

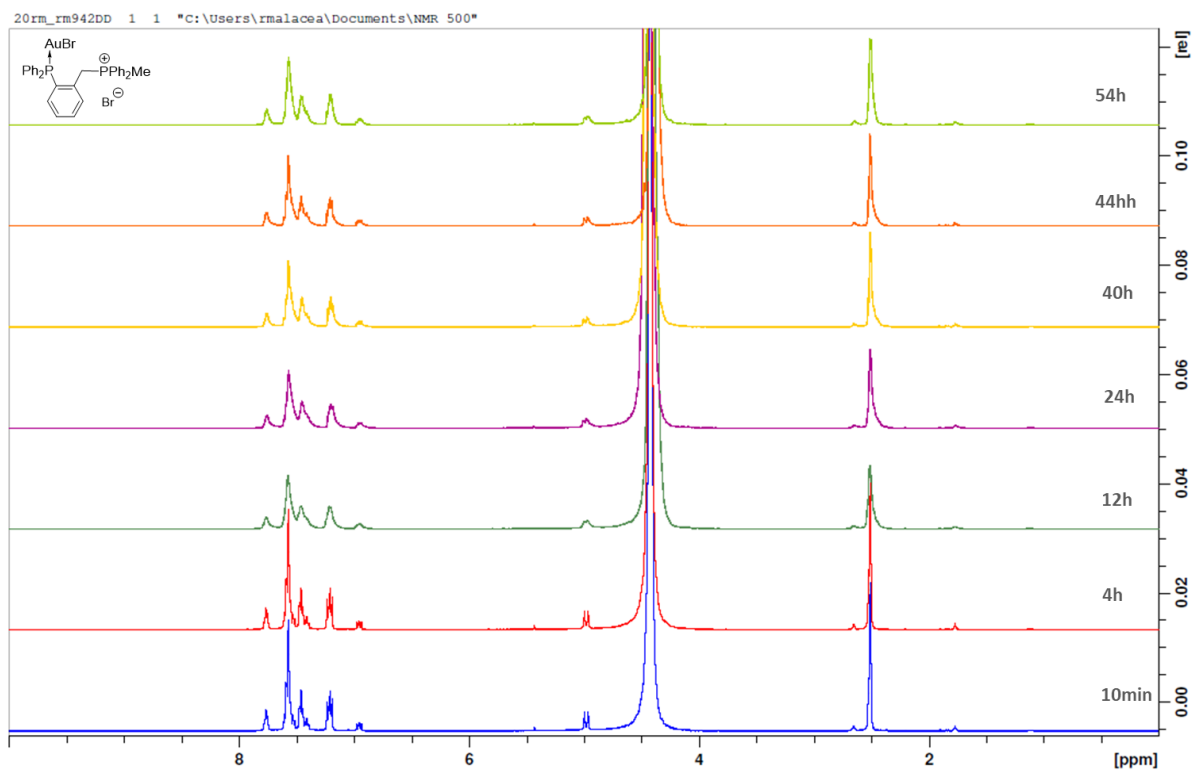

Stability of **If** in DMSO- $\text{D}_6/\text{D}_2\text{O}$  followed by  $^1\text{H}$  NMR (500MHz)

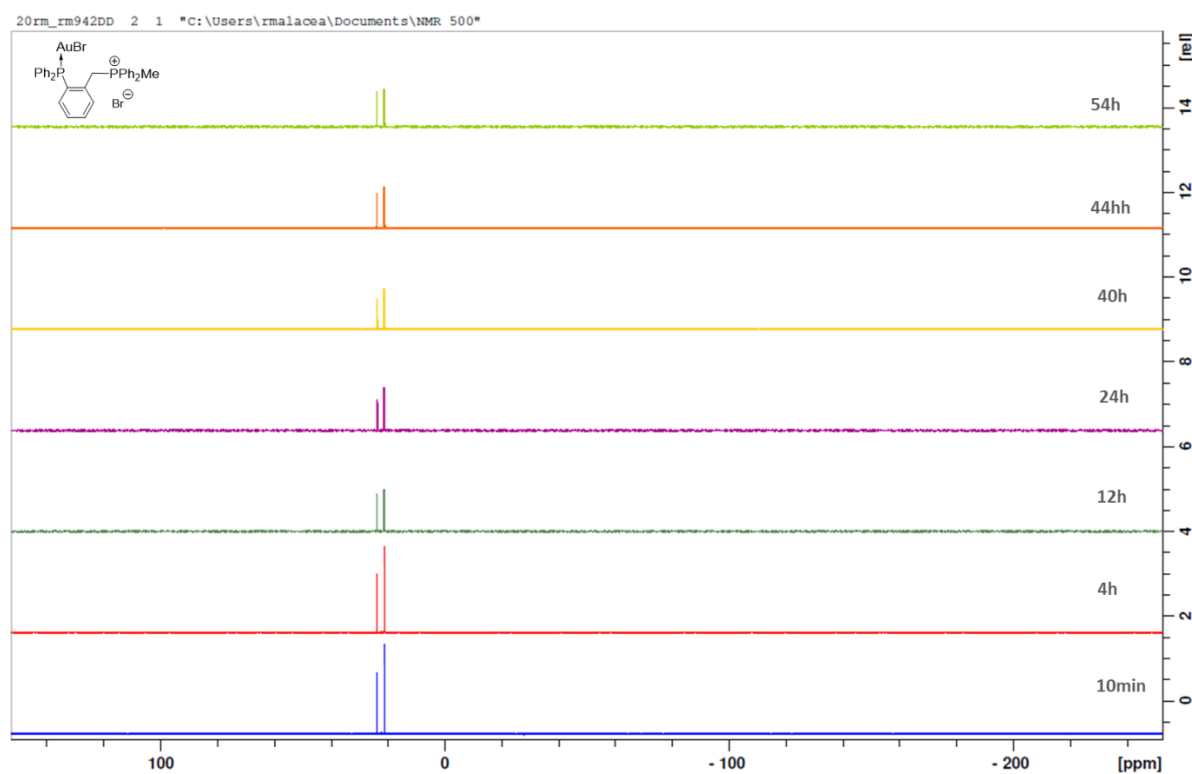

Stability of **If** in DMSO- $\text{D}_6/\text{D}_2\text{O}$  followed by  $^{31}\text{P}$  NMR (202MHz)

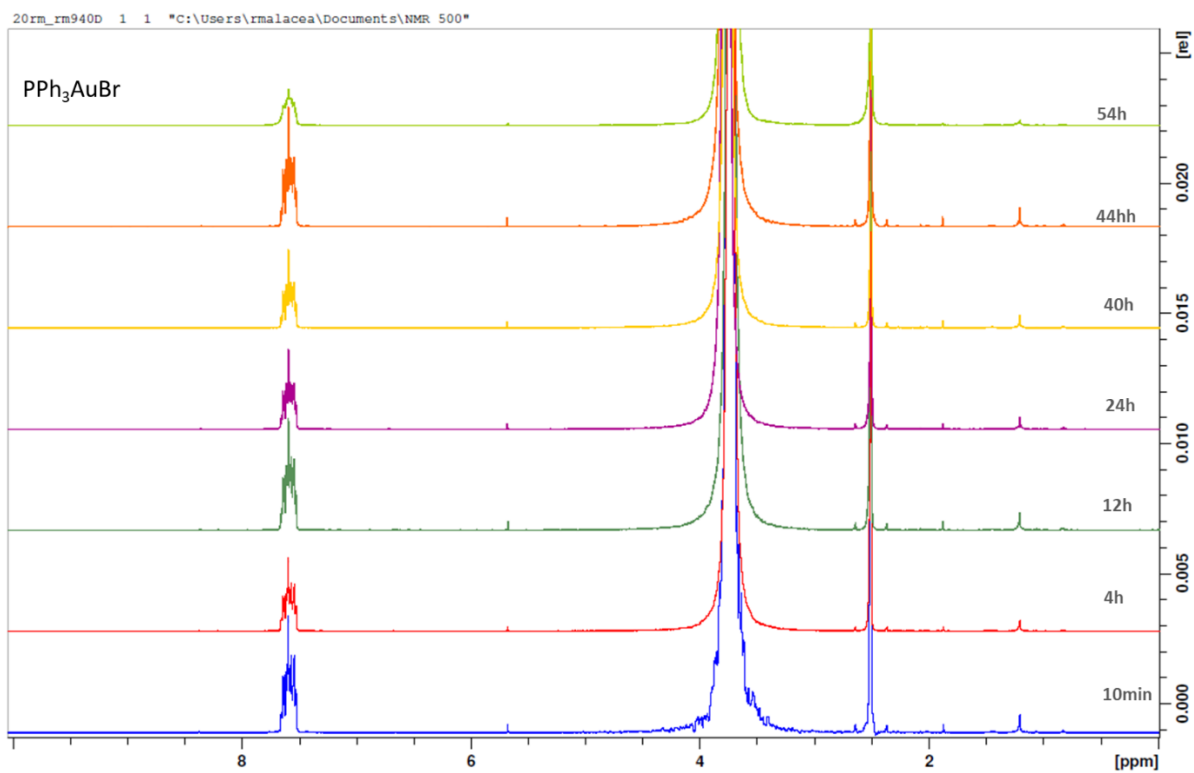

Stability of **Ig** in DMSO-D<sub>6</sub> followed by <sup>1</sup>H NMR (500MHz)

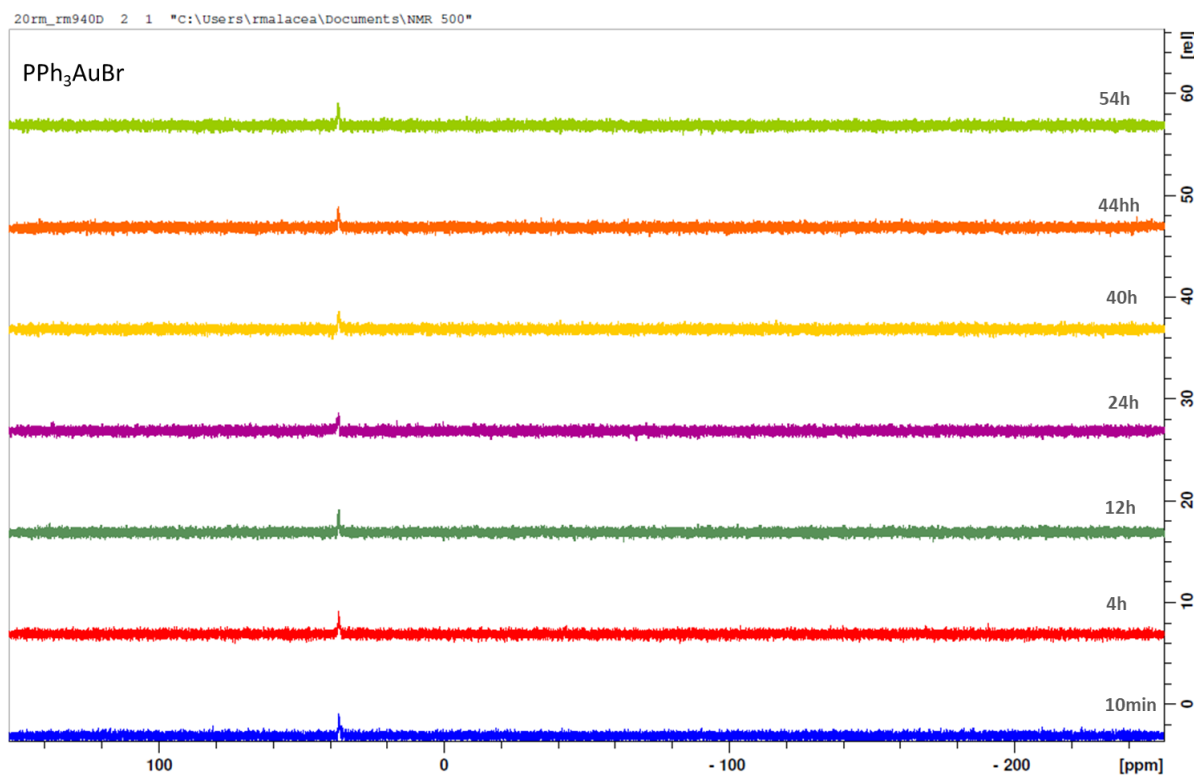

Stability of **Ig** in DMSO-D<sub>6</sub> followed by <sup>31</sup>P NMR (202MHz)

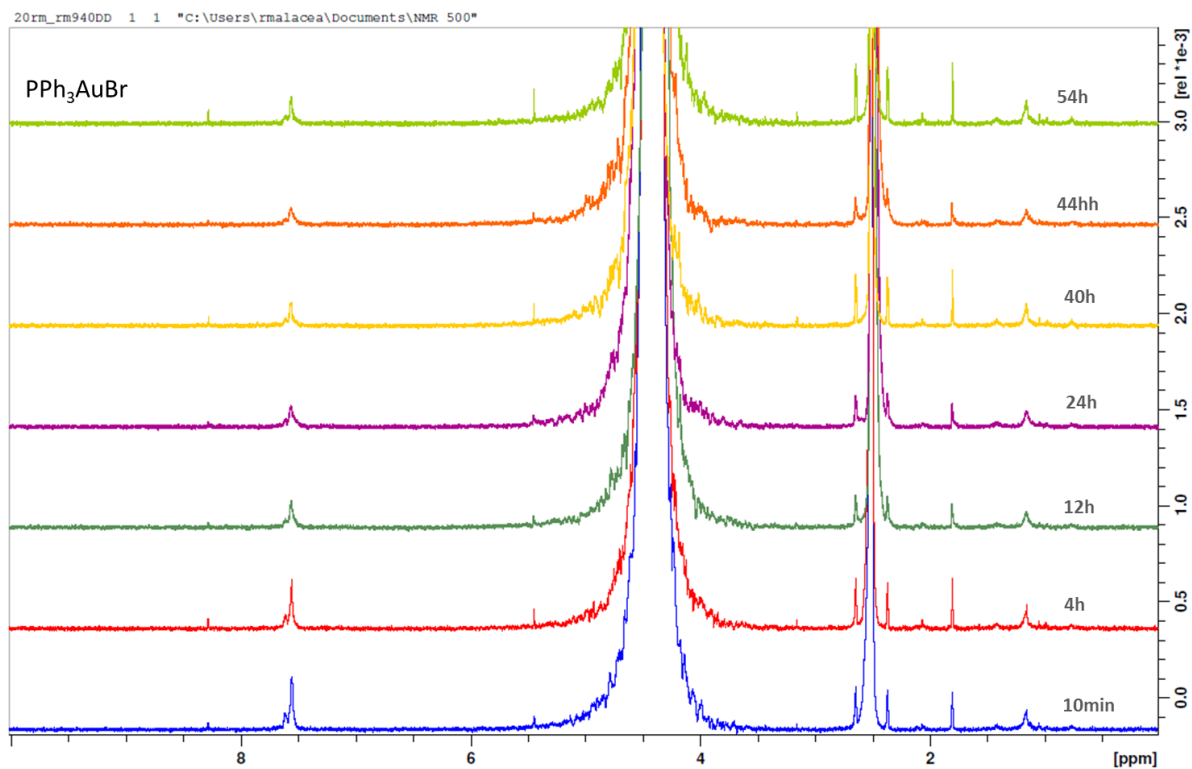

Stability of **Ig** in DMSO-D<sub>6</sub>/D<sub>2</sub>O followed by <sup>1</sup>H NMR (500MHz)

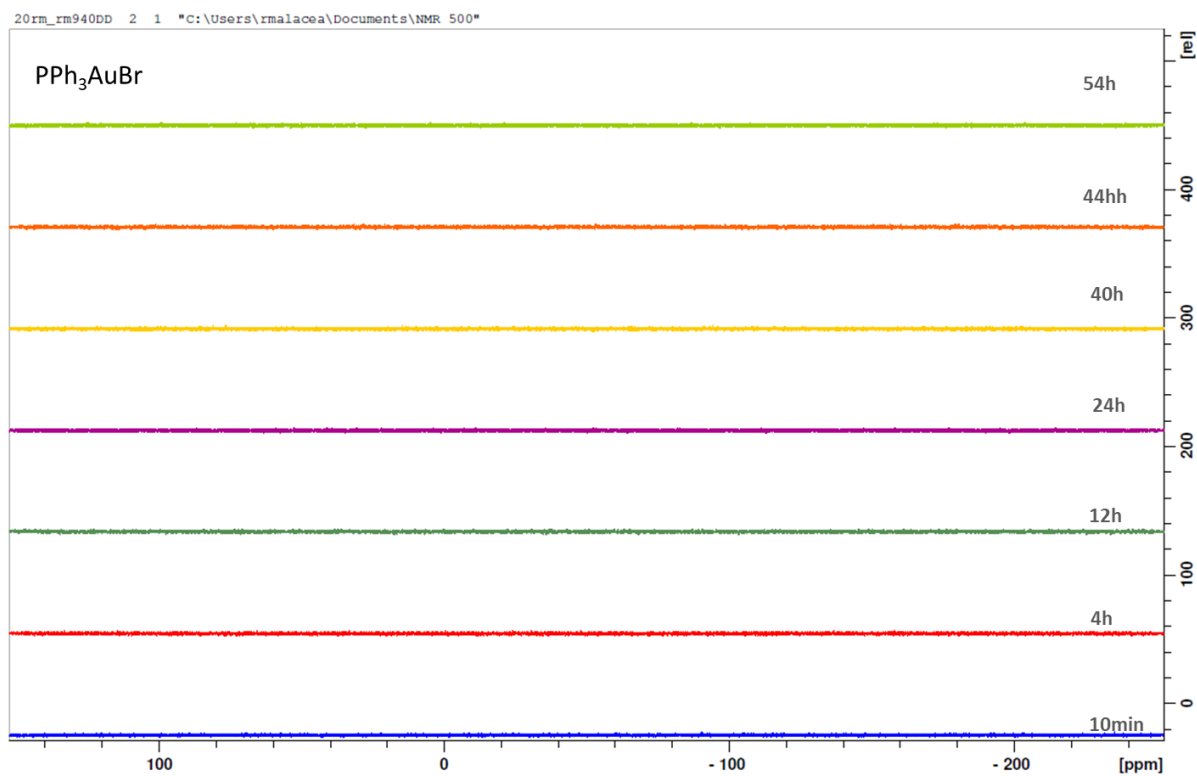

Stability of **Ig** in DMSO-D<sub>6</sub>/D<sub>2</sub>O followed by <sup>31</sup>P NMR (202MHz)

20. Water solubility of gold complexes **la-lg** determined by ICP-AES

Procedure : Approximately 1 mg of each product is dissolved in 5 mL of ultra pure water. After one hour of stirring, the suspension was filtered through a 0.45 mm filter and mineralized by mMW with concentrated Trace Metal quality HCl. The gold concentration in solution was further measured by ICP-AES Thermo Electron (ICAP-7000).

| Gold complexes | Mass sample dissolved in 5ml water | Elemental analysis | Total Au in the initial sample | Measured Au in solution | Dissolved compound |
|----------------|------------------------------------|--------------------|--------------------------------|-------------------------|--------------------|
|                | mg                                 | % Au               | mg                             | mg                      | %                  |
| <b>la</b>      | 1.11                               | 22.02              | 0.24                           | 0.121                   | 49.38              |
| <b>lb</b>      | 1.08                               | 21.03              | 0.23                           | 0.153                   | 67.46              |
| <b>lc</b>      | 1.06                               | 20.77              | 0.22                           | 0.101                   | 46.04              |
| <b>ld</b>      | 1.5                                | 23.61              | 0.35                           | 0.172                   | 48.47              |
| <b>le</b>      | 1.05                               | 19.65              | 0.21                           | 0.130                   | 62.80              |
| <b>lf</b>      | 1.14                               | 23.67              | 0.27                           | 0.207                   | 76.63              |
| <b>lg</b>      | 1.18                               | 36.53              | 0.43                           | 0.002                   | 0.43               |

21. Cells cytotoxicity curves of Ia-g. DMSO. oxaliplatin. 5-FU. paclitaxel (A549)

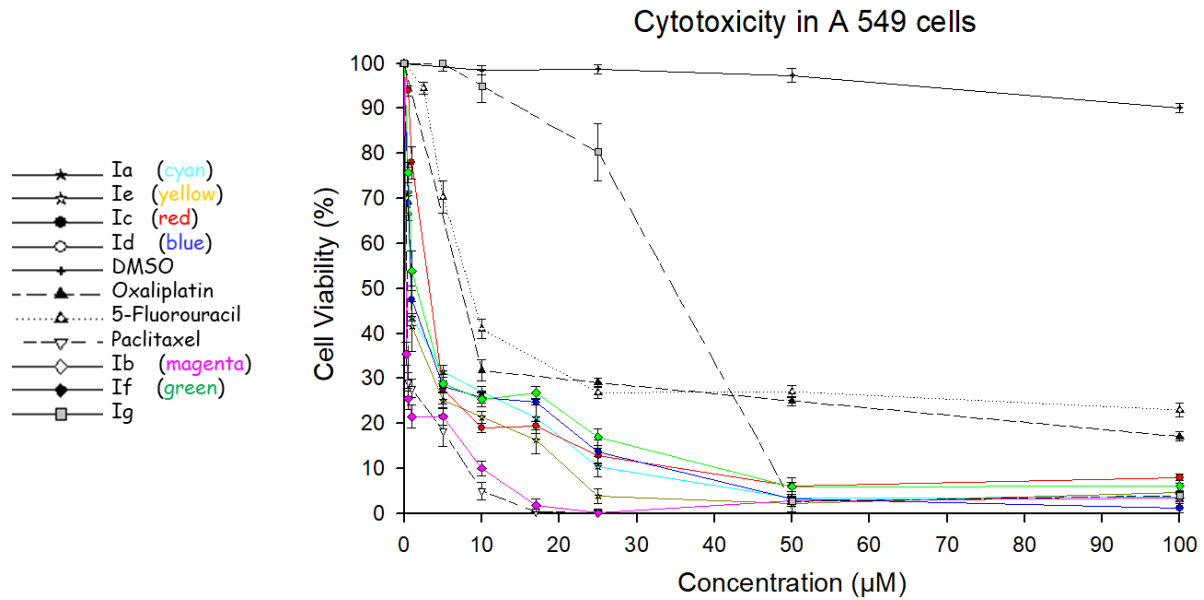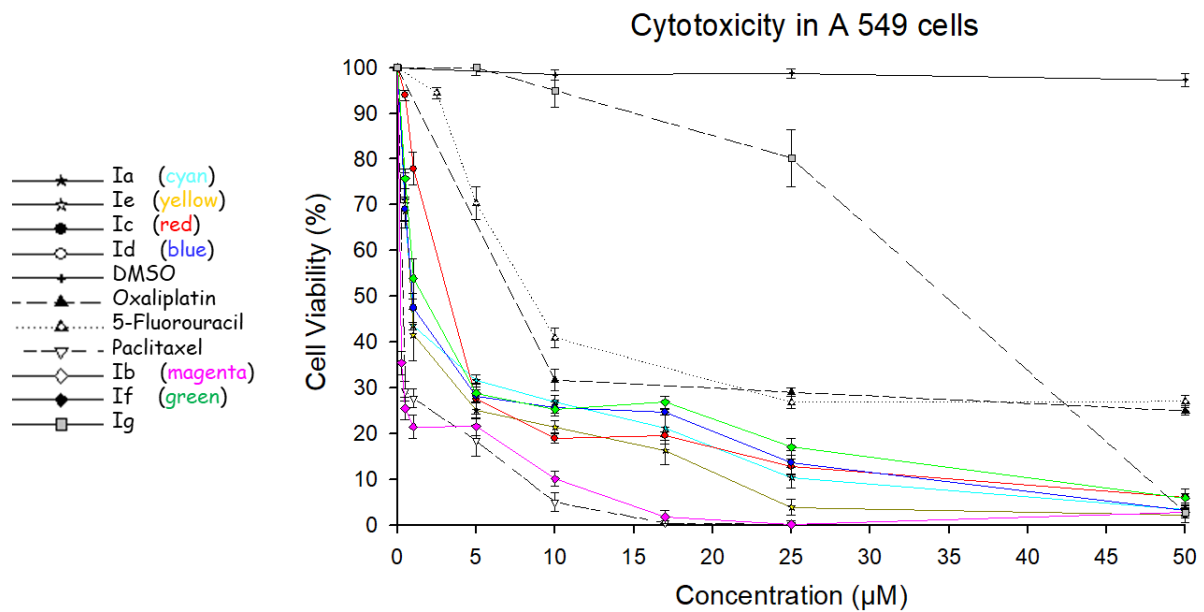

## 22. Cells cytotoxicity curves of Ia-g. DMSO. oxaliplatin. 5-FU. paclitaxel (MDA-MB-231)

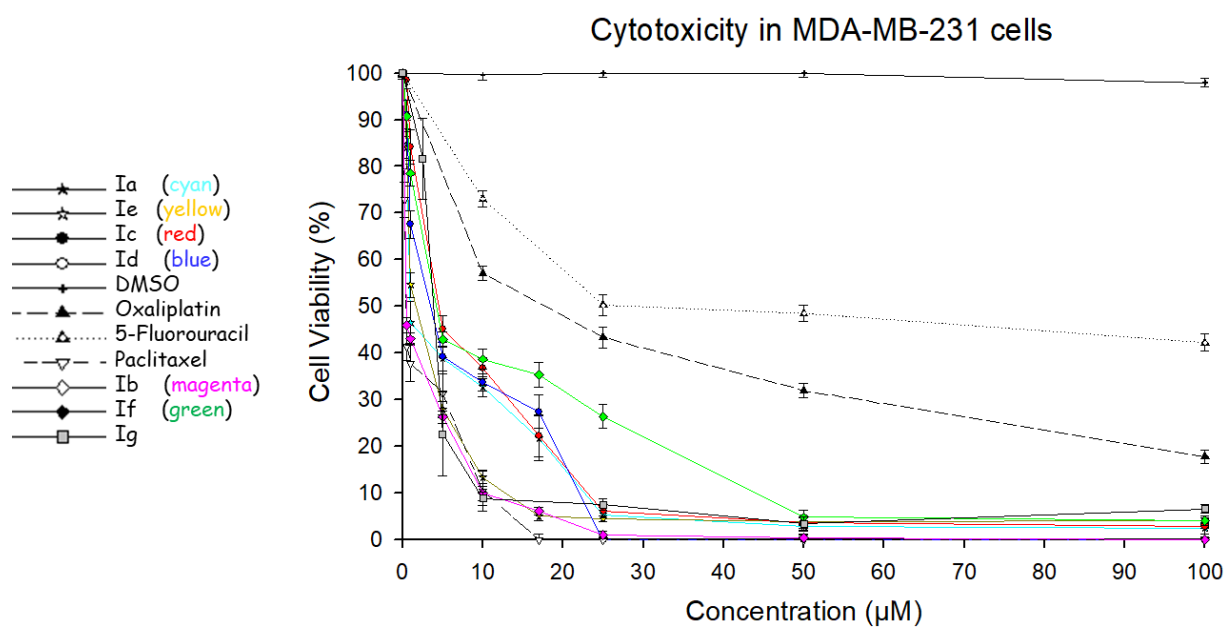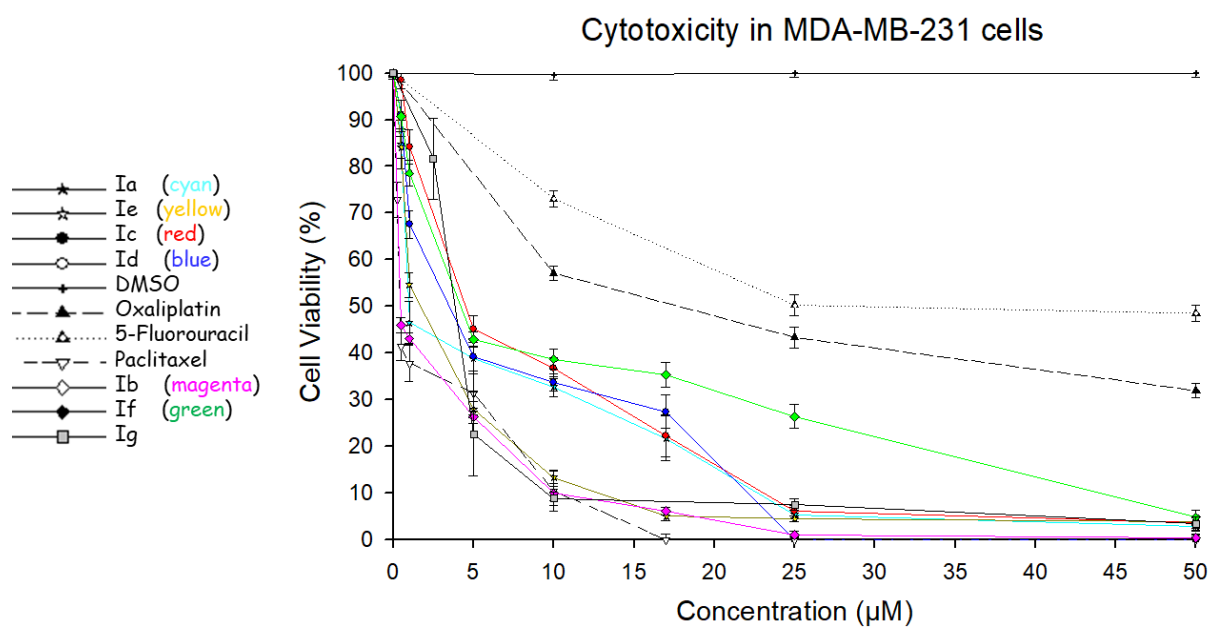

23. Cells cytotoxicity curves of Ia-g. DMSO. oxaliplatin. 5-FU. paclitaxel (SW480)

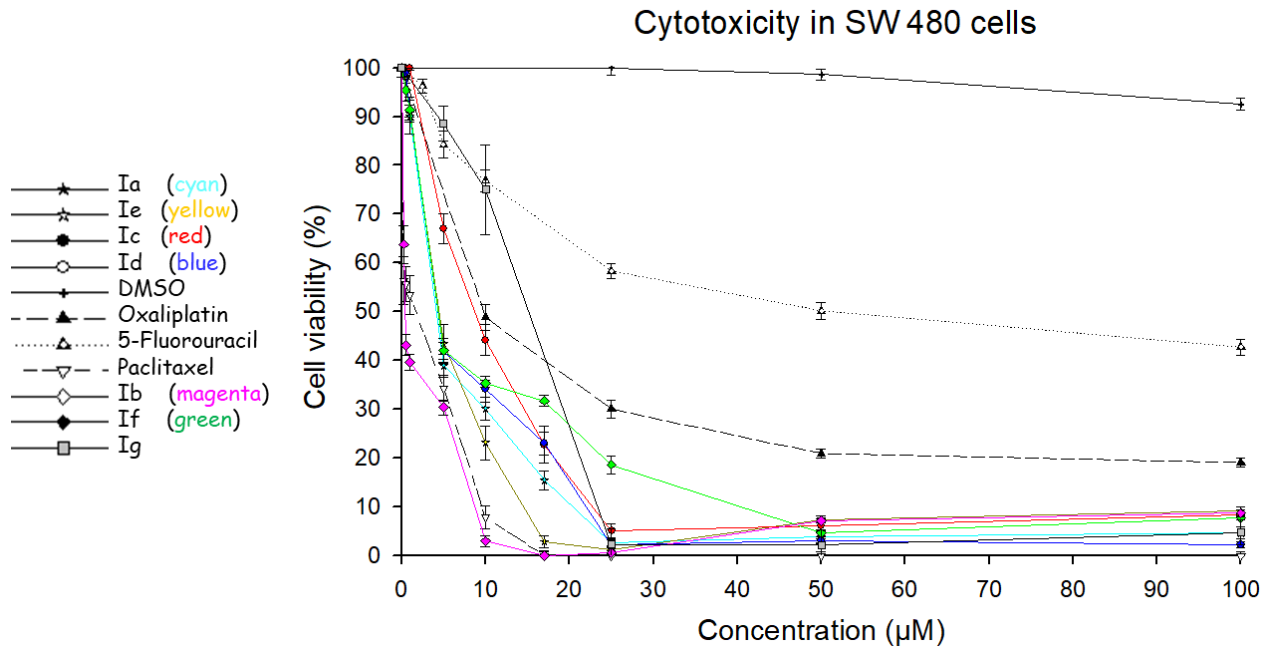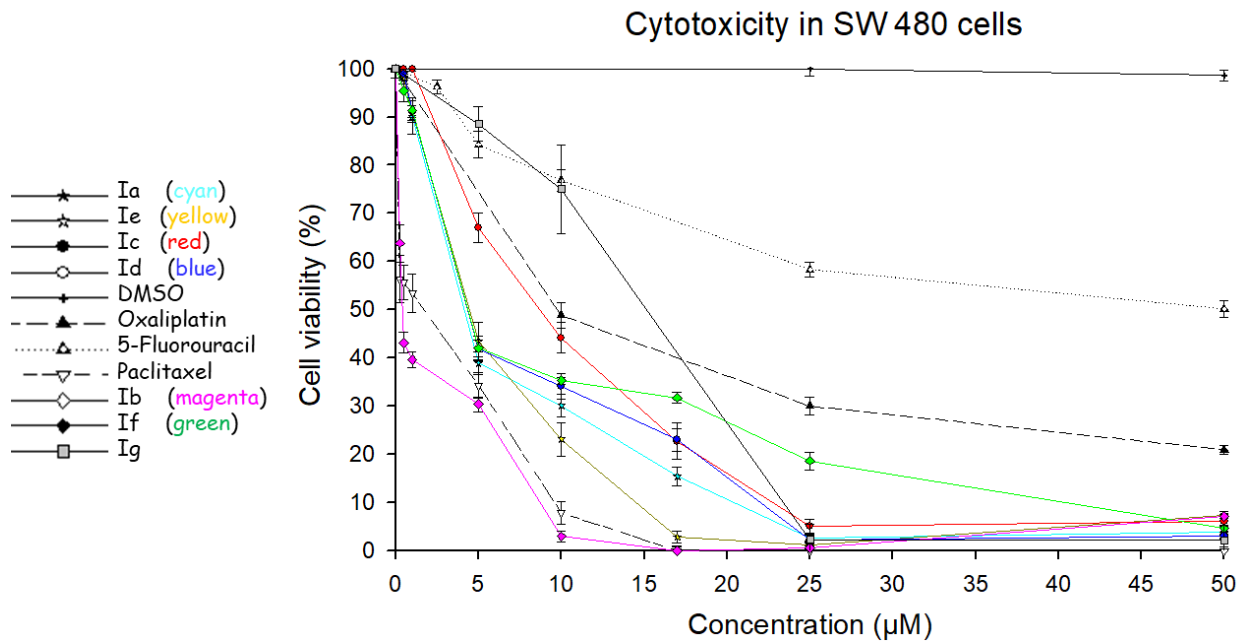

Supplement: d0dt03708g1.pdf [file d0dt03708g1.pdf]
